# Supplementary material for: Adverse event profile differences between maribavir and valganciclovir: findings from the FDA adverse event reporting system
Source: Front Pharmacol. 2025 May 26;16:1518258. doi: 10.3389/fphar.2025.1518258 (PMC12146299; doi:10.3389/fphar.2025.1518258)
Supplement: Supplementary file 1 [file Table2.xlsx]

## Sheet: Sheet 1
Supplementary Tables S2.Signal strength of Valganciclovir AEs at the preferred term level in the FAERS database.
PT	number	soc_name_en	ROR(95%Cl)	PRR(χ2)	95%Cl of PRR	EBGM(EBGM05)	IC(IC025)
OFF LABEL USE	898	INJURY, POISONING AND PROCEDURAL COMPLICATIONS	7.8 ( 7.29 - 8.36 )	7.19 ( 4842.86 )	7.13-7.26	7.19 ( 6.78 )	2.85 ( 1.18 )
CYTOMEGALOVIRUS INFECTION	481	INFECTIONS AND INFESTATIONS	196.83 ( 179.33 - 216.05 )	187.44 ( 86119.19 )	187.36-187.53	180.95 ( 167.39 )	7.5 ( 5.83 )
DEATH	260	GENERAL DISORDERS AND ADMINISTRATION SITE CONDITIONS	1.92 ( 1.69 - 2.17 )	1.89 ( 110.69 )	1.77-2.01	1.89 ( 1.71 )	0.92 ( -0.75 )
NO ADVERSE EVENT	252	GENERAL DISORDERS AND ADMINISTRATION SITE CONDITIONS	10.28 ( 9.07 - 11.65 )	10.05 ( 2054.21 )	9.93-10.17	10.03 ( 9.03 )	3.33 ( 1.66 )
INTENTIONAL PRODUCT USE ISSUE	249	INJURY, POISONING AND PROCEDURAL COMPLICATIONS	18.35 ( 16.17 - 20.81 )	17.92 ( 3968.88 )	17.79-18.04	17.86 ( 16.07 )	4.16 ( 2.49 )
NEUTROPENIA	246	BLOOD AND LYMPHATIC SYSTEM DISORDERS	11.72 ( 10.33 - 13.3 )	11.46 ( 2347.83 )	11.33-11.58	11.43 ( 10.28 )	3.52 ( 1.85 )
DRUG INEFFECTIVE	201	GENERAL DISORDERS AND ADMINISTRATION SITE CONDITIONS	0.94 ( 0.82 - 1.08 )	0.94 ( 0.77 )	0.8-1.08	0.94 ( 0.84 )	-0.09 ( -1.75 )
LEUKOPENIA	175	BLOOD AND LYMPHATIC SYSTEM DISORDERS	22.06 ( 18.99 - 25.62 )	21.69 ( 3441.88 )	21.54-21.84	21.6 ( 19.06 )	4.43 ( 2.77 )
DRUG RESISTANCE	171	GENERAL DISORDERS AND ADMINISTRATION SITE CONDITIONS	44.01 ( 37.82 - 51.23 )	43.28 ( 7007.47 )	43.13-43.43	42.93 ( 37.81 )	5.42 ( 3.76 )
DIARRHOEA	117	GASTROINTESTINAL DISORDERS	1.14 ( 0.95 - 1.37 )	1.14 ( 2.1 )	0.96-1.32	1.14 ( 0.98 )	0.19 ( -1.47 )
CYTOMEGALOVIRUS VIRAEMIA	116	INFECTIONS AND INFESTATIONS	197.4 ( 163.83 - 237.85 )	195.13 ( 21594.04 )	194.94-195.31	188.1 ( 160.94 )	7.56 ( 5.89 )
THROMBOCYTOPENIA	113	BLOOD AND LYMPHATIC SYSTEM DISORDERS	6.35 ( 5.28 - 7.65 )	6.29 ( 503.3 )	6.11-6.48	6.29 ( 5.38 )	2.65 ( 0.99 )
PATHOGEN RESISTANCE	105	INFECTIONS AND INFESTATIONS	72.28 ( 59.56 - 87.72 )	71.54 ( 7204.92 )	71.35-71.73	70.58 ( 60.03 )	6.14 ( 4.47 )
PANCYTOPENIA	100	BLOOD AND LYMPHATIC SYSTEM DISORDERS	11.4 ( 9.36 - 13.88 )	11.29 ( 936.99 )	11.1-11.49	11.27 ( 9.56 )	3.49 ( 1.83 )
PRODUCT USE IN UNAPPROVED INDICATION	87	INJURY, POISONING AND PROCEDURAL COMPLICATIONS	2.58 ( 2.09 - 3.18 )	2.56 ( 83.15 )	2.35-2.77	2.56 ( 2.15 )	1.36 ( -0.31 )
PNEUMONIA	86	INFECTIONS AND INFESTATIONS	1.55 ( 1.26 - 1.92 )	1.55 ( 16.88 )	1.34-1.76	1.55 ( 1.3 )	0.63 ( -1.03 )
ANAEMIA	85	BLOOD AND LYMPHATIC SYSTEM DISORDERS	2.69 ( 2.17 - 3.33 )	2.67 ( 89.2 )	2.46-2.88	2.67 ( 2.23 )	1.42 ( -0.25 )
PRODUCT STORAGE ERROR	80	INJURY, POISONING AND PROCEDURAL COMPLICATIONS	6 ( 4.82 - 7.48 )	5.96 ( 330.38 )	5.74-6.18	5.96 ( 4.95 )	2.57 ( 0.91 )
AGRANULOCYTOSIS	67	BLOOD AND LYMPHATIC SYSTEM DISORDERS	24 ( 18.86 - 30.53 )	23.84 ( 1460.12 )	23.61-24.08	23.74 ( 19.41 )	4.57 ( 2.9 )
CYTOMEGALOVIRUS INFECTION REACTIVATION	67	INFECTIONS AND INFESTATIONS	156.86 ( 122.92 - 200.17 )	155.82 ( 10006.65 )	155.57-156.06	151.31 ( 123.39 )	7.24 ( 5.57 )
PYREXIA	66	GENERAL DISORDERS AND ADMINISTRATION SITE CONDITIONS	1.15 ( 0.91 - 1.47 )	1.15 ( 1.34 )	0.91-1.39	1.15 ( 0.94 )	0.21 ( -1.46 )
ACUTE KIDNEY INJURY	64	RENAL AND URINARY DISORDERS	2 ( 1.56 - 2.55 )	1.99 ( 31.55 )	1.74-2.23	1.99 ( 1.62 )	0.99 ( -0.67 )
RENAL IMPAIRMENT	63	RENAL AND URINARY DISORDERS	4.73 ( 3.69 - 6.06 )	4.71 ( 184.04 )	4.46-4.95	4.7 ( 3.82 )	2.23 ( 0.57 )
FEBRILE NEUTROPENIA	61	BLOOD AND LYMPHATIC SYSTEM DISORDERS	5.91 ( 4.59 - 7.6 )	5.88 ( 246.92 )	5.63-6.13	5.87 ( 4.76 )	2.55 ( 0.89 )
INTERCEPTED MEDICATION ERROR	55	INJURY, POISONING AND PROCEDURAL COMPLICATIONS	67.06 ( 51.36 - 87.56 )	66.7 ( 3514.54 )	66.44-66.97	65.87 ( 52.69 )	6.04 ( 4.37 )
NAUSEA	50	GASTROINTESTINAL DISORDERS	0.39 ( 0.29 - 0.51 )	0.39 ( 48.25 )	0.11-0.67	0.39 ( 0.31 )	-1.36 ( -3.02 )
SEPSIS	50	INFECTIONS AND INFESTATIONS	2.73 ( 2.07 - 3.61 )	2.72 ( 54.53 )	2.45-3	2.72 ( 2.16 )	1.44 ( -0.22 )
VOMITING	49	GASTROINTESTINAL DISORDERS	0.65 ( 0.49 - 0.86 )	0.65 ( 9.29 )	0.37-0.93	0.65 ( 0.51 )	-0.62 ( -2.29 )
INFECTION	49	INFECTIONS AND INFESTATIONS	2.17 ( 1.64 - 2.87 )	2.17 ( 30.79 )	1.89-2.44	2.16 ( 1.71 )	1.11 ( -0.55 )
CYTOPENIA	49	BLOOD AND LYMPHATIC SYSTEM DISORDERS	30.56 ( 23.06 - 40.49 )	30.41 ( 1385.86 )	30.13-30.69	30.24 ( 23.89 )	4.92 ( 3.25 )
TRANSPLANT REJECTION	48	IMMUNE SYSTEM DISORDERS	37.86 ( 28.48 - 50.32 )	37.68 ( 1701.9 )	37.4-37.97	37.42 ( 29.49 )	5.23 ( 3.56 )
CYTOMEGALOVIRUS COLITIS	47	INFECTIONS AND INFESTATIONS	152.26 ( 113.85 - 203.62 )	151.55 ( 6830.15 )	151.26-151.84	147.28 ( 115.48 )	7.2 ( 5.53 )
MYELOSUPPRESSION	47	BLOOD AND LYMPHATIC SYSTEM DISORDERS	14.58 ( 10.94 - 19.42 )	14.51 ( 589.85 )	14.23-14.8	14.47 ( 11.38 )	3.86 ( 2.19 )
WHITE BLOOD CELL COUNT DECREASED	47	INVESTIGATIONS	2.65 ( 1.99 - 3.53 )	2.64 ( 47.9 )	2.35-2.92	2.64 ( 2.08 )	1.4 ( -0.27 )
FATIGUE	44	GENERAL DISORDERS AND ADMINISTRATION SITE CONDITIONS	0.35 ( 0.26 - 0.47 )	0.35 ( 53.73 )	0.06-0.65	0.35 ( 0.27 )	-1.51 ( -3.18 )
MALAISE	43	GENERAL DISORDERS AND ADMINISTRATION SITE CONDITIONS	0.58 ( 0.43 - 0.78 )	0.58 ( 13.06 )	0.28-0.88	0.58 ( 0.45 )	-0.78 ( -2.45 )
ASTHENIA	39	GENERAL DISORDERS AND ADMINISTRATION SITE CONDITIONS	0.63 ( 0.46 - 0.87 )	0.63 ( 8.3 )	0.32-0.95	0.63 ( 0.49 )	-0.66 ( -2.32 )
CYTOMEGALOVIRUS TEST POSITIVE	39	INVESTIGATIONS	112.31 ( 81.73 - 154.32 )	111.87 ( 4195.24 )	111.56-112.19	109.54 ( 83.96 )	6.78 ( 5.11 )
TRANSPLANT DYSFUNCTION	38	INJURY, POISONING AND PROCEDURAL COMPLICATIONS	114.8 ( 83.19 - 158.42 )	114.37 ( 4178.56 )	114.05-114.69	111.93 ( 85.49 )	6.81 ( 5.14 )
SEPTIC SHOCK	37	INFECTIONS AND INFESTATIONS	5.45 ( 3.95 - 7.53 )	5.44 ( 133.9 )	5.11-5.76	5.43 ( 4.15 )	2.44 ( 0.78 )
BONE MARROW FAILURE	37	BLOOD AND LYMPHATIC SYSTEM DISORDERS	10.22 ( 7.4 - 14.12 )	10.19 ( 306.02 )	9.86-10.51	10.17 ( 7.76 )	3.35 ( 1.68 )
INTERCEPTED PRODUCT STORAGE ERROR	37	INJURY, POISONING AND PROCEDURAL COMPLICATIONS	101.16 ( 73.03 - 140.14 )	100.8 ( 3586.39 )	100.47-101.12	98.9 ( 75.29 )	6.63 ( 4.96 )
COVID-19	36	INFECTIONS AND INFESTATIONS	1.31 ( 0.94 - 1.81 )	1.31 ( 2.58 )	0.98-1.63	1.31 ( 0.99 )	0.38 ( -1.28 )
CYTOMEGALOVIRUS CHORIORETINITIS	34	INFECTIONS AND INFESTATIONS	117.82 ( 83.82 - 165.61 )	117.42 ( 3838.14 )	117.09-117.76	114.85 ( 86.38 )	6.84 ( 5.18 )
PNEUMONIA CYTOMEGALOVIRAL	33	INFECTIONS AND INFESTATIONS	113.22 ( 80.15 - 159.93 )	112.85 ( 3580.6 )	112.5-113.19	110.47 ( 82.74 )	6.79 ( 5.12 )
DECREASED APPETITE	32	METABOLISM AND NUTRITION DISORDERS	0.81 ( 0.58 - 1.15 )	0.81 ( 1.35 )	0.47-1.16	0.81 ( 0.61 )	-0.3 ( -1.96 )
BLINDNESS	30	EYE DISORDERS	4.63 ( 3.23 - 6.62 )	4.62 ( 85.01 )	4.26-4.98	4.61 ( 3.42 )	2.21 ( 0.54 )
NEUTROPHIL COUNT DECREASED	30	INVESTIGATIONS	4.71 ( 3.29 - 6.74 )	4.7 ( 87.39 )	4.34-5.06	4.7 ( 3.48 )	2.23 ( 0.57 )
PRODUCT USE ISSUE	30	INJURY, POISONING AND PROCEDURAL COMPLICATIONS	1.04 ( 0.72 - 1.48 )	1.03 ( 0.04 )	0.68-1.39	1.03 ( 0.77 )	0.05 ( -1.62 )
LYMPHOPENIA	29	BLOOD AND LYMPHATIC SYSTEM DISORDERS	12.85 ( 8.92 - 18.51 )	12.82 ( 315.24 )	12.45-13.18	12.79 ( 9.42 )	3.68 ( 2.01 )
RASH	29	SKIN AND SUBCUTANEOUS TISSUE DISORDERS	0.39 ( 0.27 - 0.57 )	0.4 ( 26.86 )	0.03-0.76	0.4 ( 0.29 )	-1.34 ( -3 )
CONDITION AGGRAVATED	29	GENERAL DISORDERS AND ADMINISTRATION SITE CONDITIONS	0.63 ( 0.43 - 0.9 )	0.63 ( 6.5 )	0.26-0.99	0.63 ( 0.46 )	-0.68 ( -2.34 )
CYTOMEGALOVIRUS SYNDROME	28	INFECTIONS AND INFESTATIONS	1258.14 ( 832.33 - 1901.79 )	1254.64 ( 28253.99 )	1254.22-1255.05	1010.87 ( 715.42 )	9.98 ( 8.3 )
DRUG INTERACTION	28	GENERAL DISORDERS AND ADMINISTRATION SITE CONDITIONS	1.07 ( 0.74 - 1.55 )	1.07 ( 0.13 )	0.7-1.44	1.07 ( 0.78 )	0.1 ( -1.57 )
ABDOMINAL PAIN	28	GASTROINTESTINAL DISORDERS	0.74 ( 0.51 - 1.07 )	0.74 ( 2.61 )	0.37-1.11	0.74 ( 0.54 )	-0.44 ( -2.1 )
VIRAL LOAD INCREASED	27	INVESTIGATIONS	45.42 ( 31.08 - 66.37 )	45.3 ( 1159.66 )	44.92-45.68	44.92 ( 32.7 )	5.49 ( 3.82 )
TREATMENT FAILURE	27	GENERAL DISORDERS AND ADMINISTRATION SITE CONDITIONS	2.16 ( 1.48 - 3.16 )	2.16 ( 16.84 )	1.78-2.54	2.16 ( 1.57 )	1.11 ( -0.56 )
RENAL FAILURE	27	RENAL AND URINARY DISORDERS	1.16 ( 0.79 - 1.69 )	1.16 ( 0.59 )	0.78-1.54	1.16 ( 0.85 )	0.21 ( -1.45 )
PLATELET COUNT DECREASED	26	INVESTIGATIONS	1.48 ( 1.01 - 2.18 )	1.48 ( 4.07 )	1.1-1.87	1.48 ( 1.07 )	0.57 ( -1.1 )
URINARY TRACT INFECTION	26	INFECTIONS AND INFESTATIONS	0.95 ( 0.64 - 1.39 )	0.95 ( 0.08 )	0.56-1.33	0.95 ( 0.69 )	-0.08 ( -1.74 )
NEPHROPATHY TOXIC	26	RENAL AND URINARY DISORDERS	15.48 ( 10.53 - 22.77 )	15.45 ( 350.31 )	15.06-15.83	15.4 ( 11.16 )	3.95 ( 2.28 )
DYSPNOEA	26	RESPIRATORY, THORACIC AND MEDIASTINAL DISORDERS	0.28 ( 0.19 - 0.41 )	0.28 ( 48.25 )	-0.1-0.66	0.28 ( 0.2 )	-1.83 ( -3.5 )
BLOOD CREATININE INCREASED	25	INVESTIGATIONS	2.27 ( 1.53 - 3.36 )	2.26 ( 17.67 )	1.87-2.66	2.26 ( 1.63 )	1.18 ( -0.49 )
OVERDOSE	24	INJURY, POISONING AND PROCEDURAL COMPLICATIONS	0.62 ( 0.42 - 0.93 )	0.63 ( 5.41 )	0.23-1.02	0.63 ( 0.45 )	-0.68 ( -2.34 )
CEREBROVASCULAR ACCIDENT	24	NERVOUS SYSTEM DISORDERS	0.83 ( 0.56 - 1.24 )	0.83 ( 0.82 )	0.43-1.23	0.83 ( 0.59 )	-0.27 ( -1.93 )
TOXICITY TO VARIOUS AGENTS	24	INJURY, POISONING AND PROCEDURAL COMPLICATIONS	0.81 ( 0.54 - 1.21 )	0.81 ( 1.04 )	0.41-1.21	0.81 ( 0.58 )	-0.3 ( -1.97 )
TREMOR	23	NERVOUS SYSTEM DISORDERS	0.83 ( 0.55 - 1.24 )	0.83 ( 0.83 )	0.42-1.24	0.83 ( 0.59 )	-0.27 ( -1.94 )
ILLNESS	23	GENERAL DISORDERS AND ADMINISTRATION SITE CONDITIONS	2.01 ( 1.33 - 3.02 )	2.01 ( 11.62 )	1.6-2.41	2.01 ( 1.42 )	1 ( -0.66 )
WEIGHT DECREASED	22	INVESTIGATIONS	0.48 ( 0.31 - 0.73 )	0.48 ( 12.5 )	0.06-0.9	0.48 ( 0.34 )	-1.06 ( -2.73 )
THROMBOCYTOSIS	22	BLOOD AND LYMPHATIC SYSTEM DISORDERS	32.82 ( 21.57 - 49.93 )	32.75 ( 672.9 )	32.33-33.17	32.55 ( 22.91 )	5.02 ( 3.36 )
DIZZINESS	21	NERVOUS SYSTEM DISORDERS	0.26 ( 0.17 - 0.39 )	0.26 ( 45.46 )	-0.17-0.68	0.26 ( 0.18 )	-1.96 ( -3.63 )
NEOPLASM MALIGNANT	21	NEOPLASMS BENIGN, MALIGNANT AND UNSPECIFIED (INCL CYSTS AND POLYPS)	1.97 ( 1.28 - 3.02 )	1.97 ( 9.99 )	1.54-2.39	1.97 ( 1.37 )	0.98 ( -0.69 )
DYSPHAGIA	21	GASTROINTESTINAL DISORDERS	1.3 ( 0.85 - 1.99 )	1.3 ( 1.45 )	0.87-1.73	1.3 ( 0.91 )	0.38 ( -1.29 )
COLITIS	21	GASTROINTESTINAL DISORDERS	3.62 ( 2.36 - 5.55 )	3.61 ( 39.66 )	3.18-4.04	3.61 ( 2.52 )	1.85 ( 0.19 )
CIRCUMSTANCE OR INFORMATION CAPABLE OF LEADING TO MEDICATION ERROR	21	INJURY, POISONING AND PROCEDURAL COMPLICATIONS	4.49 ( 2.92 - 6.88 )	4.48 ( 56.7 )	4.05-4.91	4.47 ( 3.13 )	2.16 ( 0.5 )
HYPERTENSION	20	VASCULAR DISORDERS	0.58 ( 0.37 - 0.89 )	0.58 ( 6.21 )	0.14-1.02	0.58 ( 0.4 )	-0.79 ( -2.46 )
ATRIAL FIBRILLATION	20	CARDIAC DISORDERS	1.25 ( 0.8 - 1.93 )	1.25 ( 0.97 )	0.81-1.68	1.25 ( 0.86 )	0.32 ( -1.35 )
VIRAL INFECTION	20	INFECTIONS AND INFESTATIONS	3.85 ( 2.48 - 5.97 )	3.84 ( 42.07 )	3.41-4.28	3.84 ( 2.66 )	1.94 ( 0.28 )
MULTIPLE ORGAN DYSFUNCTION SYNDROME	19	GENERAL DISORDERS AND ADMINISTRATION SITE CONDITIONS	2.6 ( 1.65 - 4.07 )	2.59 ( 18.59 )	2.14-3.04	2.59 ( 1.78 )	1.37 ( -0.29 )
THROMBOSIS	19	VASCULAR DISORDERS	1.42 ( 0.9 - 2.22 )	1.41 ( 2.31 )	0.97-1.86	1.41 ( 0.97 )	0.5 ( -1.17 )
HEADACHE	19	NERVOUS SYSTEM DISORDERS	0.18 ( 0.12 - 0.29 )	0.18 ( 69.49 )	-0.27-0.63	0.18 ( 0.13 )	-2.44 ( -4.11 )
HEPATOTOXICITY	19	HEPATOBILIARY DISORDERS	5.46 ( 3.48 - 8.57 )	5.45 ( 69.01 )	5-5.9	5.45 ( 3.74 )	2.45 ( 0.78 )
INSOMNIA	18	PSYCHIATRIC DISORDERS	0.4 ( 0.25 - 0.64 )	0.4 ( 15.83 )	-0.06-0.87	0.4 ( 0.27 )	-1.3 ( -2.97 )
CONFUSIONAL STATE	18	PSYCHIATRIC DISORDERS	0.67 ( 0.42 - 1.06 )	0.67 ( 2.91 )	0.21-1.13	0.67 ( 0.46 )	-0.58 ( -2.24 )
FALL	18	INJURY, POISONING AND PROCEDURAL COMPLICATIONS	0.33 ( 0.21 - 0.52 )	0.33 ( 24.74 )	-0.13-0.79	0.33 ( 0.22 )	-1.6 ( -3.27 )
DISEASE PROGRESSION	18	GENERAL DISORDERS AND ADMINISTRATION SITE CONDITIONS	0.97 ( 0.61 - 1.54 )	0.97 ( 0.02 )	0.51-1.43	0.97 ( 0.66 )	-0.04 ( -1.71 )
PAIN	18	GENERAL DISORDERS AND ADMINISTRATION SITE CONDITIONS	0.17 ( 0.11 - 0.27 )	0.17 ( 71.33 )	-0.29-0.64	0.17 ( 0.12 )	-2.52 ( -4.19 )
COUGH	18	RESPIRATORY, THORACIC AND MEDIASTINAL DISORDERS	0.4 ( 0.25 - 0.64 )	0.4 ( 15.94 )	-0.06-0.87	0.4 ( 0.27 )	-1.31 ( -2.98 )
EPSTEIN-BARR VIRUS INFECTION	18	INFECTIONS AND INFESTATIONS	18.56 ( 11.68 - 29.5 )	18.53 ( 297.49 )	18.07-18.99	18.47 ( 12.53 )	4.21 ( 2.54 )
OEDEMA PERIPHERAL	18	GENERAL DISORDERS AND ADMINISTRATION SITE CONDITIONS	0.86 ( 0.54 - 1.36 )	0.86 ( 0.44 )	0.39-1.32	0.86 ( 0.58 )	-0.23 ( -1.89 )
RESPIRATORY FAILURE	17	RESPIRATORY, THORACIC AND MEDIASTINAL DISORDERS	1.41 ( 0.87 - 2.26 )	1.41 ( 1.99 )	0.93-1.88	1.41 ( 0.94 )	0.49 ( -1.17 )
HEPATOCELLULAR INJURY	17	HEPATOBILIARY DISORDERS	5.82 ( 3.62 - 9.37 )	5.81 ( 67.67 )	5.34-6.29	5.81 ( 3.9 )	2.54 ( 0.87 )
THROMBOTIC MICROANGIOPATHY	17	BLOOD AND LYMPHATIC SYSTEM DISORDERS	11.77 ( 7.31 - 18.96 )	11.75 ( 166.93 )	11.28-12.23	11.73 ( 7.87 )	3.55 ( 1.89 )
HAEMOGLOBIN DECREASED	16	INVESTIGATIONS	0.92 ( 0.57 - 1.51 )	0.92 ( 0.1 )	0.44-1.41	0.92 ( 0.61 )	-0.11 ( -1.78 )
INTERSTITIAL LUNG DISEASE	16	RESPIRATORY, THORACIC AND MEDIASTINAL DISORDERS	2.11 ( 1.29 - 3.44 )	2.11 ( 9.3 )	1.62-2.6	2.11 ( 1.4 )	1.07 ( -0.59 )
INTENTIONAL PRODUCT MISUSE	16	INJURY, POISONING AND PROCEDURAL COMPLICATIONS	0.87 ( 0.53 - 1.41 )	0.87 ( 0.33 )	0.38-1.36	0.87 ( 0.57 )	-0.21 ( -1.87 )
HYPERGLYCAEMIA	16	METABOLISM AND NUTRITION DISORDERS	2.65 ( 1.62 - 4.32 )	2.64 ( 16.36 )	2.15-3.13	2.64 ( 1.75 )	1.4 ( -0.26 )
PRODUCT PRESCRIBING ERROR	16	INJURY, POISONING AND PROCEDURAL COMPLICATIONS	2.25 ( 1.38 - 3.67 )	2.25 ( 11.08 )	1.76-2.74	2.25 ( 1.49 )	1.17 ( -0.5 )
CYTOMEGALOVIRUS GASTROINTESTINAL INFECTION	15	INFECTIONS AND INFESTATIONS	348.59 ( 206.6 - 588.15 )	348.07 ( 4865.25 )	347.54-348.59	326.28 ( 210.62 )	8.35 ( 6.67 )
CHOLESTASIS	15	HEPATOBILIARY DISORDERS	4.96 ( 2.99 - 8.23 )	4.95 ( 47.31 )	4.45-5.46	4.95 ( 3.24 )	2.31 ( 0.64 )
PNEUMOCYSTIS JIROVECII PNEUMONIA	15	INFECTIONS AND INFESTATIONS	7.71 ( 4.65 - 12.8 )	7.7 ( 87.39 )	7.2-8.21	7.69 ( 5.03 )	2.94 ( 1.28 )
ENCEPHALITIS CYTOMEGALOVIRUS	15	INFECTIONS AND INFESTATIONS	269.25 ( 160.18 - 452.6 )	268.85 ( 3805.98 )	268.33-269.37	255.68 ( 165.56 )	8 ( 6.32 )
BK VIRUS INFECTION	15	INFECTIONS AND INFESTATIONS	32.89 ( 19.79 - 54.66 )	32.84 ( 460.2 )	32.33-33.35	32.64 ( 21.34 )	5.03 ( 3.36 )
SEIZURE	15	NERVOUS SYSTEM DISORDERS	0.53 ( 0.32 - 0.88 )	0.53 ( 6.32 )	0.02-1.03	0.53 ( 0.35 )	-0.92 ( -2.59 )
HYPERKALAEMIA	15	METABOLISM AND NUTRITION DISORDERS	2.65 ( 1.6 - 4.4 )	2.65 ( 15.41 )	2.14-3.16	2.65 ( 1.73 )	1.41 ( -0.26 )
VISUAL IMPAIRMENT	15	EYE DISORDERS	0.74 ( 0.44 - 1.22 )	0.74 ( 1.43 )	0.23-1.24	0.74 ( 0.48 )	-0.44 ( -2.11 )
PRURITUS	15	SKIN AND SUBCUTANEOUS TISSUE DISORDERS	0.25 ( 0.15 - 0.41 )	0.25 ( 33.8 )	-0.26-0.76	0.25 ( 0.16 )	-2 ( -3.66 )
HAEMATOTOXICITY	15	BLOOD AND LYMPHATIC SYSTEM DISORDERS	11.21 ( 6.75 - 18.61 )	11.2 ( 138.99 )	10.69-11.7	11.17 ( 7.31 )	3.48 ( 1.82 )
ALOPECIA	15	SKIN AND SUBCUTANEOUS TISSUE DISORDERS	0.46 ( 0.28 - 0.76 )	0.46 ( 9.69 )	-0.05-0.96	0.46 ( 0.3 )	-1.13 ( -2.79 )
GENE MUTATION	15	CONGENITAL, FAMILIAL AND GENETIC DISORDERS	48.53 ( 29.18 - 80.72 )	48.46 ( 690.74 )	47.95-48.96	48.02 ( 31.37 )	5.59 ( 3.92 )
CARDIAC ARREST	14	CARDIAC DISORDERS	1.01 ( 0.6 - 1.71 )	1.01 ( 0 )	0.49-1.53	1.01 ( 0.65 )	0.01 ( -1.65 )
PLEURAL EFFUSION	14	RESPIRATORY, THORACIC AND MEDIASTINAL DISORDERS	1.38 ( 0.82 - 2.33 )	1.38 ( 1.47 )	0.86-1.9	1.38 ( 0.89 )	0.46 ( -1.2 )
GASTROINTESTINAL DISORDER	14	GASTROINTESTINAL DISORDERS	0.72 ( 0.43 - 1.22 )	0.72 ( 1.49 )	0.2-1.25	0.72 ( 0.47 )	-0.47 ( -2.13 )
PRODUCT DOSE OMISSION ISSUE	14	INJURY, POISONING AND PROCEDURAL COMPLICATIONS	0.18 ( 0.11 - 0.31 )	0.18 ( 51.77 )	-0.34-0.71	0.18 ( 0.12 )	-2.46 ( -4.12 )
FULL BLOOD COUNT ABNORMAL	14	INVESTIGATIONS	3.11 ( 1.84 - 5.25 )	3.1 ( 19.95 )	2.58-3.63	3.1 ( 2 )	1.63 ( -0.03 )
OEDEMA	13	GENERAL DISORDERS AND ADMINISTRATION SITE CONDITIONS	1.48 ( 0.86 - 2.55 )	1.48 ( 2.02 )	0.94-2.02	1.48 ( 0.94 )	0.56 ( -1.1 )
FOETAL EXPOSURE DURING PREGNANCY	13	INJURY, POISONING AND PROCEDURAL COMPLICATIONS	0.97 ( 0.56 - 1.68 )	0.97 ( 0.01 )	0.43-1.52	0.97 ( 0.62 )	-0.04 ( -1.71 )
GENERAL PHYSICAL HEALTH DETERIORATION	13	GENERAL DISORDERS AND ADMINISTRATION SITE CONDITIONS	0.75 ( 0.44 - 1.3 )	0.75 ( 1.04 )	0.21-1.3	0.75 ( 0.48 )	-0.41 ( -2.07 )
WEIGHT INCREASED	13	INVESTIGATIONS	0.36 ( 0.21 - 0.62 )	0.36 ( 14.79 )	-0.18-0.9	0.36 ( 0.23 )	-1.47 ( -3.14 )
ANXIETY	13	PSYCHIATRIC DISORDERS	0.27 ( 0.16 - 0.47 )	0.27 ( 25.59 )	-0.27-0.81	0.27 ( 0.17 )	-1.88 ( -3.55 )
ACUTE RESPIRATORY FAILURE	13	RESPIRATORY, THORACIC AND MEDIASTINAL DISORDERS	4.35 ( 2.52 - 7.49 )	4.34 ( 33.43 )	3.8-4.89	4.34 ( 2.75 )	2.12 ( 0.45 )
MYALGIA	13	MUSCULOSKELETAL AND CONNECTIVE TISSUE DISORDERS	0.46 ( 0.27 - 0.8 )	0.46 ( 8.03 )	-0.08-1.01	0.46 ( 0.29 )	-1.1 ( -2.77 )
MEDICATION ERROR	13	INJURY, POISONING AND PROCEDURAL COMPLICATIONS	1.44 ( 0.83 - 2.48 )	1.44 ( 1.72 )	0.89-1.98	1.44 ( 0.91 )	0.52 ( -1.14 )
SQUAMOUS CELL CARCINOMA OF SKIN	13	NEOPLASMS BENIGN, MALIGNANT AND UNSPECIFIED (INCL CYSTS AND POLYPS)	13.92 ( 8.07 - 23.99 )	13.9 ( 155.24 )	13.36-14.44	13.87 ( 8.79 )	3.79 ( 2.13 )
ASPERGILLUS INFECTION	12	INFECTIONS AND INFESTATIONS	9.87 ( 5.6 - 17.39 )	9.86 ( 95.35 )	9.29-10.42	9.84 ( 6.13 )	3.3 ( 1.63 )
DEHYDRATION	12	METABOLISM AND NUTRITION DISORDERS	0.54 ( 0.31 - 0.95 )	0.54 ( 4.68 )	-0.02-1.11	0.54 ( 0.34 )	-0.89 ( -2.55 )
HYPONATRAEMIA	12	METABOLISM AND NUTRITION DISORDERS	1.29 ( 0.73 - 2.26 )	1.28 ( 0.76 )	0.72-1.85	1.28 ( 0.8 )	0.36 ( -1.3 )
ENCEPHALOPATHY	12	NERVOUS SYSTEM DISORDERS	3.05 ( 1.73 - 5.38 )	3.05 ( 16.56 )	2.49-3.62	3.05 ( 1.9 )	1.61 ( -0.06 )
BRONCHOPULMONARY ASPERGILLOSIS	12	INFECTIONS AND INFESTATIONS	9.86 ( 5.59 - 17.37 )	9.85 ( 95.2 )	9.28-10.41	9.83 ( 6.12 )	3.3 ( 1.63 )
HYPOTENSION	12	VASCULAR DISORDERS	0.36 ( 0.21 - 0.64 )	0.36 ( 13.37 )	-0.2-0.93	0.36 ( 0.23 )	-1.46 ( -3.12 )
CYTOMEGALOVIRUS OESOPHAGITIS	12	INFECTIONS AND INFESTATIONS	219.89 ( 123.36 - 391.93 )	219.62 ( 2505.69 )	219.05-220.2	210.76 ( 129.95 )	7.72 ( 6.04 )
POLYOMAVIRUS-ASSOCIATED NEPHROPATHY	11	INFECTIONS AND INFESTATIONS	33.97 ( 18.77 - 61.48 )	33.93 ( 349.31 )	33.34-34.52	33.72 ( 20.53 )	5.08 ( 3.41 )
BACTERIAL INFECTION	11	INFECTIONS AND INFESTATIONS	3.75 ( 2.08 - 6.78 )	3.75 ( 22.19 )	3.16-4.34	3.75 ( 2.29 )	1.91 ( 0.24 )
KIDNEY TRANSPLANT REJECTION	11	IMMUNE SYSTEM DISORDERS	13.62 ( 7.53 - 24.62 )	13.61 ( 128.16 )	13.02-14.2	13.57 ( 8.27 )	3.76 ( 2.1 )
GAIT DISTURBANCE	11	GENERAL DISORDERS AND ADMINISTRATION SITE CONDITIONS	0.33 ( 0.18 - 0.6 )	0.33 ( 14.61 )	-0.26-0.93	0.33 ( 0.2 )	-1.58 ( -3.25 )
ACUTE GRAFT VERSUS HOST DISEASE	11	IMMUNE SYSTEM DISORDERS	14.96 ( 8.27 - 27.04 )	14.94 ( 142.72 )	14.35-15.54	14.9 ( 9.08 )	3.9 ( 2.23 )
NEUROPATHY PERIPHERAL	11	NERVOUS SYSTEM DISORDERS	0.73 ( 0.41 - 1.33 )	0.74 ( 1.05 )	0.14-1.33	0.74 ( 0.45 )	-0.44 ( -2.11 )
CONSTIPATION	11	GASTROINTESTINAL DISORDERS	0.33 ( 0.18 - 0.59 )	0.33 ( 15.37 )	-0.26-0.92	0.33 ( 0.2 )	-1.62 ( -3.28 )
RENAL DISORDER	11	RENAL AND URINARY DISORDERS	1.43 ( 0.79 - 2.59 )	1.43 ( 1.43 )	0.84-2.02	1.43 ( 0.87 )	0.52 ( -1.15 )
PNEUMONITIS	11	RESPIRATORY, THORACIC AND MEDIASTINAL DISORDERS	2.67 ( 1.48 - 4.83 )	2.67 ( 11.52 )	2.08-3.26	2.67 ( 1.63 )	1.42 ( -0.25 )
HEPATIC FUNCTION ABNORMAL	10	HEPATOBILIARY DISORDERS	1.72 ( 0.92 - 3.19 )	1.72 ( 2.98 )	1.1-2.33	1.71 ( 1.02 )	0.78 ( -0.89 )
FUNGAL INFECTION	10	INFECTIONS AND INFESTATIONS	1.84 ( 0.99 - 3.42 )	1.84 ( 3.84 )	1.22-2.46	1.84 ( 1.1 )	0.88 ( -0.79 )
BLOOD PRESSURE INCREASED	10	INVESTIGATIONS	0.39 ( 0.21 - 0.73 )	0.39 ( 9.36 )	-0.23-1.01	0.39 ( 0.23 )	-1.34 ( -3.01 )
DISEASE RECURRENCE	10	GENERAL DISORDERS AND ADMINISTRATION SITE CONDITIONS	1.39 ( 0.75 - 2.58 )	1.39 ( 1.09 )	0.77-2.01	1.39 ( 0.83 )	0.47 ( -1.19 )
GRAFT VERSUS HOST DISEASE	10	IMMUNE SYSTEM DISORDERS	8.32 ( 4.47 - 15.48 )	8.31 ( 64.23 )	7.69-8.93	8.3 ( 4.94 )	3.05 ( 1.39 )
SWELLING	10	GENERAL DISORDERS AND ADMINISTRATION SITE CONDITIONS	0.54 ( 0.29 - 1.01 )	0.54 ( 3.84 )	-0.08-1.16	0.54 ( 0.32 )	-0.88 ( -2.55 )
HYPOAESTHESIA	10	NERVOUS SYSTEM DISORDERS	0.4 ( 0.21 - 0.74 )	0.4 ( 9.18 )	-0.22-1.02	0.4 ( 0.24 )	-1.33 ( -3 )
GAMMA-GLUTAMYLTRANSFERASE INCREASED	10	INVESTIGATIONS	2.59 ( 1.39 - 4.82 )	2.59 ( 9.77 )	1.97-3.21	2.59 ( 1.54 )	1.37 ( -0.29 )
HEPATITIS	10	HEPATOBILIARY DISORDERS	2.42 ( 1.3 - 4.5 )	2.42 ( 8.34 )	1.8-3.04	2.42 ( 1.44 )	1.28 ( -0.39 )
HAEMATURIA	10	RENAL AND URINARY DISORDERS	1.71 ( 0.92 - 3.19 )	1.71 ( 2.97 )	1.09-2.33	1.71 ( 1.02 )	0.78 ( -0.89 )
HYPERHIDROSIS	10	SKIN AND SUBCUTANEOUS TISSUE DISORDERS	0.46 ( 0.25 - 0.86 )	0.46 ( 6.3 )	-0.16-1.08	0.46 ( 0.27 )	-1.12 ( -2.78 )
VISION BLURRED	10	EYE DISORDERS	0.45 ( 0.24 - 0.85 )	0.46 ( 6.53 )	-0.16-1.07	0.46 ( 0.27 )	-1.14 ( -2.8 )
INCORRECT DOSE ADMINISTERED	10	INJURY, POISONING AND PROCEDURAL COMPLICATIONS	0.32 ( 0.17 - 0.59 )	0.32 ( 14.63 )	-0.3-0.94	0.32 ( 0.19 )	-1.65 ( -3.32 )
HAEMATOCHEZIA	10	GASTROINTESTINAL DISORDERS	1.14 ( 0.61 - 2.12 )	1.14 ( 0.17 )	0.52-1.76	1.14 ( 0.68 )	0.19 ( -1.48 )
HEPATIC FAILURE	10	HEPATOBILIARY DISORDERS	1.98 ( 1.07 - 3.69 )	1.98 ( 4.86 )	1.36-2.6	1.98 ( 1.18 )	0.99 ( -0.68 )
ILL-DEFINED DISORDER	10	GENERAL DISORDERS AND ADMINISTRATION SITE CONDITIONS	1.03 ( 0.56 - 1.92 )	1.03 ( 0.01 )	0.41-1.65	1.03 ( 0.61 )	0.05 ( -1.62 )
BACK PAIN	10	MUSCULOSKELETAL AND CONNECTIVE TISSUE DISORDERS	0.26 ( 0.14 - 0.48 )	0.26 ( 21.33 )	-0.36-0.88	0.26 ( 0.15 )	-1.95 ( -3.62 )
CYTOMEGALOVIRUS ENTERITIS	10	INFECTIONS AND INFESTATIONS	183.85 ( 97.82 - 345.53 )	183.67 ( 1754.73 )	183.04-184.3	177.43 ( 104.65 )	7.47 ( 5.8 )
RENAL ARTERY STENOSIS	10	RENAL AND URINARY DISORDERS	41.03 ( 22.02 - 76.47 )	40.99 ( 387.12 )	40.37-41.61	40.68 ( 24.16 )	5.35 ( 3.68 )
ELECTROLYTE IMBALANCE	10	METABOLISM AND NUTRITION DISORDERS	5.53 ( 2.97 - 10.28 )	5.52 ( 36.99 )	4.9-6.14	5.52 ( 3.28 )	2.46 ( 0.8 )
METABOLIC ACIDOSIS	10	METABOLISM AND NUTRITION DISORDERS	2 ( 1.07 - 3.71 )	2 ( 4.97 )	1.38-2.62	2 ( 1.19 )	1 ( -0.67 )
SKIN CANCER	10	NEOPLASMS BENIGN, MALIGNANT AND UNSPECIFIED (INCL CYSTS AND POLYPS)	2.87 ( 1.55 - 5.35 )	2.87 ( 12.21 )	2.25-3.49	2.87 ( 1.71 )	1.52 ( -0.14 )
BICYTOPENIA	10	BLOOD AND LYMPHATIC SYSTEM DISORDERS	36.36 ( 19.51 - 67.74 )	36.32 ( 341.13 )	35.7-36.94	36.08 ( 21.43 )	5.17 ( 3.51 )
RECTAL HAEMORRHAGE	9	GASTROINTESTINAL DISORDERS	1.25 ( 0.65 - 2.4 )	1.25 ( 0.44 )	0.59-1.9	1.25 ( 0.72 )	0.32 ( -1.35 )
HEPATIC ENZYME INCREASED	9	INVESTIGATIONS	0.85 ( 0.44 - 1.63 )	0.85 ( 0.25 )	0.19-1.5	0.85 ( 0.49 )	-0.24 ( -1.9 )
PSEUDOMONAS INFECTION	9	INFECTIONS AND INFESTATIONS	6.89 ( 3.58 - 13.25 )	6.89 ( 45.22 )	6.23-7.54	6.88 ( 3.98 )	2.78 ( 1.12 )
COLITIS ULCERATIVE	9	GASTROINTESTINAL DISORDERS	1.41 ( 0.73 - 2.71 )	1.41 ( 1.06 )	0.75-2.06	1.41 ( 0.81 )	0.49 ( -1.17 )
MYOCARDIAL INFARCTION	9	CARDIAC DISORDERS	0.29 ( 0.15 - 0.56 )	0.29 ( 15.73 )	-0.36-0.94	0.29 ( 0.17 )	-1.79 ( -3.45 )
ASCITES	9	GASTROINTESTINAL DISORDERS	1.84 ( 0.96 - 3.53 )	1.84 ( 3.43 )	1.18-2.49	1.84 ( 1.06 )	0.88 ( -0.79 )
VIRAL MUTATION IDENTIFIED	9	INVESTIGATIONS	13.92 ( 7.24 - 26.79 )	13.91 ( 107.56 )	13.26-14.56	13.88 ( 8.02 )	3.79 ( 2.13 )
PARAESTHESIA	9	NERVOUS SYSTEM DISORDERS	0.34 ( 0.18 - 0.65 )	0.34 ( 11.65 )	-0.31-0.99	0.34 ( 0.2 )	-1.56 ( -3.23 )
MUCORMYCOSIS	9	INFECTIONS AND INFESTATIONS	18.45 ( 9.58 - 35.51 )	18.43 ( 147.86 )	17.78-19.09	18.37 ( 10.62 )	4.2 ( 2.53 )
DRUG HYPERSENSITIVITY	9	IMMUNE SYSTEM DISORDERS	0.27 ( 0.14 - 0.53 )	0.27 ( 17.31 )	-0.38-0.93	0.27 ( 0.16 )	-1.86 ( -3.53 )
HYPOGAMMAGLOBULINAEMIA	9	IMMUNE SYSTEM DISORDERS	10.74 ( 5.58 - 20.65 )	10.73 ( 79.22 )	10.07-11.38	10.71 ( 6.19 )	3.42 ( 1.75 )
ARTHRALGIA	9	MUSCULOSKELETAL AND CONNECTIVE TISSUE DISORDERS	0.13 ( 0.07 - 0.26 )	0.13 ( 50.22 )	-0.52-0.79	0.14 ( 0.08 )	-2.89 ( -4.55 )
ACUTE RESPIRATORY DISTRESS SYNDROME	9	RESPIRATORY, THORACIC AND MEDIASTINAL DISORDERS	3.11 ( 1.62 - 5.98 )	3.11 ( 12.85 )	2.45-3.76	3.1 ( 1.8 )	1.63 ( -0.03 )
CHEST PAIN	9	GENERAL DISORDERS AND ADMINISTRATION SITE CONDITIONS	0.29 ( 0.15 - 0.55 )	0.29 ( 15.78 )	-0.36-0.94	0.29 ( 0.17 )	-1.79 ( -3.46 )
CATARACT	9	EYE DISORDERS	0.97 ( 0.5 - 1.86 )	0.97 ( 0.01 )	0.31-1.62	0.97 ( 0.56 )	-0.05 ( -1.71 )
ABDOMINAL DISCOMFORT	9	GASTROINTESTINAL DISORDERS	0.32 ( 0.17 - 0.62 )	0.32 ( 12.78 )	-0.33-0.98	0.32 ( 0.19 )	-1.63 ( -3.3 )
IMMUNOSUPPRESSION	9	IMMUNE SYSTEM DISORDERS	7.07 ( 3.67 - 13.59 )	7.06 ( 46.77 )	6.41-7.71	7.05 ( 4.08 )	2.82 ( 1.15 )
PRODUCTIVE COUGH	9	RESPIRATORY, THORACIC AND MEDIASTINAL DISORDERS	1.24 ( 0.64 - 2.38 )	1.24 ( 0.41 )	0.58-1.89	1.24 ( 0.72 )	0.31 ( -1.36 )
HYPOMAGNESAEMIA	9	METABOLISM AND NUTRITION DISORDERS	4.14 ( 2.15 - 7.97 )	4.14 ( 21.43 )	3.49-4.79	4.14 ( 2.39 )	2.05 ( 0.38 )
BACTERAEMIA	9	INFECTIONS AND INFESTATIONS	4.93 ( 2.56 - 9.47 )	4.92 ( 28.1 )	4.27-5.57	4.92 ( 2.85 )	2.3 ( 0.63 )
DIABETES MELLITUS	9	METABOLISM AND NUTRITION DISORDERS	0.69 ( 0.36 - 1.33 )	0.69 ( 1.24 )	0.04-1.34	0.69 ( 0.4 )	-0.53 ( -2.2 )
DEPRESSED LEVEL OF CONSCIOUSNESS	8	NERVOUS SYSTEM DISORDERS	1.21 ( 0.61 - 2.42 )	1.21 ( 0.3 )	0.52-1.9	1.21 ( 0.68 )	0.28 ( -1.39 )
BRADYCARDIA	8	CARDIAC DISORDERS	0.89 ( 0.44 - 1.78 )	0.89 ( 0.11 )	0.2-1.58	0.89 ( 0.5 )	-0.17 ( -1.84 )
HYPERSENSITIVITY	8	IMMUNE SYSTEM DISORDERS	0.26 ( 0.13 - 0.53 )	0.26 ( 16.37 )	-0.43-0.96	0.26 ( 0.15 )	-1.92 ( -3.58 )
CHRONIC KIDNEY DISEASE	8	RENAL AND URINARY DISORDERS	0.52 ( 0.26 - 1.05 )	0.52 ( 3.46 )	-0.17-1.22	0.52 ( 0.29 )	-0.93 ( -2.6 )
CLOSTRIDIUM DIFFICILE COLITIS	8	INFECTIONS AND INFESTATIONS	4.65 ( 2.32 - 9.3 )	4.65 ( 22.87 )	3.95-5.34	4.64 ( 2.6 )	2.21 ( 0.55 )
CHILLS	8	GENERAL DISORDERS AND ADMINISTRATION SITE CONDITIONS	0.41 ( 0.2 - 0.82 )	0.41 ( 6.81 )	-0.28-1.1	0.41 ( 0.23 )	-1.29 ( -2.95 )
LIVER DISORDER	8	HEPATOBILIARY DISORDERS	1.13 ( 0.56 - 2.25 )	1.13 ( 0.11 )	0.43-1.82	1.13 ( 0.63 )	0.17 ( -1.49 )
TACHYCARDIA	8	CARDIAC DISORDERS	0.55 ( 0.28 - 1.1 )	0.55 ( 2.94 )	-0.14-1.24	0.55 ( 0.31 )	-0.86 ( -2.53 )
THERAPY NON-RESPONDER	8	GENERAL DISORDERS AND ADMINISTRATION SITE CONDITIONS	0.93 ( 0.46 - 1.85 )	0.93 ( 0.05 )	0.23-1.62	0.93 ( 0.52 )	-0.11 ( -1.78 )
SWELLING FACE	8	GENERAL DISORDERS AND ADMINISTRATION SITE CONDITIONS	0.75 ( 0.38 - 1.51 )	0.75 ( 0.64 )	0.06-1.45	0.75 ( 0.42 )	-0.41 ( -2.07 )
LUNG TRANSPLANT REJECTION	8	IMMUNE SYSTEM DISORDERS	77.06 ( 38.33 - 154.93 )	77 ( 591.38 )	76.31-77.7	75.89 ( 42.31 )	6.25 ( 4.58 )
ALANINE AMINOTRANSFERASE INCREASED	8	INVESTIGATIONS	0.77 ( 0.39 - 1.54 )	0.77 ( 0.54 )	0.08-1.46	0.77 ( 0.43 )	-0.37 ( -2.04 )
RED BLOOD CELL COUNT DECREASED	8	INVESTIGATIONS	1.69 ( 0.84 - 3.38 )	1.69 ( 2.24 )	0.99-2.38	1.69 ( 0.94 )	0.75 ( -0.91 )
DEEP VEIN THROMBOSIS	8	VASCULAR DISORDERS	0.71 ( 0.35 - 1.41 )	0.71 ( 0.98 )	0.01-1.4	0.71 ( 0.39 )	-0.5 ( -2.17 )
HEPATOMEGALY	8	HEPATOBILIARY DISORDERS	4.66 ( 2.33 - 9.32 )	4.66 ( 22.96 )	3.96-5.35	4.65 ( 2.61 )	2.22 ( 0.55 )
GASTROINTESTINAL HAEMORRHAGE	8	GASTROINTESTINAL DISORDERS	0.55 ( 0.27 - 1.09 )	0.55 ( 3.01 )	-0.15-1.24	0.55 ( 0.31 )	-0.87 ( -2.54 )
LYMPHOMA	8	NEOPLASMS BENIGN, MALIGNANT AND UNSPECIFIED (INCL CYSTS AND POLYPS)	3.08 ( 1.54 - 6.16 )	3.08 ( 11.2 )	2.38-3.77	3.07 ( 1.72 )	1.62 ( -0.05 )
PAIN IN EXTREMITY	8	MUSCULOSKELETAL AND CONNECTIVE TISSUE DISORDERS	0.16 ( 0.08 - 0.32 )	0.16 ( 35.47 )	-0.53-0.85	0.16 ( 0.09 )	-2.64 ( -4.31 )
GASTROOESOPHAGEAL REFLUX DISEASE	8	GASTROINTESTINAL DISORDERS	0.61 ( 0.31 - 1.22 )	0.61 ( 1.98 )	-0.08-1.3	0.61 ( 0.34 )	-0.71 ( -2.38 )
NEUTROPENIA NEONATAL	8	BLOOD AND LYMPHATIC SYSTEM DISORDERS	223.74 ( 110.22 - 454.16 )	223.56 ( 1699.43 )	222.85-224.27	214.38 ( 118.55 )	7.74 ( 6.07 )
DISSEMINATED INTRAVASCULAR COAGULATION	8	BLOOD AND LYMPHATIC SYSTEM DISORDERS	3.31 ( 1.66 - 6.63 )	3.31 ( 12.91 )	2.62-4.01	3.31 ( 1.85 )	1.73 ( 0.06 )
STAPHYLOCOCCAL SEPSIS	8	INFECTIONS AND INFESTATIONS	9.38 ( 4.69 - 18.78 )	9.38 ( 59.77 )	8.68-10.07	9.36 ( 5.24 )	3.23 ( 1.56 )
DRUG INEFFECTIVE FOR UNAPPROVED INDICATION	8	GENERAL DISORDERS AND ADMINISTRATION SITE CONDITIONS	0.97 ( 0.49 - 1.95 )	0.97 ( 0.01 )	0.28-1.67	0.97 ( 0.54 )	-0.04 ( -1.71 )
HYPERBILIRUBINAEMIA	8	HEPATOBILIARY DISORDERS	4.89 ( 2.44 - 9.79 )	4.89 ( 24.72 )	4.19-5.58	4.88 ( 2.73 )	2.29 ( 0.62 )
HOSPITALISATION	8	SURGICAL AND MEDICAL PROCEDURES	0.35 ( 0.18 - 0.71 )	0.35 ( 9.47 )	-0.34-1.05	0.35 ( 0.2 )	-1.5 ( -3.17 )
HAEMOPHAGOCYTIC LYMPHOHISTIOCYTOSIS	8	IMMUNE SYSTEM DISORDERS	5.58 ( 2.79 - 11.17 )	5.58 ( 30.03 )	4.89-6.27	5.57 ( 3.12 )	2.48 ( 0.81 )
IMMUNE RECONSTITUTION INFLAMMATORY SYNDROME	8	IMMUNE SYSTEM DISORDERS	7.42 ( 3.71 - 14.85 )	7.42 ( 44.35 )	6.72-8.11	7.41 ( 4.15 )	2.89 ( 1.22 )
DEAFNESS	8	EAR AND LABYRINTH DISORDERS	1.91 ( 0.96 - 3.82 )	1.91 ( 3.47 )	1.22-2.6	1.91 ( 1.07 )	0.93 ( -0.73 )
NOROVIRUS INFECTION	8	INFECTIONS AND INFESTATIONS	93.73 ( 46.57 - 188.64 )	93.65 ( 720.34 )	92.95-94.35	92.01 ( 51.25 )	6.52 ( 4.85 )
STAPHYLOCOCCAL INFECTION	7	INFECTIONS AND INFESTATIONS	1.25 ( 0.59 - 2.62 )	1.25 ( 0.34 )	0.51-1.99	1.25 ( 0.67 )	0.32 ( -1.35 )
HALLUCINATION	7	PSYCHIATRIC DISORDERS	0.59 ( 0.28 - 1.23 )	0.59 ( 2.06 )	-0.16-1.33	0.59 ( 0.31 )	-0.77 ( -2.44 )
BLOOD POTASSIUM INCREASED	7	INVESTIGATIONS	2.59 ( 1.23 - 5.43 )	2.59 ( 6.82 )	1.85-3.33	2.59 ( 1.39 )	1.37 ( -0.3 )
DYSPNOEA EXERTIONAL	7	RESPIRATORY, THORACIC AND MEDIASTINAL DISORDERS	1.19 ( 0.57 - 2.49 )	1.19 ( 0.21 )	0.45-1.93	1.19 ( 0.64 )	0.25 ( -1.42 )
POOR QUALITY PRODUCT ADMINISTERED	7	INJURY, POISONING AND PROCEDURAL COMPLICATIONS	2.87 ( 1.37 - 6.02 )	2.87 ( 8.51 )	2.13-3.61	2.87 ( 1.54 )	1.52 ( -0.15 )
URTICARIA	7	SKIN AND SUBCUTANEOUS TISSUE DISORDERS	0.27 ( 0.13 - 0.56 )	0.27 ( 14.13 )	-0.47-1.01	0.27 ( 0.14 )	-1.91 ( -3.57 )
ENCEPHALITIS	7	INFECTIONS AND INFESTATIONS	6.47 ( 3.08 - 13.58 )	6.47 ( 32.32 )	5.73-7.21	6.46 ( 3.47 )	2.69 ( 1.03 )
HALLUCINATION, VISUAL	7	PSYCHIATRIC DISORDERS	2.13 ( 1.01 - 4.46 )	2.13 ( 4.17 )	1.38-2.87	2.12 ( 1.14 )	1.09 ( -0.58 )
UNDERDOSE	7	INJURY, POISONING AND PROCEDURAL COMPLICATIONS	0.59 ( 0.28 - 1.25 )	0.6 ( 1.93 )	-0.15-1.34	0.6 ( 0.32 )	-0.75 ( -2.42 )
DYSURIA	7	RENAL AND URINARY DISORDERS	1.13 ( 0.54 - 2.37 )	1.13 ( 0.11 )	0.39-1.87	1.13 ( 0.61 )	0.18 ( -1.49 )
PRESYNCOPE	7	NERVOUS SYSTEM DISORDERS	1.8 ( 0.86 - 3.79 )	1.8 ( 2.51 )	1.06-2.54	1.8 ( 0.97 )	0.85 ( -0.82 )
VERTIGO	7	EAR AND LABYRINTH DISORDERS	0.69 ( 0.33 - 1.44 )	0.69 ( 0.99 )	-0.05-1.43	0.69 ( 0.37 )	-0.54 ( -2.2 )
CYTOMEGALOVIRUS HEPATITIS	7	INFECTIONS AND INFESTATIONS	120.16 ( 56.79 - 254.28 )	120.08 ( 807.96 )	119.33-120.83	117.39 ( 62.7 )	6.88 ( 5.2 )
CEREBRAL HAEMORRHAGE	7	NERVOUS SYSTEM DISORDERS	1.18 ( 0.56 - 2.47 )	1.18 ( 0.19 )	0.44-1.92	1.18 ( 0.63 )	0.24 ( -1.43 )
UPPER RESPIRATORY TRACT INFECTION	7	INFECTIONS AND INFESTATIONS	0.94 ( 0.45 - 1.97 )	0.94 ( 0.03 )	0.2-1.68	0.94 ( 0.5 )	-0.09 ( -1.76 )
ABSCESS	7	INFECTIONS AND INFESTATIONS	2.66 ( 1.27 - 5.58 )	2.66 ( 7.24 )	1.92-3.4	2.66 ( 1.43 )	1.41 ( -0.26 )
MEMORY IMPAIRMENT	7	NERVOUS SYSTEM DISORDERS	0.31 ( 0.15 - 0.64 )	0.31 ( 11.01 )	-0.43-1.05	0.31 ( 0.16 )	-1.71 ( -3.37 )
RETINAL DETACHMENT	7	EYE DISORDERS	4.74 ( 2.26 - 9.94 )	4.73 ( 20.6 )	3.99-5.48	4.73 ( 2.54 )	2.24 ( 0.58 )
RHINOVIRUS INFECTION	7	INFECTIONS AND INFESTATIONS	14.17 ( 6.75 - 29.75 )	14.16 ( 85.37 )	13.42-14.9	14.12 ( 7.59 )	3.82 ( 2.15 )
MATERNAL EXPOSURE DURING PREGNANCY	7	INJURY, POISONING AND PROCEDURAL COMPLICATIONS	0.54 ( 0.26 - 1.13 )	0.54 ( 2.74 )	-0.2-1.28	0.54 ( 0.29 )	-0.89 ( -2.55 )
ERYTHEMA	7	SKIN AND SUBCUTANEOUS TISSUE DISORDERS	0.2 ( 0.1 - 0.42 )	0.2 ( 22.15 )	-0.54-0.94	0.2 ( 0.11 )	-2.31 ( -3.97 )
PNEUMOTHORAX	7	RESPIRATORY, THORACIC AND MEDIASTINAL DISORDERS	2.54 ( 1.21 - 5.34 )	2.54 ( 6.55 )	1.8-3.28	2.54 ( 1.37 )	1.35 ( -0.32 )
MOUTH ULCERATION	7	GASTROINTESTINAL DISORDERS	2.09 ( 0.99 - 4.38 )	2.08 ( 3.95 )	1.34-2.83	2.08 ( 1.12 )	1.06 ( -0.61 )
GRAFT VERSUS HOST DISEASE IN GASTROINTESTINAL TRACT	7	IMMUNE SYSTEM DISORDERS	19.91 ( 9.47 - 41.83 )	19.89 ( 125.13 )	19.15-20.64	19.82 ( 10.65 )	4.31 ( 2.64 )
POST TRANSPLANT LYMPHOPROLIFERATIVE DISORDER	7	NEOPLASMS BENIGN, MALIGNANT AND UNSPECIFIED (INCL CYSTS AND POLYPS)	9.72 ( 4.63 - 20.42 )	9.72 ( 54.65 )	8.98-10.46	9.7 ( 5.22 )	3.28 ( 1.61 )
ACTINIC KERATOSIS	7	SKIN AND SUBCUTANEOUS TISSUE DISORDERS	15.36 ( 7.31 - 32.27 )	15.35 ( 93.65 )	14.61-16.09	15.31 ( 8.23 )	3.94 ( 2.27 )
MYCOBACTERIUM AVIUM COMPLEX INFECTION	7	INFECTIONS AND INFESTATIONS	18.1 ( 8.61 - 38.02 )	18.08 ( 112.59 )	17.34-18.83	18.02 ( 9.68 )	4.17 ( 2.5 )
HEPATIC CYTOLYSIS	7	HEPATOBILIARY DISORDERS	4.03 ( 1.92 - 8.46 )	4.03 ( 15.93 )	3.29-4.77	4.03 ( 2.17 )	2.01 ( 0.34 )
COVID-19 PNEUMONIA	7	INFECTIONS AND INFESTATIONS	3.7 ( 1.76 - 7.76 )	3.7 ( 13.76 )	2.96-4.44	3.69 ( 1.99 )	1.89 ( 0.22 )
DISSEMINATED MYCOBACTERIUM AVIUM COMPLEX INFECTION	7	INFECTIONS AND INFESTATIONS	296.01 ( 138.18 - 634.13 )	295.81 ( 1945.94 )	295.05-296.57	279.93 ( 147.98 )	8.13 ( 6.44 )
RESPIRATORY DISTRESS	6	RESPIRATORY, THORACIC AND MEDIASTINAL DISORDERS	1.31 ( 0.59 - 2.92 )	1.31 ( 0.45 )	0.51-2.11	1.31 ( 0.67 )	0.39 ( -1.27 )
TRANSPLANT FAILURE	6	INJURY, POISONING AND PROCEDURAL COMPLICATIONS	15.34 ( 6.88 - 34.2 )	15.33 ( 80.15 )	14.53-16.13	15.29 ( 7.82 )	3.93 ( 2.27 )
PULMONARY EMBOLISM	6	RESPIRATORY, THORACIC AND MEDIASTINAL DISORDERS	0.37 ( 0.17 - 0.82 )	0.37 ( 6.47 )	-0.43-1.17	0.37 ( 0.19 )	-1.44 ( -3.1 )
PERIPHERAL SWELLING	6	GENERAL DISORDERS AND ADMINISTRATION SITE CONDITIONS	0.25 ( 0.11 - 0.55 )	0.25 ( 13.9 )	-0.55-1.05	0.25 ( 0.13 )	-2.02 ( -3.69 )
THERAPY CESSATION	6	SURGICAL AND MEDICAL PROCEDURES	0.75 ( 0.34 - 1.67 )	0.75 ( 0.49 )	-0.05-1.55	0.75 ( 0.38 )	-0.41 ( -2.08 )
THERAPEUTIC RESPONSE DECREASED	6	GENERAL DISORDERS AND ADMINISTRATION SITE CONDITIONS	0.64 ( 0.29 - 1.42 )	0.64 ( 1.23 )	-0.16-1.44	0.64 ( 0.33 )	-0.65 ( -2.31 )
PRODUCT QUALITY ISSUE	6	PRODUCT ISSUES	0.25 ( 0.11 - 0.56 )	0.25 ( 13.21 )	-0.55-1.05	0.25 ( 0.13 )	-1.98 ( -3.65 )
FLUID RETENTION	6	METABOLISM AND NUTRITION DISORDERS	0.71 ( 0.32 - 1.58 )	0.71 ( 0.72 )	-0.09-1.51	0.71 ( 0.36 )	-0.5 ( -2.16 )
C-REACTIVE PROTEIN INCREASED	6	INVESTIGATIONS	1.03 ( 0.46 - 2.3 )	1.03 ( 0.01 )	0.23-1.83	1.03 ( 0.53 )	0.04 ( -1.62 )
TREATMENT NONCOMPLIANCE	6	GENERAL DISORDERS AND ADMINISTRATION SITE CONDITIONS	0.73 ( 0.33 - 1.63 )	0.73 ( 0.58 )	-0.07-1.53	0.73 ( 0.38 )	-0.45 ( -2.11 )
CELLULITIS	6	INFECTIONS AND INFESTATIONS	0.7 ( 0.32 - 1.57 )	0.7 ( 0.75 )	-0.1-1.5	0.7 ( 0.36 )	-0.51 ( -2.17 )
LOSS OF CONSCIOUSNESS	6	NERVOUS SYSTEM DISORDERS	0.28 ( 0.13 - 0.63 )	0.28 ( 10.95 )	-0.52-1.08	0.28 ( 0.14 )	-1.82 ( -3.49 )
KIDNEY INFECTION	6	INFECTIONS AND INFESTATIONS	1.87 ( 0.84 - 4.17 )	1.87 ( 2.44 )	1.07-2.67	1.87 ( 0.96 )	0.9 ( -0.76 )
PULMONARY FUNCTION TEST DECREASED	6	INVESTIGATIONS	8.13 ( 3.65 - 18.1 )	8.12 ( 37.41 )	7.32-8.92	8.11 ( 4.15 )	3.02 ( 1.35 )
FEELING ABNORMAL	6	GENERAL DISORDERS AND ADMINISTRATION SITE CONDITIONS	0.15 ( 0.07 - 0.32 )	0.15 ( 30.13 )	-0.65-0.95	0.15 ( 0.07 )	-2.78 ( -4.44 )
RESTLESS LEGS SYNDROME	6	NERVOUS SYSTEM DISORDERS	1.96 ( 0.88 - 4.37 )	1.96 ( 2.84 )	1.16-2.76	1.96 ( 1 )	0.97 ( -0.69 )
HYPERLIPIDAEMIA	6	METABOLISM AND NUTRITION DISORDERS	2.87 ( 1.29 - 6.4 )	2.87 ( 7.32 )	2.07-3.67	2.87 ( 1.47 )	1.52 ( -0.15 )
DELAYED GRAFT FUNCTION	6	INJURY, POISONING AND PROCEDURAL COMPLICATIONS	54.55 ( 24.4 - 121.97 )	54.52 ( 311.97 )	53.72-55.33	53.97 ( 27.53 )	5.75 ( 4.08 )
HYPOPHOSPHATAEMIA	6	METABOLISM AND NUTRITION DISORDERS	5.11 ( 2.29 - 11.39 )	5.11 ( 19.81 )	4.31-5.91	5.11 ( 2.61 )	2.35 ( 0.69 )
LARGE INTESTINAL ULCER	6	GASTROINTESTINAL DISORDERS	13.72 ( 6.15 - 30.57 )	13.71 ( 70.51 )	12.91-14.51	13.67 ( 6.99 )	3.77 ( 2.11 )
HERPES ZOSTER	6	INFECTIONS AND INFESTATIONS	0.63 ( 0.28 - 1.4 )	0.63 ( 1.3 )	-0.17-1.43	0.63 ( 0.32 )	-0.66 ( -2.33 )
ORAL CANDIDIASIS	6	INFECTIONS AND INFESTATIONS	2.96 ( 1.33 - 6.59 )	2.96 ( 7.78 )	2.16-3.76	2.96 ( 1.51 )	1.56 ( -0.1 )
ABDOMINAL PAIN UPPER	6	GASTROINTESTINAL DISORDERS	0.18 ( 0.08 - 0.4 )	0.18 ( 22.24 )	-0.62-0.98	0.18 ( 0.09 )	-2.46 ( -4.13 )
HYPOKALAEMIA	6	METABOLISM AND NUTRITION DISORDERS	0.81 ( 0.36 - 1.8 )	0.81 ( 0.27 )	0.01-1.61	0.81 ( 0.41 )	-0.31 ( -1.97 )
UROSEPSIS	6	INFECTIONS AND INFESTATIONS	3.99 ( 1.79 - 8.89 )	3.99 ( 13.42 )	3.19-4.79	3.99 ( 2.04 )	1.99 ( 0.33 )
STATUS EPILEPTICUS	6	NERVOUS SYSTEM DISORDERS	3.31 ( 1.49 - 7.37 )	3.31 ( 9.66 )	2.51-4.11	3.31 ( 1.69 )	1.73 ( 0.06 )
AORTIC ARTERIOSCLEROSIS	6	VASCULAR DISORDERS	10.43 ( 4.68 - 23.24 )	10.42 ( 51.02 )	9.62-11.22	10.4 ( 5.32 )	3.38 ( 1.71 )
COMPLICATIONS OF TRANSPLANTED KIDNEY	6	INJURY, POISONING AND PROCEDURAL COMPLICATIONS	16.11 ( 7.23 - 35.91 )	16.1 ( 84.72 )	15.3-16.9	16.05 ( 8.21 )	4 ( 2.34 )
BACTERIAL SEPSIS	6	INFECTIONS AND INFESTATIONS	11.48 ( 5.15 - 25.59 )	11.48 ( 57.27 )	10.68-12.28	11.46 ( 5.86 )	3.52 ( 1.85 )
HAEMORRHOIDS	6	GASTROINTESTINAL DISORDERS	1.84 ( 0.83 - 4.11 )	1.84 ( 2.31 )	1.04-2.64	1.84 ( 0.94 )	0.88 ( -0.78 )
LOWER RESPIRATORY TRACT INFECTION	6	INFECTIONS AND INFESTATIONS	0.89 ( 0.4 - 1.99 )	0.89 ( 0.08 )	0.09-1.69	0.89 ( 0.46 )	-0.16 ( -1.83 )
RENAL TUBULAR DISORDER	6	RENAL AND URINARY DISORDERS	12.35 ( 5.54 - 27.53 )	12.35 ( 62.42 )	11.55-13.15	12.32 ( 6.3 )	3.62 ( 1.96 )
NASOPHARYNGITIS	6	INFECTIONS AND INFESTATIONS	0.2 ( 0.09 - 0.45 )	0.2 ( 18.6 )	-0.6-1	0.2 ( 0.1 )	-2.29 ( -3.95 )
CHRONIC GRAFT VERSUS HOST DISEASE	6	IMMUNE SYSTEM DISORDERS	10.72 ( 4.81 - 23.89 )	10.72 ( 52.76 )	9.92-11.52	10.7 ( 5.47 )	3.42 ( 1.75 )
DRUG INTOLERANCE	6	GENERAL DISORDERS AND ADMINISTRATION SITE CONDITIONS	0.39 ( 0.18 - 0.88 )	0.4 ( 5.56 )	-0.4-1.2	0.4 ( 0.2 )	-1.34 ( -3.01 )
PETECHIAE	6	SKIN AND SUBCUTANEOUS TISSUE DISORDERS	3.46 ( 1.56 - 7.72 )	3.46 ( 10.51 )	2.66-4.26	3.46 ( 1.77 )	1.79 ( 0.13 )
PLATELET COUNT ABNORMAL	6	INVESTIGATIONS	6.3 ( 2.83 - 14.04 )	6.3 ( 26.72 )	5.5-7.1	6.29 ( 3.22 )	2.65 ( 0.99 )
POLYNEUROPATHY	6	NERVOUS SYSTEM DISORDERS	3.23 ( 1.45 - 7.19 )	3.23 ( 9.23 )	2.43-4.03	3.23 ( 1.65 )	1.69 ( 0.02 )
EOSINOPHILIA	5	BLOOD AND LYMPHATIC SYSTEM DISORDERS	1.81 ( 0.75 - 4.35 )	1.81 ( 1.81 )	0.93-2.68	1.81 ( 0.87 )	0.85 ( -0.81 )
IMMUNODEFICIENCY	5	IMMUNE SYSTEM DISORDERS	2.36 ( 0.98 - 5.67 )	2.36 ( 3.91 )	1.48-3.23	2.36 ( 1.13 )	1.24 ( -0.43 )
GLOMERULAR FILTRATION RATE DECREASED	5	INVESTIGATIONS	2.82 ( 1.17 - 6.77 )	2.82 ( 5.86 )	1.94-3.69	2.82 ( 1.35 )	1.49 ( -0.17 )
GENERALISED TONIC-CLONIC SEIZURE	5	NERVOUS SYSTEM DISORDERS	1.17 ( 0.49 - 2.8 )	1.17 ( 0.12 )	0.29-2.04	1.17 ( 0.56 )	0.22 ( -1.44 )
PANCREATITIS ACUTE	5	GASTROINTESTINAL DISORDERS	1.41 ( 0.59 - 3.39 )	1.41 ( 0.6 )	0.53-2.29	1.41 ( 0.68 )	0.5 ( -1.17 )
DYSPHONIA	5	RESPIRATORY, THORACIC AND MEDIASTINAL DISORDERS	0.52 ( 0.22 - 1.25 )	0.52 ( 2.19 )	-0.35-1.4	0.52 ( 0.25 )	-0.94 ( -2.6 )
COMPLICATIONS OF TRANSPLANTED LUNG	5	INJURY, POISONING AND PROCEDURAL COMPLICATIONS	118.19 ( 48.7 - 286.85 )	118.13 ( 567.8 )	117.25-119.02	115.53 ( 55.02 )	6.85 ( 5.17 )
ASPARTATE AMINOTRANSFERASE INCREASED	5	INVESTIGATIONS	0.56 ( 0.23 - 1.34 )	0.56 ( 1.76 )	-0.32-1.43	0.56 ( 0.27 )	-0.84 ( -2.51 )
ASPIRATION	5	RESPIRATORY, THORACIC AND MEDIASTINAL DISORDERS	2.9 ( 1.21 - 6.98 )	2.9 ( 6.23 )	2.03-3.78	2.9 ( 1.39 )	1.54 ( -0.13 )
ACUTE GRAFT VERSUS HOST DISEASE IN SKIN	5	IMMUNE SYSTEM DISORDERS	12.02 ( 4.99 - 28.9 )	12.01 ( 50.35 )	11.13-12.89	11.98 ( 5.75 )	3.58 ( 1.92 )
EPSTEIN-BARR VIRAEMIA	5	INFECTIONS AND INFESTATIONS	33.29 ( 13.82 - 80.23 )	33.28 ( 155.54 )	32.4-34.16	33.07 ( 15.84 )	5.05 ( 3.38 )
BLOOD GLUCOSE INCREASED	5	INVESTIGATIONS	0.16 ( 0.06 - 0.37 )	0.16 ( 22.84 )	-0.72-1.03	0.16 ( 0.08 )	-2.68 ( -4.34 )
NERVOUS SYSTEM DISORDER	5	NERVOUS SYSTEM DISORDERS	0.93 ( 0.39 - 2.22 )	0.93 ( 0.03 )	0.05-1.8	0.93 ( 0.44 )	-0.11 ( -1.78 )
WRONG TECHNIQUE IN PRODUCT USAGE PROCESS	5	INJURY, POISONING AND PROCEDURAL COMPLICATIONS	0.13 ( 0.05 - 0.32 )	0.13 ( 28.57 )	-0.74-1.01	0.13 ( 0.06 )	-2.92 ( -4.58 )
RENAL TRANSPLANT FAILURE	5	INJURY, POISONING AND PROCEDURAL COMPLICATIONS	30.73 ( 12.76 - 74.05 )	30.72 ( 142.92 )	29.84-31.6	30.55 ( 14.64 )	4.93 ( 3.26 )
HYPOTHYROIDISM	5	ENDOCRINE DISORDERS	0.99 ( 0.41 - 2.38 )	0.99 ( 0 )	0.12-1.87	0.99 ( 0.48 )	-0.01 ( -1.68 )
SINUSITIS	5	INFECTIONS AND INFESTATIONS	0.3 ( 0.12 - 0.71 )	0.3 ( 8.35 )	-0.58-1.17	0.3 ( 0.14 )	-1.75 ( -3.42 )
WHITE BLOOD CELL COUNT INCREASED	5	INVESTIGATIONS	0.76 ( 0.32 - 1.84 )	0.76 ( 0.36 )	-0.11-1.64	0.76 ( 0.37 )	-0.39 ( -2.05 )
RASH PRURITIC	5	SKIN AND SUBCUTANEOUS TISSUE DISORDERS	0.59 ( 0.25 - 1.42 )	0.59 ( 1.41 )	-0.29-1.47	0.59 ( 0.28 )	-0.76 ( -2.42 )
HAEMORRHAGE	5	VASCULAR DISORDERS	0.3 ( 0.12 - 0.71 )	0.3 ( 8.42 )	-0.58-1.17	0.3 ( 0.14 )	-1.76 ( -3.43 )
RESTLESSNESS	5	PSYCHIATRIC DISORDERS	0.82 ( 0.34 - 1.96 )	0.82 ( 0.21 )	-0.06-1.69	0.82 ( 0.39 )	-0.29 ( -1.96 )
FLANK PAIN	5	MUSCULOSKELETAL AND CONNECTIVE TISSUE DISORDERS	3.23 ( 1.34 - 7.76 )	3.23 ( 7.68 )	2.35-4.1	3.23 ( 1.55 )	1.69 ( 0.02 )
VIRAEMIA	5	INFECTIONS AND INFESTATIONS	24.83 ( 10.31 - 59.8 )	24.82 ( 113.77 )	23.94-25.7	24.71 ( 11.84 )	4.63 ( 2.96 )
LIVER FUNCTION TEST ABNORMAL	5	INVESTIGATIONS	0.97 ( 0.41 - 2.34 )	0.97 ( 0 )	0.1-1.85	0.97 ( 0.47 )	-0.04 ( -1.7 )
MEAN CELL VOLUME INCREASED	5	INVESTIGATIONS	12.51 ( 5.2 - 30.09 )	12.5 ( 52.78 )	11.62-13.38	12.47 ( 5.98 )	3.64 ( 1.97 )
TRANSFUSION	5	SURGICAL AND MEDICAL PROCEDURES	2.8 ( 1.16 - 6.73 )	2.8 ( 5.78 )	1.92-3.68	2.8 ( 1.34 )	1.48 ( -0.18 )
LUNG DISORDER	5	RESPIRATORY, THORACIC AND MEDIASTINAL DISORDERS	0.65 ( 0.27 - 1.55 )	0.65 ( 0.97 )	-0.23-1.52	0.65 ( 0.31 )	-0.63 ( -2.3 )
CYTOMEGALOVIRUS GASTROENTERITIS	5	INFECTIONS AND INFESTATIONS	166.68 ( 68.4 - 406.16 )	166.6 ( 797.45 )	165.71-167.49	161.45 ( 76.63 )	7.33 ( 5.65 )
HYPERPARATHYROIDISM	5	ENDOCRINE DISORDERS	14.35 ( 5.96 - 34.52 )	14.34 ( 61.89 )	13.47-15.22	14.31 ( 6.86 )	3.84 ( 2.17 )
LEUKAEMIA	5	NEOPLASMS BENIGN, MALIGNANT AND UNSPECIFIED (INCL CYSTS AND POLYPS)	3.24 ( 1.35 - 7.79 )	3.24 ( 7.74 )	2.36-4.12	3.24 ( 1.55 )	1.7 ( 0.03 )
GRAFT VERSUS HOST DISEASE IN SKIN	5	IMMUNE SYSTEM DISORDERS	14.63 ( 6.08 - 35.21 )	14.63 ( 63.29 )	13.75-15.5	14.59 ( 7 )	3.87 ( 2.2 )
NEPHROTIC SYNDROME	5	RENAL AND URINARY DISORDERS	4.55 ( 1.89 - 10.95 )	4.55 ( 13.85 )	3.67-5.43	4.55 ( 2.18 )	2.19 ( 0.52 )
CRYPTOSPORIDIOSIS INFECTION	5	INFECTIONS AND INFESTATIONS	65.66 ( 27.17 - 158.66 )	65.63 ( 314.25 )	64.75-66.51	64.82 ( 30.98 )	6.02 ( 4.35 )
NEUTROPHIL PELGER-HUET ANOMALY PRESENT	5	INVESTIGATIONS	154.77 ( 63.58 - 376.78 )	154.7 ( 741.45 )	153.81-155.58	150.25 ( 71.37 )	7.23 ( 5.55 )
MENINGITIS VIRAL	5	INFECTIONS AND INFESTATIONS	21.58 ( 8.96 - 51.95 )	21.57 ( 97.67 )	20.69-22.45	21.48 ( 10.3 )	4.43 ( 2.76 )
HERNIA	5	GENERAL DISORDERS AND ADMINISTRATION SITE CONDITIONS	1.63 ( 0.68 - 3.93 )	1.63 ( 1.23 )	0.76-2.51	1.63 ( 0.78 )	0.71 ( -0.96 )
CELL-MEDIATED CYTOTOXICITY	5	METABOLISM AND NUTRITION DISORDERS	702.75 ( 276.14 - 1788.44 )	702.4 ( 3085.11 )	701.47-703.34	618.9 ( 283.26 )	9.27 ( 7.55 )
DIVERTICULUM	5	GASTROINTESTINAL DISORDERS	3.73 ( 1.55 - 8.97 )	3.73 ( 9.98 )	2.85-4.61	3.73 ( 1.79 )	1.9 ( 0.23 )
SKIN REACTION	5	SKIN AND SUBCUTANEOUS TISSUE DISORDERS	2.23 ( 0.93 - 5.37 )	2.23 ( 3.4 )	1.36-3.11	2.23 ( 1.07 )	1.16 ( -0.51 )
LARGE INTESTINE POLYP	5	GASTROINTESTINAL DISORDERS	3.34 ( 1.39 - 8.02 )	3.34 ( 8.18 )	2.46-4.21	3.34 ( 1.6 )	1.74 ( 0.07 )
APLASTIC ANAEMIA	5	BLOOD AND LYMPHATIC SYSTEM DISORDERS	5.92 ( 2.46 - 14.24 )	5.92 ( 20.42 )	5.04-6.8	5.91 ( 2.84 )	2.56 ( 0.9 )
HIP FRACTURE	5	INJURY, POISONING AND PROCEDURAL COMPLICATIONS	0.96 ( 0.4 - 2.32 )	0.96 ( 0.01 )	0.09-1.84	0.96 ( 0.46 )	-0.05 ( -1.72 )
CYTOMEGALOVIRUS ENTEROCOLITIS	5	INFECTIONS AND INFESTATIONS	45.38 ( 18.81 - 109.46 )	45.36 ( 215.02 )	44.48-46.24	44.97 ( 21.53 )	5.49 ( 3.82 )
INFUSION SITE ERYTHEMA	5	GENERAL DISORDERS AND ADMINISTRATION SITE CONDITIONS	4.29 ( 1.79 - 10.32 )	4.29 ( 12.61 )	3.41-5.17	4.29 ( 2.06 )	2.1 ( 0.43 )
INFUSION SITE SWELLING	5	GENERAL DISORDERS AND ADMINISTRATION SITE CONDITIONS	5.69 ( 2.36 - 13.67 )	5.68 ( 19.28 )	4.81-6.56	5.68 ( 2.73 )	2.51 ( 0.84 )
KAPOSI'S SARCOMA	5	NEOPLASMS BENIGN, MALIGNANT AND UNSPECIFIED (INCL CYSTS AND POLYPS)	10.02 ( 4.17 - 24.11 )	10.02 ( 40.52 )	9.14-10.9	10 ( 4.8 )	3.32 ( 1.66 )
PROCTITIS	5	GASTROINTESTINAL DISORDERS	11.27 ( 4.68 - 27.1 )	11.26 ( 46.65 )	10.38-12.14	11.24 ( 5.39 )	3.49 ( 1.82 )
PULMONARY HYPERTENSION	5	RESPIRATORY, THORACIC AND MEDIASTINAL DISORDERS	1.41 ( 0.59 - 3.4 )	1.41 ( 0.61 )	0.54-2.29	1.41 ( 0.68 )	0.5 ( -1.17 )
BASAL CELL CARCINOMA	5	NEOPLASMS BENIGN, MALIGNANT AND UNSPECIFIED (INCL CYSTS AND POLYPS)	1.96 ( 0.82 - 4.71 )	1.96 ( 2.35 )	1.08-2.84	1.96 ( 0.94 )	0.97 ( -0.7 )
CAROTID ARTERIOSCLEROSIS	5	NERVOUS SYSTEM DISORDERS	27.34 ( 11.35 - 65.85 )	27.33 ( 126.16 )	26.45-28.21	27.19 ( 13.03 )	4.77 ( 3.1 )
FEAR	5	PSYCHIATRIC DISORDERS	1.04 ( 0.43 - 2.51 )	1.04 ( 0.01 )	0.17-1.92	1.04 ( 0.5 )	0.06 ( -1.6 )
LEFT VENTRICULAR HYPERTROPHY	5	CARDIAC DISORDERS	6.89 ( 2.87 - 16.57 )	6.89 ( 25.13 )	6.01-7.76	6.88 ( 3.3 )	2.78 ( 1.12 )
HEPATOSPLENOMEGALY	5	HEPATOBILIARY DISORDERS	11.41 ( 4.75 - 27.45 )	11.41 ( 47.38 )	10.53-12.29	11.39 ( 5.46 )	3.51 ( 1.84 )
DIVERTICULUM INTESTINAL	5	GASTROINTESTINAL DISORDERS	7.42 ( 3.08 - 17.84 )	7.41 ( 27.71 )	6.54-8.29	7.41 ( 3.55 )	2.89 ( 1.22 )
SPINAL STENOSIS	5	MUSCULOSKELETAL AND CONNECTIVE TISSUE DISORDERS	3.37 ( 1.4 - 8.1 )	3.37 ( 8.33 )	2.49-4.25	3.37 ( 1.62 )	1.75 ( 0.09 )
RENAL CYST HAEMORRHAGE	5	RENAL AND URINARY DISORDERS	133.34 ( 54.87 - 324.03 )	133.28 ( 640.01 )	132.39-134.16	129.97 ( 61.83 )	7.02 ( 5.34 )
SPINAL OSTEOARTHRITIS	5	MUSCULOSKELETAL AND CONNECTIVE TISSUE DISORDERS	3.3 ( 1.37 - 7.94 )	3.3 ( 8.01 )	2.42-4.18	3.3 ( 1.58 )	1.72 ( 0.06 )
HEPATIC STEATOSIS	5	HEPATOBILIARY DISORDERS	1.65 ( 0.69 - 3.96 )	1.65 ( 1.28 )	0.77-2.53	1.65 ( 0.79 )	0.72 ( -0.95 )
BENIGN PROSTATIC HYPERPLASIA	5	REPRODUCTIVE SYSTEM AND BREAST DISORDERS	5.64 ( 2.35 - 13.56 )	5.64 ( 19.06 )	4.76-6.51	5.63 ( 2.7 )	2.49 ( 0.83 )
DISSEMINATED VARICELLA ZOSTER VIRUS INFECTION	5	INFECTIONS AND INFESTATIONS	125.01 ( 51.48 - 303.57 )	124.95 ( 600.34 )	124.06-125.83	122.04 ( 58.09 )	6.93 ( 5.25 )
COLORECTAL ADENOCARCINOMA	5	NEOPLASMS BENIGN, MALIGNANT AND UNSPECIFIED (INCL CYSTS AND POLYPS)	161.5 ( 66.3 - 393.38 )	161.42 ( 773.13 )	160.53-162.31	156.59 ( 74.35 )	7.29 ( 5.61 )
ACIDOSIS	4	METABOLISM AND NUTRITION DISORDERS	3.14 ( 1.18 - 8.36 )	3.13 ( 5.81 )	2.15-4.11	3.13 ( 1.38 )	1.65 ( -0.02 )
CARDIAC FAILURE CONGESTIVE	4	CARDIAC DISORDERS	0.27 ( 0.1 - 0.73 )	0.27 ( 7.68 )	-0.71-1.25	0.27 ( 0.12 )	-1.86 ( -3.53 )
DRUG REACTION WITH EOSINOPHILIA AND SYSTEMIC SYMPTOMS	4	SKIN AND SUBCUTANEOUS TISSUE DISORDERS	0.89 ( 0.33 - 2.36 )	0.89 ( 0.06 )	-0.09-1.87	0.89 ( 0.39 )	-0.17 ( -1.84 )
ACUTE MYELOID LEUKAEMIA	4	NEOPLASMS BENIGN, MALIGNANT AND UNSPECIFIED (INCL CYSTS AND POLYPS)	1.61 ( 0.6 - 4.28 )	1.61 ( 0.91 )	0.63-2.59	1.6 ( 0.71 )	0.68 ( -0.98 )
GASTRITIS	4	GASTROINTESTINAL DISORDERS	0.9 ( 0.34 - 2.4 )	0.9 ( 0.04 )	-0.08-1.88	0.9 ( 0.4 )	-0.15 ( -1.81 )
SOMNOLENCE	4	NERVOUS SYSTEM DISORDERS	0.12 ( 0.05 - 0.32 )	0.12 ( 25.58 )	-0.86-1.1	0.12 ( 0.05 )	-3.04 ( -4.71 )
DEPRESSION	4	PSYCHIATRIC DISORDERS	0.1 ( 0.04 - 0.27 )	0.1 ( 31.54 )	-0.88-1.08	0.1 ( 0.05 )	-3.29 ( -4.95 )
PSYCHOTIC DISORDER	4	PSYCHIATRIC DISORDERS	0.82 ( 0.31 - 2.18 )	0.82 ( 0.16 )	-0.16-1.8	0.82 ( 0.36 )	-0.29 ( -1.96 )
SCHIZOPHRENIA	4	PSYCHIATRIC DISORDERS	1.99 ( 0.75 - 5.31 )	1.99 ( 1.97 )	1.01-2.97	1.99 ( 0.88 )	0.99 ( -0.67 )
TRANSAMINASES INCREASED	4	INVESTIGATIONS	1.09 ( 0.41 - 2.91 )	1.09 ( 0.03 )	0.11-2.07	1.09 ( 0.48 )	0.12 ( -1.54 )
CARDIAC DISORDER	4	CARDIAC DISORDERS	0.25 ( 0.1 - 0.68 )	0.25 ( 8.8 )	-0.73-1.23	0.25 ( 0.11 )	-1.98 ( -3.64 )
PULMONARY MASS	4	RESPIRATORY, THORACIC AND MEDIASTINAL DISORDERS	1.69 ( 0.63 - 4.49 )	1.69 ( 1.12 )	0.71-2.67	1.69 ( 0.74 )	0.75 ( -0.91 )
PULMONARY FIBROSIS	4	RESPIRATORY, THORACIC AND MEDIASTINAL DISORDERS	1.37 ( 0.51 - 3.65 )	1.37 ( 0.4 )	0.39-2.35	1.37 ( 0.6 )	0.45 ( -1.21 )
APHTHOUS ULCER	4	GASTROINTESTINAL DISORDERS	2.48 ( 0.93 - 6.61 )	2.48 ( 3.53 )	1.5-3.46	2.48 ( 1.09 )	1.31 ( -0.36 )
PRODUCT ADMINISTRATION ERROR	4	INJURY, POISONING AND PROCEDURAL COMPLICATIONS	0.46 ( 0.17 - 1.24 )	0.46 ( 2.48 )	-0.52-1.44	0.46 ( 0.2 )	-1.11 ( -2.77 )
PREGNANCY	4	PREGNANCY, PUERPERIUM AND PERINATAL CONDITIONS	1.12 ( 0.42 - 2.99 )	1.12 ( 0.05 )	0.14-2.1	1.12 ( 0.49 )	0.16 ( -1.5 )
EPSTEIN-BARR VIRUS TEST POSITIVE	4	INVESTIGATIONS	39.54 ( 14.78 - 105.77 )	39.53 ( 149.08 )	38.54-40.51	39.24 ( 17.22 )	5.29 ( 3.62 )
TYPE 2 DIABETES MELLITUS	4	METABOLISM AND NUTRITION DISORDERS	0.7 ( 0.26 - 1.86 )	0.7 ( 0.52 )	-0.28-1.68	0.7 ( 0.31 )	-0.52 ( -2.18 )
HYPOGLYCAEMIA	4	METABOLISM AND NUTRITION DISORDERS	0.49 ( 0.18 - 1.31 )	0.49 ( 2.1 )	-0.49-1.47	0.49 ( 0.22 )	-1.02 ( -2.69 )
ORAL HERPES	4	INFECTIONS AND INFESTATIONS	1.31 ( 0.49 - 3.48 )	1.31 ( 0.29 )	0.33-2.29	1.31 ( 0.57 )	0.38 ( -1.28 )
OESOPHAGITIS	4	GASTROINTESTINAL DISORDERS	2.25 ( 0.85 - 6.01 )	2.25 ( 2.79 )	1.27-3.23	2.25 ( 0.99 )	1.17 ( -0.5 )
HYPOXIA	4	RESPIRATORY, THORACIC AND MEDIASTINAL DISORDERS	0.71 ( 0.27 - 1.9 )	0.71 ( 0.46 )	-0.27-1.69	0.71 ( 0.31 )	-0.49 ( -2.16 )
GRANULOCYTOPENIA	4	BLOOD AND LYMPHATIC SYSTEM DISORDERS	3.92 ( 1.47 - 10.46 )	3.92 ( 8.71 )	2.94-4.9	3.92 ( 1.73 )	1.97 ( 0.3 )
SKIN LACERATION	4	INJURY, POISONING AND PROCEDURAL COMPLICATIONS	1.16 ( 0.43 - 3.09 )	1.16 ( 0.09 )	0.18-2.14	1.16 ( 0.51 )	0.21 ( -1.45 )
NEPHROLITHIASIS	4	RENAL AND URINARY DISORDERS	0.55 ( 0.21 - 1.47 )	0.55 ( 1.47 )	-0.43-1.53	0.55 ( 0.24 )	-0.86 ( -2.53 )
ACCIDENTAL EXPOSURE TO PRODUCT	4	INJURY, POISONING AND PROCEDURAL COMPLICATIONS	0.3 ( 0.11 - 0.79 )	0.3 ( 6.65 )	-0.68-1.28	0.3 ( 0.13 )	-1.75 ( -3.42 )
BONE PAIN	4	MUSCULOSKELETAL AND CONNECTIVE TISSUE DISORDERS	0.41 ( 0.15 - 1.1 )	0.41 ( 3.37 )	-0.57-1.39	0.41 ( 0.18 )	-1.28 ( -2.95 )
EXPIRED PRODUCT ADMINISTERED	4	INJURY, POISONING AND PROCEDURAL COMPLICATIONS	0.63 ( 0.24 - 1.68 )	0.63 ( 0.87 )	-0.35-1.61	0.63 ( 0.28 )	-0.67 ( -2.33 )
EXPOSURE DURING PREGNANCY	4	INJURY, POISONING AND PROCEDURAL COMPLICATIONS	0.25 ( 0.09 - 0.65 )	0.25 ( 9.26 )	-0.73-1.23	0.25 ( 0.11 )	-2.02 ( -3.69 )
RASH MACULO-PAPULAR	4	SKIN AND SUBCUTANEOUS TISSUE DISORDERS	1.14 ( 0.43 - 3.05 )	1.14 ( 0.07 )	0.16-2.12	1.14 ( 0.5 )	0.19 ( -1.47 )
UNEVALUABLE EVENT	4	GENERAL DISORDERS AND ADMINISTRATION SITE CONDITIONS	0.31 ( 0.12 - 0.82 )	0.31 ( 6.24 )	-0.67-1.29	0.31 ( 0.14 )	-1.7 ( -3.37 )
BLOOD ALKALINE PHOSPHATASE INCREASED	4	INVESTIGATIONS	0.92 ( 0.35 - 2.46 )	0.92 ( 0.03 )	-0.06-1.9	0.92 ( 0.41 )	-0.11 ( -1.78 )
LIVER FUNCTION TEST INCREASED	4	INVESTIGATIONS	1.3 ( 0.49 - 3.48 )	1.3 ( 0.28 )	0.32-2.28	1.3 ( 0.57 )	0.38 ( -1.28 )
DIVERTICULITIS	4	INFECTIONS AND INFESTATIONS	0.89 ( 0.33 - 2.37 )	0.89 ( 0.05 )	-0.09-1.87	0.89 ( 0.39 )	-0.17 ( -1.83 )
IMMUNE SYSTEM DISORDER	4	IMMUNE SYSTEM DISORDERS	1.89 ( 0.71 - 5.02 )	1.88 ( 1.66 )	0.9-2.86	1.88 ( 0.83 )	0.91 ( -0.75 )
MALNUTRITION	4	METABOLISM AND NUTRITION DISORDERS	2.28 ( 0.85 - 6.07 )	2.28 ( 2.86 )	1.3-3.26	2.28 ( 1 )	1.19 ( -0.48 )
WHITE BLOOD CELL COUNT ABNORMAL	4	INVESTIGATIONS	3.9 ( 1.46 - 10.38 )	3.89 ( 8.6 )	2.91-4.87	3.89 ( 1.71 )	1.96 ( 0.29 )
LIVER INJURY	4	HEPATOBILIARY DISORDERS	1.24 ( 0.47 - 3.31 )	1.24 ( 0.19 )	0.26-2.22	1.24 ( 0.55 )	0.31 ( -1.35 )
OROPHARYNGEAL PAIN	4	RESPIRATORY, THORACIC AND MEDIASTINAL DISORDERS	0.26 ( 0.1 - 0.71 )	0.26 ( 8.17 )	-0.71-1.24	0.26 ( 0.12 )	-1.92 ( -3.58 )
CLOSTRIDIUM DIFFICILE INFECTION	4	INFECTIONS AND INFESTATIONS	1.18 ( 0.44 - 3.15 )	1.18 ( 0.11 )	0.2-2.16	1.18 ( 0.52 )	0.24 ( -1.42 )
RETINITIS	4	INFECTIONS AND INFESTATIONS	27.84 ( 10.42 - 74.4 )	27.83 ( 102.93 )	26.85-28.82	27.69 ( 12.17 )	4.79 ( 3.12 )
HAEMATEMESIS	4	GASTROINTESTINAL DISORDERS	0.94 ( 0.35 - 2.5 )	0.94 ( 0.02 )	-0.04-1.92	0.94 ( 0.41 )	-0.09 ( -1.76 )
PNEUMONIA ASPIRATION	4	INFECTIONS AND INFESTATIONS	0.99 ( 0.37 - 2.64 )	0.99 ( 0 )	0.01-1.97	0.99 ( 0.44 )	-0.02 ( -1.68 )
URINARY RETENTION	4	RENAL AND URINARY DISORDERS	0.74 ( 0.28 - 1.96 )	0.74 ( 0.37 )	-0.24-1.72	0.74 ( 0.32 )	-0.44 ( -2.11 )
ESCHERICHIA URINARY TRACT INFECTION	4	INFECTIONS AND INFESTATIONS	5.62 ( 2.11 - 15 )	5.62 ( 15.19 )	4.64-6.6	5.62 ( 2.47 )	2.49 ( 0.82 )
HYDRONEPHROSIS	4	RENAL AND URINARY DISORDERS	3.24 ( 1.22 - 8.65 )	3.24 ( 6.2 )	2.26-4.22	3.24 ( 1.43 )	1.7 ( 0.03 )
APLASIA PURE RED CELL	4	BLOOD AND LYMPHATIC SYSTEM DISORDERS	7.21 ( 2.7 - 19.22 )	7.2 ( 21.34 )	6.22-8.18	7.2 ( 3.17 )	2.85 ( 1.18 )
SMALL INTESTINAL OBSTRUCTION	4	GASTROINTESTINAL DISORDERS	2.03 ( 0.76 - 5.4 )	2.03 ( 2.08 )	1.05-3.01	2.03 ( 0.89 )	1.02 ( -0.65 )
OBESITY	4	METABOLISM AND NUTRITION DISORDERS	1.62 ( 0.61 - 4.32 )	1.62 ( 0.95 )	0.64-2.6	1.62 ( 0.71 )	0.7 ( -0.97 )
CARDIAC DYSFUNCTION	4	CARDIAC DISORDERS	8.1 ( 3.04 - 21.61 )	8.1 ( 24.85 )	7.12-9.08	8.09 ( 3.56 )	3.02 ( 1.35 )
SPINAL FRACTURE	4	INJURY, POISONING AND PROCEDURAL COMPLICATIONS	1.27 ( 0.48 - 3.38 )	1.27 ( 0.23 )	0.29-2.25	1.27 ( 0.56 )	0.34 ( -1.32 )
ANGIOEDEMA	4	SKIN AND SUBCUTANEOUS TISSUE DISORDERS	0.52 ( 0.2 - 1.4 )	0.52 ( 1.72 )	-0.46-1.5	0.52 ( 0.23 )	-0.93 ( -2.6 )
PNEUMONIA NECROTISING	4	INFECTIONS AND INFESTATIONS	45.91 ( 17.15 - 122.89 )	45.9 ( 174.14 )	44.91-46.88	45.5 ( 19.97 )	5.51 ( 3.84 )
ACINETOBACTER INFECTION	4	INFECTIONS AND INFESTATIONS	23.42 ( 8.77 - 62.56 )	23.41 ( 85.44 )	22.43-24.4	23.31 ( 10.25 )	4.54 ( 2.87 )
CARDIAC FAILURE	4	CARDIAC DISORDERS	0.3 ( 0.11 - 0.81 )	0.3 ( 6.43 )	-0.68-1.28	0.3 ( 0.13 )	-1.72 ( -3.39 )
HERPES SIMPLEX	4	INFECTIONS AND INFESTATIONS	3.89 ( 1.46 - 10.36 )	3.89 ( 8.57 )	2.91-4.87	3.88 ( 1.71 )	1.96 ( 0.29 )
LYMPHOCELE	4	VASCULAR DISORDERS	33.28 ( 12.45 - 88.96 )	33.27 ( 124.39 )	32.28-34.25	33.06 ( 14.52 )	5.05 ( 3.38 )
CRYPTOCOCCOSIS	4	INFECTIONS AND INFESTATIONS	16.64 ( 6.23 - 44.41 )	16.63 ( 58.59 )	15.65-17.61	16.58 ( 7.29 )	4.05 ( 2.38 )
LARGE INTESTINE PERFORATION	4	GASTROINTESTINAL DISORDERS	3.51 ( 1.32 - 9.35 )	3.51 ( 7.16 )	2.53-4.49	3.5 ( 1.54 )	1.81 ( 0.14 )
WHITE BLOOD CELL DISORDER	4	BLOOD AND LYMPHATIC SYSTEM DISORDERS	9.01 ( 3.38 - 24.04 )	9.01 ( 28.43 )	8.03-9.99	8.99 ( 3.96 )	3.17 ( 1.5 )
PNEUMONIA BACTERIAL	4	INFECTIONS AND INFESTATIONS	2.95 ( 1.11 - 7.86 )	2.95 ( 5.14 )	1.97-3.93	2.95 ( 1.3 )	1.56 ( -0.11 )
PANCREATITIS	4	GASTROINTESTINAL DISORDERS	0.46 ( 0.17 - 1.23 )	0.46 ( 2.53 )	-0.52-1.44	0.46 ( 0.2 )	-1.12 ( -2.78 )
COMA	4	NERVOUS SYSTEM DISORDERS	0.51 ( 0.19 - 1.35 )	0.51 ( 1.92 )	-0.47-1.49	0.51 ( 0.22 )	-0.98 ( -2.65 )
UVEITIS	4	EYE DISORDERS	1.95 ( 0.73 - 5.2 )	1.95 ( 1.85 )	0.97-2.93	1.95 ( 0.86 )	0.96 ( -0.7 )
BRAIN OEDEMA	4	NERVOUS SYSTEM DISORDERS	1.93 ( 0.72 - 5.14 )	1.93 ( 1.78 )	0.95-2.91	1.93 ( 0.85 )	0.95 ( -0.72 )
MALABSORPTION	4	GASTROINTESTINAL DISORDERS	4.74 ( 1.78 - 12.63 )	4.74 ( 11.78 )	3.76-5.72	4.73 ( 2.08 )	2.24 ( 0.58 )
RENAL TUBULAR NECROSIS	4	RENAL AND URINARY DISORDERS	2.51 ( 0.94 - 6.69 )	2.51 ( 3.63 )	1.53-3.49	2.51 ( 1.1 )	1.33 ( -0.34 )
RENAL CYST	4	RENAL AND URINARY DISORDERS	2.94 ( 1.1 - 7.83 )	2.94 ( 5.11 )	1.96-3.92	2.94 ( 1.29 )	1.55 ( -0.11 )
LYMPHOCYTE COUNT DECREASED	4	INVESTIGATIONS	1.35 ( 0.51 - 3.59 )	1.35 ( 0.36 )	0.37-2.33	1.35 ( 0.59 )	0.43 ( -1.24 )
HAEMOLYTIC ANAEMIA	4	BLOOD AND LYMPHATIC SYSTEM DISORDERS	2.69 ( 1.01 - 7.18 )	2.69 ( 4.26 )	1.71-3.67	2.69 ( 1.19 )	1.43 ( -0.24 )
SKIN LESION	4	SKIN AND SUBCUTANEOUS TISSUE DISORDERS	0.9 ( 0.34 - 2.41 )	0.9 ( 0.04 )	-0.08-1.88	0.9 ( 0.4 )	-0.15 ( -1.81 )
ATYPICAL MYCOBACTERIAL INFECTION	4	INFECTIONS AND INFESTATIONS	20.17 ( 7.56 - 53.86 )	20.17 ( 72.58 )	19.18-21.15	20.09 ( 8.83 )	4.33 ( 2.66 )
THERAPY PARTIAL RESPONDER	4	GENERAL DISORDERS AND ADMINISTRATION SITE CONDITIONS	2.54 ( 0.95 - 6.77 )	2.54 ( 3.74 )	1.56-3.52	2.54 ( 1.12 )	1.34 ( -0.32 )
STAPHYLOCOCCAL BACTERAEMIA	4	INFECTIONS AND INFESTATIONS	6.04 ( 2.27 - 16.11 )	6.04 ( 16.8 )	5.06-7.02	6.03 ( 2.66 )	2.59 ( 0.93 )
WRONG PRODUCT ADMINISTERED	4	INJURY, POISONING AND PROCEDURAL COMPLICATIONS	1.52 ( 0.57 - 4.05 )	1.52 ( 0.71 )	0.54-2.5	1.52 ( 0.67 )	0.6 ( -1.06 )
AORTIC DILATATION	4	VASCULAR DISORDERS	23.06 ( 8.63 - 61.58 )	23.05 ( 84 )	22.07-24.03	22.95 ( 10.09 )	4.52 ( 2.85 )
SWELLING OF EYELID	4	EYE DISORDERS	5.25 ( 1.97 - 13.99 )	5.24 ( 13.72 )	4.26-6.22	5.24 ( 2.31 )	2.39 ( 0.72 )
GLYCOSYLATED HAEMOGLOBIN INCREASED	4	INVESTIGATIONS	1.01 ( 0.38 - 2.68 )	1.01 ( 0 )	0.03-1.99	1.01 ( 0.44 )	0.01 ( -1.66 )
RECTAL PROLAPSE	4	GASTROINTESTINAL DISORDERS	19.87 ( 7.44 - 53.04 )	19.86 ( 71.36 )	18.88-20.84	19.79 ( 8.7 )	4.31 ( 2.64 )
VENA CAVA INJURY	4	INJURY, POISONING AND PROCEDURAL COMPLICATIONS	266.66 ( 97.61 - 728.49 )	266.55 ( 1006.61 )	265.55-267.56	253.6 ( 109.38 )	7.99 ( 6.29 )
ACTIVATED PARTIAL THROMBOPLASTIN TIME PROLONGED	4	INVESTIGATIONS	4.5 ( 1.69 - 12.01 )	4.5 ( 10.89 )	3.52-5.48	4.5 ( 1.98 )	2.17 ( 0.5 )
INTRADUCTAL PAPILLARY MUCINOUS NEOPLASM	4	NEOPLASMS BENIGN, MALIGNANT AND UNSPECIFIED (INCL CYSTS AND POLYPS)	105.05 ( 39.03 - 282.72 )	105.01 ( 403.9 )	104.02-106	102.95 ( 44.96 )	6.69 ( 5.01 )
HYPERPARATHYROIDISM SECONDARY	4	ENDOCRINE DISORDERS	8.75 ( 3.28 - 23.33 )	8.74 ( 27.39 )	7.76-9.72	8.73 ( 3.84 )	3.13 ( 1.46 )
MYOCLONUS	4	NERVOUS SYSTEM DISORDERS	2.02 ( 0.76 - 5.39 )	2.02 ( 2.06 )	1.04-3	2.02 ( 0.89 )	1.02 ( -0.65 )
GASTRIC CANCER	4	NEOPLASMS BENIGN, MALIGNANT AND UNSPECIFIED (INCL CYSTS AND POLYPS)	0.85 ( 0.32 - 2.26 )	0.85 ( 0.11 )	-0.13-1.83	0.85 ( 0.37 )	-0.24 ( -1.9 )
MYOPATHY	4	MUSCULOSKELETAL AND CONNECTIVE TISSUE DISORDERS	2.8 ( 1.05 - 7.46 )	2.8 ( 4.61 )	1.82-3.78	2.8 ( 1.23 )	1.48 ( -0.18 )
HYPERURICAEMIA	4	METABOLISM AND NUTRITION DISORDERS	5.95 ( 2.23 - 15.87 )	5.95 ( 16.45 )	4.97-6.93	5.94 ( 2.62 )	2.57 ( 0.9 )
HYPERCREATININAEMIA	3	METABOLISM AND NUTRITION DISORDERS	37.4 ( 12.01 - 116.47 )	37.39 ( 105.5 )	36.26-38.53	37.13 ( 14.36 )	5.21 ( 3.54 )
TOXIC SKIN ERUPTION	3	SKIN AND SUBCUTANEOUS TISSUE DISORDERS	1.82 ( 0.59 - 5.66 )	1.82 ( 1.11 )	0.69-2.95	1.82 ( 0.71 )	0.87 ( -0.8 )
PUNCTATE KERATITIS	3	EYE DISORDERS	21.97 ( 7.07 - 68.29 )	21.96 ( 59.77 )	20.83-23.1	21.87 ( 8.47 )	4.45 ( 2.78 )
IMMUNOSUPPRESSANT DRUG LEVEL INCREASED	3	INVESTIGATIONS	6 ( 1.93 - 18.62 )	6 ( 12.49 )	4.87-7.13	5.99 ( 2.32 )	2.58 ( 0.92 )
SUICIDAL IDEATION	3	PSYCHIATRIC DISORDERS	0.2 ( 0.06 - 0.61 )	0.2 ( 9.74 )	-0.93-1.33	0.2 ( 0.08 )	-2.33 ( -4 )
SKIN DISORDER	3	SKIN AND SUBCUTANEOUS TISSUE DISORDERS	0.56 ( 0.18 - 1.75 )	0.56 ( 1.02 )	-0.57-1.69	0.56 ( 0.22 )	-0.83 ( -2.49 )
DYSGEUSIA	3	NERVOUS SYSTEM DISORDERS	0.23 ( 0.08 - 0.73 )	0.23 ( 7.51 )	-0.9-1.37	0.23 ( 0.09 )	-2.09 ( -3.76 )
FEEDING DISORDER	3	METABOLISM AND NUTRITION DISORDERS	1.07 ( 0.34 - 3.32 )	1.07 ( 0.01 )	-0.06-2.2	1.07 ( 0.41 )	0.1 ( -1.57 )
EYE DISORDER	3	EYE DISORDERS	0.57 ( 0.18 - 1.77 )	0.57 ( 0.97 )	-0.56-1.7	0.57 ( 0.22 )	-0.81 ( -2.47 )
HEMIPLEGIA	3	NERVOUS SYSTEM DISORDERS	2.11 ( 0.68 - 6.56 )	2.11 ( 1.76 )	0.98-3.24	2.11 ( 0.82 )	1.08 ( -0.59 )
OSTEOPOROSIS	3	MUSCULOSKELETAL AND CONNECTIVE TISSUE DISORDERS	0.43 ( 0.14 - 1.34 )	0.43 ( 2.26 )	-0.7-1.56	0.43 ( 0.17 )	-1.21 ( -2.88 )
HAEMATOCRIT DECREASED	3	INVESTIGATIONS	0.86 ( 0.28 - 2.66 )	0.86 ( 0.07 )	-0.27-1.99	0.86 ( 0.33 )	-0.22 ( -1.89 )
ANURIA	3	RENAL AND URINARY DISORDERS	2.02 ( 0.65 - 6.25 )	2.01 ( 1.53 )	0.88-3.15	2.01 ( 0.78 )	1.01 ( -0.66 )
ENTEROCOCCAL INFECTION	3	INFECTIONS AND INFESTATIONS	3.91 ( 1.26 - 12.15 )	3.91 ( 6.5 )	2.78-5.05	3.91 ( 1.52 )	1.97 ( 0.3 )
SPINAL COMPRESSION FRACTURE	3	INJURY, POISONING AND PROCEDURAL COMPLICATIONS	1.97 ( 0.64 - 6.12 )	1.97 ( 1.44 )	0.84-3.1	1.97 ( 0.76 )	0.98 ( -0.69 )
SQUAMOUS CELL CARCINOMA	3	NEOPLASMS BENIGN, MALIGNANT AND UNSPECIFIED (INCL CYSTS AND POLYPS)	1.96 ( 0.63 - 6.08 )	1.96 ( 1.41 )	0.83-3.09	1.96 ( 0.76 )	0.97 ( -0.7 )
COMPLICATIONS OF TRANSPLANT SURGERY	3	INJURY, POISONING AND PROCEDURAL COMPLICATIONS	33.4 ( 10.73 - 103.96 )	33.39 ( 93.66 )	32.26-34.53	33.18 ( 12.83 )	5.05 ( 3.38 )
TRANSPLANTATION COMPLICATION	3	INJURY, POISONING AND PROCEDURAL COMPLICATIONS	49.99 ( 16.03 - 155.88 )	49.98 ( 142.63 )	48.84-51.12	49.51 ( 19.12 )	5.63 ( 3.96 )
EXPOSURE VIA INHALATION	3	INJURY, POISONING AND PROCEDURAL COMPLICATIONS	86.66 ( 27.68 - 271.27 )	86.63 ( 249.76 )	85.49-87.77	85.23 ( 32.8 )	6.41 ( 4.73 )
BONE DISORDER	3	MUSCULOSKELETAL AND CONNECTIVE TISSUE DISORDERS	0.93 ( 0.3 - 2.87 )	0.93 ( 0.02 )	-0.21-2.06	0.93 ( 0.36 )	-0.11 ( -1.78 )
HALLUCINATION, AUDITORY	3	PSYCHIATRIC DISORDERS	1.15 ( 0.37 - 3.58 )	1.15 ( 0.06 )	0.02-2.29	1.15 ( 0.45 )	0.21 ( -1.46 )
STEVENS-JOHNSON SYNDROME	3	SKIN AND SUBCUTANEOUS TISSUE DISORDERS	0.8 ( 0.26 - 2.47 )	0.8 ( 0.15 )	-0.33-1.93	0.8 ( 0.31 )	-0.33 ( -1.99 )
DRUG-INDUCED LIVER INJURY	3	HEPATOBILIARY DISORDERS	0.71 ( 0.23 - 2.22 )	0.71 ( 0.34 )	-0.42-1.85	0.71 ( 0.28 )	-0.48 ( -2.15 )
UPPER GASTROINTESTINAL HAEMORRHAGE	3	GASTROINTESTINAL DISORDERS	1.05 ( 0.34 - 3.25 )	1.05 ( 0.01 )	-0.08-2.18	1.05 ( 0.41 )	0.07 ( -1.6 )
PALPITATIONS	3	CARDIAC DISORDERS	0.16 ( 0.05 - 0.48 )	0.16 ( 13.66 )	-0.97-1.29	0.16 ( 0.06 )	-2.68 ( -4.34 )
ARRHYTHMIA	3	CARDIAC DISORDERS	0.38 ( 0.12 - 1.16 )	0.38 ( 3.11 )	-0.76-1.51	0.38 ( 0.15 )	-1.41 ( -3.08 )
HYPOCALCAEMIA	3	METABOLISM AND NUTRITION DISORDERS	0.98 ( 0.32 - 3.05 )	0.98 ( 0 )	-0.15-2.12	0.98 ( 0.38 )	-0.02 ( -1.69 )
GALLBLADDER DISORDER	3	HEPATOBILIARY DISORDERS	0.98 ( 0.32 - 3.05 )	0.98 ( 0 )	-0.15-2.12	0.98 ( 0.38 )	-0.02 ( -1.69 )
INAPPROPRIATE SCHEDULE OF PRODUCT ADMINISTRATION	3	INJURY, POISONING AND PROCEDURAL COMPLICATIONS	0.08 ( 0.03 - 0.25 )	0.08 ( 31.42 )	-1.05-1.21	0.08 ( 0.03 )	-3.63 ( -5.29 )
THERAPEUTIC PRODUCT EFFECT DECREASED	3	GENERAL DISORDERS AND ADMINISTRATION SITE CONDITIONS	0.18 ( 0.06 - 0.55 )	0.18 ( 11.44 )	-0.95-1.31	0.18 ( 0.07 )	-2.49 ( -4.16 )
DYSPEPSIA	3	GASTROINTESTINAL DISORDERS	0.19 ( 0.06 - 0.59 )	0.19 ( 10.32 )	-0.94-1.32	0.19 ( 0.07 )	-2.39 ( -4.06 )
EPISTAXIS	3	RESPIRATORY, THORACIC AND MEDIASTINAL DISORDERS	0.24 ( 0.08 - 0.75 )	0.24 ( 7.16 )	-0.89-1.37	0.24 ( 0.09 )	-2.05 ( -3.72 )
MENTAL IMPAIRMENT	3	NERVOUS SYSTEM DISORDERS	0.75 ( 0.24 - 2.32 )	0.75 ( 0.26 )	-0.38-1.88	0.75 ( 0.29 )	-0.42 ( -2.09 )
ARTHRITIS	3	MUSCULOSKELETAL AND CONNECTIVE TISSUE DISORDERS	0.23 ( 0.07 - 0.71 )	0.23 ( 7.72 )	-0.9-1.36	0.23 ( 0.09 )	-2.12 ( -3.78 )
SLEEP DISORDER	3	PSYCHIATRIC DISORDERS	0.27 ( 0.09 - 0.85 )	0.27 ( 5.77 )	-0.86-1.41	0.27 ( 0.11 )	-1.87 ( -3.53 )
MENINGITIS	3	INFECTIONS AND INFESTATIONS	2.78 ( 0.9 - 8.61 )	2.78 ( 3.41 )	1.64-3.91	2.78 ( 1.08 )	1.47 ( -0.19 )
AMNESIA	3	NERVOUS SYSTEM DISORDERS	0.27 ( 0.09 - 0.84 )	0.27 ( 5.93 )	-0.86-1.4	0.27 ( 0.1 )	-1.89 ( -3.56 )
BURNING SENSATION	3	NERVOUS SYSTEM DISORDERS	0.26 ( 0.08 - 0.8 )	0.26 ( 6.44 )	-0.87-1.39	0.26 ( 0.1 )	-1.96 ( -3.62 )
MICTURITION URGENCY	3	RENAL AND URINARY DISORDERS	1.64 ( 0.53 - 5.09 )	1.64 ( 0.75 )	0.51-2.77	1.64 ( 0.64 )	0.71 ( -0.95 )
EYE PAIN	3	EYE DISORDERS	0.36 ( 0.12 - 1.12 )	0.36 ( 3.38 )	-0.77-1.49	0.36 ( 0.14 )	-1.47 ( -3.13 )
ADENOVIRAL HEPATITIS	3	INFECTIONS AND INFESTATIONS	76.09 ( 24.33 - 237.91 )	76.07 ( 219.03 )	74.93-77.2	74.98 ( 28.89 )	6.23 ( 4.55 )
HEPATIC NECROSIS	3	HEPATOBILIARY DISORDERS	4.55 ( 1.47 - 14.1 )	4.54 ( 8.29 )	3.41-5.68	4.54 ( 1.76 )	2.18 ( 0.52 )
VENOUS HAEMORRHAGE	3	VASCULAR DISORDERS	58.86 ( 18.86 - 183.7 )	58.84 ( 168.67 )	57.7-59.98	58.2 ( 22.45 )	5.86 ( 4.19 )
MALIGNANT NEOPLASM PROGRESSION	3	NEOPLASMS BENIGN, MALIGNANT AND UNSPECIFIED (INCL CYSTS AND POLYPS)	0.19 ( 0.06 - 0.59 )	0.19 ( 10.44 )	-0.94-1.32	0.19 ( 0.07 )	-2.4 ( -4.07 )
MUSCLE HAEMORRHAGE	3	MUSCULOSKELETAL AND CONNECTIVE TISSUE DISORDERS	4.55 ( 1.47 - 14.1 )	4.54 ( 8.29 )	3.41-5.68	4.54 ( 1.76 )	2.18 ( 0.52 )
CROHN'S DISEASE	3	GASTROINTESTINAL DISORDERS	0.3 ( 0.1 - 0.92 )	0.3 ( 5.02 )	-0.84-1.43	0.3 ( 0.11 )	-1.75 ( -3.42 )
HYPOACUSIS	3	EAR AND LABYRINTH DISORDERS	0.37 ( 0.12 - 1.16 )	0.37 ( 3.16 )	-0.76-1.5	0.37 ( 0.14 )	-1.42 ( -3.09 )
OESOPHAGEAL ATRESIA	3	CONGENITAL, FAMILIAL AND GENETIC DISORDERS	27.85 ( 8.95 - 86.64 )	27.85 ( 77.23 )	26.71-28.98	27.7 ( 10.72 )	4.79 ( 3.12 )
OPTIC ISCHAEMIC NEUROPATHY	3	EYE DISORDERS	6.92 ( 2.23 - 21.49 )	6.92 ( 15.18 )	5.79-8.05	6.91 ( 2.68 )	2.79 ( 1.12 )
PAPILLOEDEMA	3	EYE DISORDERS	4.06 ( 1.31 - 12.61 )	4.06 ( 6.92 )	2.93-5.19	4.06 ( 1.57 )	2.02 ( 0.35 )
ALTERED STATE OF CONSCIOUSNESS	3	NERVOUS SYSTEM DISORDERS	0.9 ( 0.29 - 2.78 )	0.9 ( 0.04 )	-0.24-2.03	0.9 ( 0.35 )	-0.16 ( -1.82 )
RENAL TUBULAR ACIDOSIS	3	RENAL AND URINARY DISORDERS	9.06 ( 2.92 - 28.12 )	9.06 ( 21.46 )	7.92-10.19	9.04 ( 3.5 )	3.18 ( 1.51 )
PRODUCT PREPARATION ERROR	3	INJURY, POISONING AND PROCEDURAL COMPLICATIONS	1.11 ( 0.36 - 3.44 )	1.11 ( 0.03 )	-0.02-2.24	1.11 ( 0.43 )	0.15 ( -1.52 )
CONTUSION	3	INJURY, POISONING AND PROCEDURAL COMPLICATIONS	0.19 ( 0.06 - 0.59 )	0.19 ( 10.28 )	-0.94-1.32	0.19 ( 0.07 )	-2.39 ( -4.05 )
NIGHT SWEATS	3	SKIN AND SUBCUTANEOUS TISSUE DISORDERS	0.6 ( 0.19 - 1.85 )	0.6 ( 0.82 )	-0.53-1.73	0.6 ( 0.23 )	-0.75 ( -2.41 )
ESCHERICHIA INFECTION	3	INFECTIONS AND INFESTATIONS	2.35 ( 0.76 - 7.28 )	2.35 ( 2.32 )	1.22-3.48	2.35 ( 0.91 )	1.23 ( -0.44 )
SYSTEMIC CANDIDA	3	INFECTIONS AND INFESTATIONS	8.26 ( 2.66 - 25.64 )	8.26 ( 19.11 )	7.13-9.39	8.25 ( 3.2 )	3.04 ( 1.38 )
MUSCULAR WEAKNESS	3	MUSCULOSKELETAL AND CONNECTIVE TISSUE DISORDERS	0.16 ( 0.05 - 0.5 )	0.16 ( 13.18 )	-0.97-1.29	0.16 ( 0.06 )	-2.64 ( -4.3 )
PULMONARY TUBERCULOSIS	3	INFECTIONS AND INFESTATIONS	4.19 ( 1.35 - 12.99 )	4.19 ( 7.27 )	3.05-5.32	4.18 ( 1.62 )	2.06 ( 0.4 )
HIV INFECTION	3	INFECTIONS AND INFESTATIONS	5.88 ( 1.9 - 18.26 )	5.88 ( 12.14 )	4.75-7.01	5.88 ( 2.28 )	2.55 ( 0.89 )
LIMB INJURY	3	INJURY, POISONING AND PROCEDURAL COMPLICATIONS	0.69 ( 0.22 - 2.13 )	0.69 ( 0.42 )	-0.44-1.82	0.69 ( 0.27 )	-0.54 ( -2.2 )
SUBCUTANEOUS ABSCESS	3	INFECTIONS AND INFESTATIONS	3.72 ( 1.2 - 11.54 )	3.72 ( 5.96 )	2.59-4.85	3.72 ( 1.44 )	1.89 ( 0.23 )
RESPIRATORY TRACT INFECTION	3	INFECTIONS AND INFESTATIONS	0.75 ( 0.24 - 2.32 )	0.75 ( 0.25 )	-0.38-1.88	0.75 ( 0.29 )	-0.42 ( -2.09 )
MYELODYSPLASTIC SYNDROME WITH SINGLE LINEAGE DYSPLASIA	3	NEOPLASMS BENIGN, MALIGNANT AND UNSPECIFIED (INCL CYSTS AND POLYPS)	39.49 ( 12.68 - 122.99 )	39.48 ( 111.66 )	38.34-40.61	39.19 ( 15.15 )	5.29 ( 3.62 )
DIABETES MELLITUS INADEQUATE CONTROL	3	METABOLISM AND NUTRITION DISORDERS	1.02 ( 0.33 - 3.17 )	1.02 ( 0 )	-0.11-2.15	1.02 ( 0.4 )	0.03 ( -1.64 )
HAEMOGLOBINAEMIA	3	BLOOD AND LYMPHATIC SYSTEM DISORDERS	106.11 ( 33.82 - 332.86 )	106.08 ( 306.02 )	104.93-107.22	103.98 ( 39.95 )	6.7 ( 5.02 )
HELICOBACTER GASTRITIS	3	INFECTIONS AND INFESTATIONS	13.34 ( 4.3 - 41.44 )	13.34 ( 34.16 )	12.21-14.47	13.31 ( 5.16 )	3.73 ( 2.07 )
CANDIDA INFECTION	3	INFECTIONS AND INFESTATIONS	0.9 ( 0.29 - 2.8 )	0.9 ( 0.03 )	-0.23-2.03	0.9 ( 0.35 )	-0.15 ( -1.82 )
CENTRAL NERVOUS SYSTEM LESION	3	NERVOUS SYSTEM DISORDERS	1.23 ( 0.4 - 3.83 )	1.23 ( 0.13 )	0.1-2.37	1.23 ( 0.48 )	0.3 ( -1.36 )
NOCARDIOSIS	3	INFECTIONS AND INFESTATIONS	7.68 ( 2.47 - 23.84 )	7.68 ( 17.4 )	6.55-8.81	7.67 ( 2.97 )	2.94 ( 1.27 )
PHLEBITIS	3	VASCULAR DISORDERS	3.41 ( 1.1 - 10.58 )	3.41 ( 5.1 )	2.28-4.54	3.41 ( 1.32 )	1.77 ( 0.1 )
BLOOD LACTATE DEHYDROGENASE INCREASED	3	INVESTIGATIONS	1.06 ( 0.34 - 3.3 )	1.06 ( 0.01 )	-0.07-2.2	1.06 ( 0.41 )	0.09 ( -1.58 )
CONGENITAL CYTOMEGALOVIRUS INFECTION	3	CONGENITAL, FAMILIAL AND GENETIC DISORDERS	148.55 ( 47.14 - 468.14 )	148.51 ( 427.34 )	147.36-149.66	144.41 ( 55.27 )	7.17 ( 5.49 )
PARALYSIS	3	NERVOUS SYSTEM DISORDERS	1.23 ( 0.4 - 3.81 )	1.23 ( 0.13 )	0.1-2.36	1.23 ( 0.48 )	0.3 ( -1.37 )
PALLOR	3	VASCULAR DISORDERS	0.65 ( 0.21 - 2.02 )	0.65 ( 0.56 )	-0.48-1.78	0.65 ( 0.25 )	-0.62 ( -2.28 )
PRESCRIBED UNDERDOSE	3	INJURY, POISONING AND PROCEDURAL COMPLICATIONS	0.95 ( 0.31 - 2.93 )	0.95 ( 0.01 )	-0.19-2.08	0.95 ( 0.37 )	-0.08 ( -1.75 )
GENITAL LESION	3	REPRODUCTIVE SYSTEM AND BREAST DISORDERS	43.57 ( 13.98 - 135.76 )	43.56 ( 123.7 )	42.42-44.69	43.2 ( 16.69 )	5.43 ( 3.76 )
CEREBRAL TOXOPLASMOSIS	3	INFECTIONS AND INFESTATIONS	21.34 ( 6.86 - 66.32 )	21.33 ( 57.9 )	20.2-22.47	21.25 ( 8.23 )	4.41 ( 2.74 )
ENTERITIS	3	GASTROINTESTINAL DISORDERS	2.85 ( 0.92 - 8.85 )	2.85 ( 3.61 )	1.72-3.98	2.85 ( 1.11 )	1.51 ( -0.16 )
RETINAL SCAR	3	EYE DISORDERS	37.77 ( 12.13 - 117.6 )	37.76 ( 106.57 )	36.62-38.89	37.49 ( 14.49 )	5.23 ( 3.56 )
HAEMATOMA	3	VASCULAR DISORDERS	0.67 ( 0.22 - 2.08 )	0.67 ( 0.48 )	-0.46-1.8	0.67 ( 0.26 )	-0.57 ( -2.24 )
HAEMORRHAGIC STROKE	3	NERVOUS SYSTEM DISORDERS	2.26 ( 0.73 - 7.02 )	2.26 ( 2.11 )	1.13-3.39	2.26 ( 0.88 )	1.18 ( -0.49 )
LOCALISED OEDEMA	3	GENERAL DISORDERS AND ADMINISTRATION SITE CONDITIONS	3.84 ( 1.24 - 11.91 )	3.84 ( 6.29 )	2.71-4.97	3.84 ( 1.49 )	1.94 ( 0.27 )
RALES	3	RESPIRATORY, THORACIC AND MEDIASTINAL DISORDERS	2.98 ( 0.96 - 9.23 )	2.98 ( 3.93 )	1.84-4.11	2.97 ( 1.15 )	1.57 ( -0.09 )
HERPES VIRUS INFECTION	3	INFECTIONS AND INFESTATIONS	3.19 ( 1.03 - 9.89 )	3.19 ( 4.5 )	2.05-4.32	3.18 ( 1.24 )	1.67 ( 0 )
IMPAIRED GASTRIC EMPTYING	3	GASTROINTESTINAL DISORDERS	2.39 ( 0.77 - 7.4 )	2.38 ( 2.41 )	1.25-3.52	2.38 ( 0.92 )	1.25 ( -0.41 )
HYPERCOAGULATION	3	BLOOD AND LYMPHATIC SYSTEM DISORDERS	9.08 ( 2.93 - 28.2 )	9.08 ( 21.54 )	7.95-10.21	9.07 ( 3.51 )	3.18 ( 1.51 )
OVERWEIGHT	3	METABOLISM AND NUTRITION DISORDERS	3.42 ( 1.1 - 10.61 )	3.42 ( 5.13 )	2.29-4.55	3.42 ( 1.32 )	1.77 ( 0.11 )
ACCIDENTAL OVERDOSE	3	INJURY, POISONING AND PROCEDURAL COMPLICATIONS	0.53 ( 0.17 - 1.64 )	0.53 ( 1.25 )	-0.6-1.66	0.53 ( 0.21 )	-0.92 ( -2.58 )
LIVER TRANSPLANT REJECTION	3	IMMUNE SYSTEM DISORDERS	10.32 ( 3.32 - 32.03 )	10.31 ( 25.18 )	9.18-11.45	10.29 ( 3.99 )	3.36 ( 1.7 )
PLATELET TRANSFUSION	3	SURGICAL AND MEDICAL PROCEDURES	15.46 ( 4.98 - 48.02 )	15.45 ( 40.44 )	14.32-16.59	15.41 ( 5.97 )	3.95 ( 2.28 )
NEUTROPENIC COLITIS	3	GASTROINTESTINAL DISORDERS	9.92 ( 3.19 - 30.78 )	9.91 ( 24 )	8.78-11.05	9.9 ( 3.84 )	3.31 ( 1.64 )
HEART TRANSPLANT REJECTION	3	IMMUNE SYSTEM DISORDERS	17.91 ( 5.76 - 55.64 )	17.9 ( 47.71 )	16.77-19.04	17.84 ( 6.91 )	4.16 ( 2.49 )
HUMAN HERPESVIRUS 6 INFECTION	3	INFECTIONS AND INFESTATIONS	9.43 ( 3.04 - 29.27 )	9.43 ( 22.56 )	8.3-10.56	9.41 ( 3.65 )	3.23 ( 1.57 )
AUTOIMMUNE NEUTROPENIA	3	BLOOD AND LYMPHATIC SYSTEM DISORDERS	62.39 ( 19.98 - 194.8 )	62.37 ( 179.02 )	61.24-63.51	61.65 ( 23.78 )	5.95 ( 4.27 )
GASTROINTESTINAL PAIN	3	GASTROINTESTINAL DISORDERS	1.74 ( 0.56 - 5.39 )	1.74 ( 0.94 )	0.6-2.87	1.74 ( 0.67 )	0.8 ( -0.87 )
GASTROINTESTINAL ULCER	3	GASTROINTESTINAL DISORDERS	8.01 ( 2.58 - 24.85 )	8 ( 18.36 )	6.87-9.14	7.99 ( 3.1 )	3 ( 1.33 )
PNEUMONIA FUNGAL	3	INFECTIONS AND INFESTATIONS	4.18 ( 1.35 - 12.96 )	4.18 ( 7.24 )	3.05-5.31	4.17 ( 1.62 )	2.06 ( 0.39 )
LEUKOPENIA NEONATAL	3	PREGNANCY, PUERPERIUM AND PERINATAL CONDITIONS	278.54 ( 87.17 - 890.01 )	278.45 ( 787.2 )	277.29-279.61	264.34 ( 100.01 )	8.05 ( 6.34 )
BLOOD PRESSURE FLUCTUATION	3	VASCULAR DISORDERS	0.72 ( 0.23 - 2.23 )	0.72 ( 0.33 )	-0.41-1.85	0.72 ( 0.28 )	-0.47 ( -2.14 )
ARTERIOSCLEROSIS	3	VASCULAR DISORDERS	1.78 ( 0.57 - 5.52 )	1.78 ( 1.03 )	0.65-2.91	1.78 ( 0.69 )	0.83 ( -0.83 )
VITAMIN D DECREASED	3	INVESTIGATIONS	2.09 ( 0.67 - 6.48 )	2.09 ( 1.7 )	0.96-3.22	2.09 ( 0.81 )	1.06 ( -0.6 )
ATRIOVENTRICULAR BLOCK	3	CARDIAC DISORDERS	2.35 ( 0.76 - 7.3 )	2.35 ( 2.34 )	1.22-3.49	2.35 ( 0.91 )	1.23 ( -0.43 )
STAPHYLOCOCCAL MEDIASTINITIS	3	INFECTIONS AND INFESTATIONS	866.55 ( 255.21 - 2942.33 )	866.3 ( 2222.48 )	865.07-867.52	742.68 ( 267.05 )	9.54 ( 7.76 )
TOOTH INFECTION	3	INFECTIONS AND INFESTATIONS	1.38 ( 0.44 - 4.27 )	1.38 ( 0.31 )	0.25-2.51	1.38 ( 0.53 )	0.46 ( -1.2 )
OSTEOMYELITIS	3	INFECTIONS AND INFESTATIONS	0.96 ( 0.31 - 2.98 )	0.96 ( 0 )	-0.17-2.09	0.96 ( 0.37 )	-0.06 ( -1.72 )
UPPER LIMB FRACTURE	3	INJURY, POISONING AND PROCEDURAL COMPLICATIONS	0.88 ( 0.28 - 2.71 )	0.88 ( 0.05 )	-0.26-2.01	0.88 ( 0.34 )	-0.19 ( -1.86 )
NEOPLASM	3	NEOPLASMS BENIGN, MALIGNANT AND UNSPECIFIED (INCL CYSTS AND POLYPS)	1.63 ( 0.52 - 5.04 )	1.62 ( 0.72 )	0.49-2.76	1.62 ( 0.63 )	0.7 ( -0.97 )
ENTEROVESICAL FISTULA	3	GASTROINTESTINAL DISORDERS	24.33 ( 7.83 - 75.66 )	24.33 ( 66.79 )	23.19-25.46	24.22 ( 9.37 )	4.6 ( 2.93 )
FIXED ERUPTION	3	SKIN AND SUBCUTANEOUS TISSUE DISORDERS	11.88 ( 3.83 - 36.89 )	11.88 ( 29.81 )	10.74-13.01	11.85 ( 4.59 )	3.57 ( 1.9 )
THERAPEUTIC PRODUCT EFFECT INCOMPLETE	3	GENERAL DISORDERS AND ADMINISTRATION SITE CONDITIONS	0.17 ( 0.05 - 0.53 )	0.17 ( 12.15 )	-0.96-1.3	0.17 ( 0.07 )	-2.55 ( -4.22 )
IMMUNE-MEDIATED CYTOPENIA	3	BLOOD AND LYMPHATIC SYSTEM DISORDERS	324.96 ( 101.2 - 1043.46 )	324.86 ( 911.62 )	323.69-326.03	305.81 ( 115.22 )	8.26 ( 6.54 )
HAEMODYNAMIC INSTABILITY	3	VASCULAR DISORDERS	2.6 ( 0.84 - 8.07 )	2.6 ( 2.95 )	1.47-3.73	2.6 ( 1.01 )	1.38 ( -0.29 )
ADENOCARCINOMA PANCREAS	3	NEOPLASMS BENIGN, MALIGNANT AND UNSPECIFIED (INCL CYSTS AND POLYPS)	13.29 ( 4.28 - 41.26 )	13.28 ( 33.99 )	12.15-14.42	13.25 ( 5.13 )	3.73 ( 2.06 )
NORMOCHROMIC NORMOCYTIC ANAEMIA	3	BLOOD AND LYMPHATIC SYSTEM DISORDERS	5.85 ( 1.88 - 18.15 )	5.85 ( 12.04 )	4.71-6.98	5.84 ( 2.26 )	2.55 ( 0.88 )
MONKEYPOX	3	INFECTIONS AND INFESTATIONS	120.91 ( 38.48 - 379.91 )	120.88 ( 348.56 )	119.73-122.02	118.15 ( 45.33 )	6.88 ( 5.2 )
STENOTROPHOMONAS INFECTION	3	INFECTIONS AND INFESTATIONS	15 ( 4.83 - 46.59 )	14.99 ( 39.07 )	13.86-16.13	14.95 ( 5.79 )	3.9 ( 2.23 )
CD4 LYMPHOCYTES DECREASED	2	INVESTIGATIONS	5.35 ( 1.34 - 21.43 )	5.35 ( 7.07 )	3.97-6.74	5.35 ( 1.68 )	2.42 ( 0.75 )
TUBULOINTERSTITIAL NEPHRITIS	2	RENAL AND URINARY DISORDERS	0.62 ( 0.15 - 2.46 )	0.62 ( 0.48 )	-0.77-2	0.62 ( 0.19 )	-0.7 ( -2.37 )
GASTROENTERITIS VIRAL	2	INFECTIONS AND INFESTATIONS	0.71 ( 0.18 - 2.82 )	0.71 ( 0.24 )	-0.68-2.09	0.71 ( 0.22 )	-0.5 ( -2.17 )
HYPOSPADIAS	2	CONGENITAL, FAMILIAL AND GENETIC DISORDERS	5.65 ( 1.41 - 22.61 )	5.65 ( 7.65 )	4.26-7.04	5.64 ( 1.77 )	2.5 ( 0.83 )
INTESTINAL PERFORATION	2	GASTROINTESTINAL DISORDERS	1.1 ( 0.28 - 4.42 )	1.1 ( 0.02 )	-0.28-2.49	1.1 ( 0.35 )	0.14 ( -1.52 )
POST PROCEDURAL HAEMORRHAGE	2	INJURY, POISONING AND PROCEDURAL COMPLICATIONS	1.01 ( 0.25 - 4.04 )	1.01 ( 0 )	-0.37-2.4	1.01 ( 0.32 )	0.02 ( -1.65 )
GENITAL HAEMORRHAGE	2	REPRODUCTIVE SYSTEM AND BREAST DISORDERS	0.91 ( 0.23 - 3.66 )	0.91 ( 0.02 )	-0.47-2.3	0.91 ( 0.29 )	-0.13 ( -1.8 )
MACULAR OEDEMA	2	EYE DISORDERS	2.2 ( 0.55 - 8.78 )	2.2 ( 1.3 )	0.81-3.58	2.19 ( 0.69 )	1.13 ( -0.53 )
HEPATIC CANCER	2	NEOPLASMS BENIGN, MALIGNANT AND UNSPECIFIED (INCL CYSTS AND POLYPS)	0.41 ( 0.1 - 1.65 )	0.41 ( 1.67 )	-0.97-1.8	0.41 ( 0.13 )	-1.27 ( -2.94 )
HEPATIC CIRRHOSIS	2	HEPATOBILIARY DISORDERS	0.69 ( 0.17 - 2.76 )	0.69 ( 0.28 )	-0.7-2.08	0.69 ( 0.22 )	-0.54 ( -2.2 )
CARDIOGENIC SHOCK	2	CARDIAC DISORDERS	0.92 ( 0.23 - 3.66 )	0.92 ( 0.02 )	-0.47-2.3	0.92 ( 0.29 )	-0.13 ( -1.79 )
OEDEMATOUS KIDNEY	2	RENAL AND URINARY DISORDERS	46.21 ( 11.48 - 185.94 )	46.2 ( 87.67 )	44.81-47.59	45.8 ( 14.29 )	5.52 ( 3.84 )
PRODUCT CONTAINER ISSUE	2	PRODUCT ISSUES	1.61 ( 0.4 - 6.44 )	1.61 ( 0.46 )	0.22-2.99	1.61 ( 0.5 )	0.69 ( -0.98 )
VARICELLA	2	INFECTIONS AND INFESTATIONS	5.14 ( 1.28 - 20.58 )	5.14 ( 6.67 )	3.75-6.53	5.14 ( 1.61 )	2.36 ( 0.69 )
DYSARTHRIA	2	NERVOUS SYSTEM DISORDERS	0.32 ( 0.08 - 1.27 )	0.32 ( 2.92 )	-1.07-1.7	0.32 ( 0.1 )	-1.65 ( -3.32 )
FEELING COLD	2	GENERAL DISORDERS AND ADMINISTRATION SITE CONDITIONS	0.43 ( 0.11 - 1.73 )	0.43 ( 1.49 )	-0.95-1.82	0.43 ( 0.14 )	-1.21 ( -2.88 )
LIP SWELLING	2	GASTROINTESTINAL DISORDERS	0.37 ( 0.09 - 1.48 )	0.37 ( 2.16 )	-1.02-1.75	0.37 ( 0.12 )	-1.44 ( -3.1 )
MENTAL STATUS CHANGES	2	PSYCHIATRIC DISORDERS	0.43 ( 0.11 - 1.73 )	0.43 ( 1.5 )	-0.95-1.82	0.43 ( 0.14 )	-1.21 ( -2.88 )
PULMONARY OEDEMA	2	RESPIRATORY, THORACIC AND MEDIASTINAL DISORDERS	0.27 ( 0.07 - 1.07 )	0.27 ( 3.99 )	-1.12-1.65	0.27 ( 0.08 )	-1.9 ( -3.56 )
LACTIC ACIDOSIS	2	METABOLISM AND NUTRITION DISORDERS	0.41 ( 0.1 - 1.65 )	0.41 ( 1.68 )	-0.97-1.8	0.41 ( 0.13 )	-1.28 ( -2.95 )
MATERNAL EXPOSURE TIMING UNSPECIFIED	2	INJURY, POISONING AND PROCEDURAL COMPLICATIONS	3.84 ( 0.96 - 15.37 )	3.84 ( 4.2 )	2.45-5.23	3.84 ( 1.2 )	1.94 ( 0.27 )
GAIT INABILITY	2	GENERAL DISORDERS AND ADMINISTRATION SITE CONDITIONS	0.21 ( 0.05 - 0.85 )	0.21 ( 5.83 )	-1.17-1.6	0.21 ( 0.07 )	-2.23 ( -3.9 )
EATING DISORDER	2	PSYCHIATRIC DISORDERS	0.56 ( 0.14 - 2.24 )	0.56 ( 0.7 )	-0.83-1.95	0.56 ( 0.18 )	-0.84 ( -2.5 )
PRODUCT SUBSTITUTION ISSUE	2	PRODUCT ISSUES	0.21 ( 0.05 - 0.84 )	0.21 ( 5.9 )	-1.17-1.6	0.21 ( 0.07 )	-2.24 ( -3.91 )
SUSPECTED COUNTERFEIT PRODUCT	2	PRODUCT ISSUES	3.6 ( 0.9 - 14.42 )	3.6 ( 3.76 )	2.22-4.99	3.6 ( 1.13 )	1.85 ( 0.18 )
BLOOD IRON DECREASED	2	INVESTIGATIONS	1.11 ( 0.28 - 4.44 )	1.11 ( 0.02 )	-0.28-2.5	1.11 ( 0.35 )	0.15 ( -1.52 )
ANOGENITAL WARTS	2	NEOPLASMS BENIGN, MALIGNANT AND UNSPECIFIED (INCL CYSTS AND POLYPS)	12.57 ( 3.14 - 50.36 )	12.57 ( 21.25 )	11.18-13.96	12.54 ( 3.93 )	3.65 ( 1.98 )
MUSCULOSKELETAL STIFFNESS	2	MUSCULOSKELETAL AND CONNECTIVE TISSUE DISORDERS	0.14 ( 0.03 - 0.55 )	0.14 ( 10.83 )	-1.25-1.52	0.14 ( 0.04 )	-2.86 ( -4.53 )
SKIN DISCOLOURATION	2	SKIN AND SUBCUTANEOUS TISSUE DISORDERS	0.26 ( 0.07 - 1.05 )	0.26 ( 4.11 )	-1.12-1.65	0.26 ( 0.08 )	-1.92 ( -3.59 )
DEVICE RELATED INFECTION	2	INFECTIONS AND INFESTATIONS	0.7 ( 0.18 - 2.8 )	0.7 ( 0.26 )	-0.68-2.09	0.7 ( 0.22 )	-0.51 ( -2.18 )
OSTEOPENIA	2	MUSCULOSKELETAL AND CONNECTIVE TISSUE DISORDERS	0.75 ( 0.19 - 3.02 )	0.75 ( 0.16 )	-0.63-2.14	0.75 ( 0.24 )	-0.41 ( -2.07 )
RHINORRHOEA	2	RESPIRATORY, THORACIC AND MEDIASTINAL DISORDERS	0.2 ( 0.05 - 0.78 )	0.2 ( 6.63 )	-1.19-1.58	0.2 ( 0.06 )	-2.35 ( -4.02 )
WHEEZING	2	RESPIRATORY, THORACIC AND MEDIASTINAL DISORDERS	0.22 ( 0.06 - 0.89 )	0.22 ( 5.4 )	-1.16-1.61	0.22 ( 0.07 )	-2.16 ( -3.83 )
BLOOD BILIRUBIN INCREASED	2	INVESTIGATIONS	0.44 ( 0.11 - 1.74 )	0.44 ( 1.46 )	-0.95-1.82	0.44 ( 0.14 )	-1.2 ( -2.87 )
CEREBRAL DISORDER	2	NERVOUS SYSTEM DISORDERS	1.7 ( 0.43 - 6.82 )	1.7 ( 0.58 )	0.32-3.09	1.7 ( 0.53 )	0.77 ( -0.9 )
RETCHING	2	GASTROINTESTINAL DISORDERS	0.58 ( 0.15 - 2.34 )	0.58 ( 0.59 )	-0.8-1.97	0.58 ( 0.18 )	-0.78 ( -2.44 )
RESPIRATORY DISORDER	2	RESPIRATORY, THORACIC AND MEDIASTINAL DISORDERS	0.41 ( 0.1 - 1.64 )	0.41 ( 1.7 )	-0.98-1.8	0.41 ( 0.13 )	-1.29 ( -2.95 )
DRY SKIN	2	SKIN AND SUBCUTANEOUS TISSUE DISORDERS	0.1 ( 0.03 - 0.41 )	0.1 ( 15.94 )	-1.28-1.49	0.1 ( 0.03 )	-3.3 ( -4.97 )
STOMATITIS	2	GASTROINTESTINAL DISORDERS	0.21 ( 0.05 - 0.83 )	0.21 ( 6.09 )	-1.18-1.59	0.21 ( 0.06 )	-2.27 ( -3.94 )
SHOCK	2	VASCULAR DISORDERS	0.55 ( 0.14 - 2.21 )	0.55 ( 0.72 )	-0.83-1.94	0.55 ( 0.17 )	-0.85 ( -2.52 )
CORONAVIRUS INFECTION	2	INFECTIONS AND INFESTATIONS	1.68 ( 0.42 - 6.74 )	1.68 ( 0.56 )	0.3-3.07	1.68 ( 0.53 )	0.75 ( -0.91 )
BREAST CANCER METASTATIC	2	NEOPLASMS BENIGN, MALIGNANT AND UNSPECIFIED (INCL CYSTS AND POLYPS)	1.13 ( 0.28 - 4.52 )	1.13 ( 0.03 )	-0.26-2.52	1.13 ( 0.35 )	0.18 ( -1.49 )
INCORRECT ROUTE OF PRODUCT ADMINISTRATION	2	INJURY, POISONING AND PROCEDURAL COMPLICATIONS	0.22 ( 0.05 - 0.87 )	0.22 ( 5.63 )	-1.17-1.6	0.22 ( 0.07 )	-2.2 ( -3.87 )
SKIN TOXICITY	2	SKIN AND SUBCUTANEOUS TISSUE DISORDERS	2.52 ( 0.63 - 10.08 )	2.52 ( 1.83 )	1.13-3.91	2.52 ( 0.79 )	1.33 ( -0.33 )
VENOOCCLUSIVE DISEASE	2	VASCULAR DISORDERS	4.74 ( 1.18 - 18.97 )	4.74 ( 5.9 )	3.35-6.13	4.74 ( 1.48 )	2.24 ( 0.58 )
BLOOD CALCIUM INCREASED	2	INVESTIGATIONS	1.38 ( 0.34 - 5.52 )	1.38 ( 0.21 )	-0.01-2.77	1.38 ( 0.43 )	0.46 ( -1.2 )
GENERALISED OEDEMA	2	GENERAL DISORDERS AND ADMINISTRATION SITE CONDITIONS	1.02 ( 0.25 - 4.07 )	1.02 ( 0 )	-0.37-2.4	1.02 ( 0.32 )	0.02 ( -1.64 )
CYSTITIS HAEMORRHAGIC	2	RENAL AND URINARY DISORDERS	3.15 ( 0.79 - 12.6 )	3.15 ( 2.93 )	1.76-4.54	3.15 ( 0.99 )	1.65 ( -0.01 )
VISUAL FIELD DEFECT	2	EYE DISORDERS	1.45 ( 0.36 - 5.79 )	1.45 ( 0.28 )	0.06-2.83	1.45 ( 0.45 )	0.53 ( -1.13 )
LYMPHADENOPATHY	2	BLOOD AND LYMPHATIC SYSTEM DISORDERS	0.34 ( 0.09 - 1.37 )	0.34 ( 2.51 )	-1.04-1.73	0.34 ( 0.11 )	-1.54 ( -3.21 )
UROGENITAL DISORDER	2	RENAL AND URINARY DISORDERS	58.74 ( 14.57 - 236.76 )	58.73 ( 112.23 )	57.34-60.13	58.09 ( 18.1 )	5.86 ( 4.18 )
JOINT SWELLING	2	MUSCULOSKELETAL AND CONNECTIVE TISSUE DISORDERS	0.1 ( 0.03 - 0.41 )	0.1 ( 15.57 )	-1.28-1.49	0.1 ( 0.03 )	-3.27 ( -4.94 )
RENAL TRANSPLANT	2	SURGICAL AND MEDICAL PROCEDURES	3.57 ( 0.89 - 14.28 )	3.57 ( 3.69 )	2.18-4.95	3.57 ( 1.12 )	1.83 ( 0.17 )
GASTROINTESTINAL INFECTION	2	INFECTIONS AND INFESTATIONS	1.4 ( 0.35 - 5.62 )	1.4 ( 0.23 )	0.02-2.79	1.4 ( 0.44 )	0.49 ( -1.18 )
VITREOUS OPACITIES	2	EYE DISORDERS	12.88 ( 3.22 - 51.61 )	12.88 ( 21.86 )	11.49-14.27	12.85 ( 4.02 )	3.68 ( 2.01 )
SPLENOMEGALY	2	BLOOD AND LYMPHATIC SYSTEM DISORDERS	1.02 ( 0.26 - 4.09 )	1.02 ( 0 )	-0.36-2.41	1.02 ( 0.32 )	0.03 ( -1.63 )
VENOUS THROMBOSIS LIMB	2	VASCULAR DISORDERS	5.36 ( 1.34 - 21.47 )	5.36 ( 7.09 )	3.98-6.75	5.36 ( 1.68 )	2.42 ( 0.75 )
EYE INFECTION VIRAL	2	INFECTIONS AND INFESTATIONS	39.84 ( 9.91 - 160.16 )	39.83 ( 75.13 )	38.44-41.22	39.53 ( 12.34 )	5.31 ( 3.63 )
OCCUPATIONAL EXPOSURE TO PRODUCT	2	INJURY, POISONING AND PROCEDURAL COMPLICATIONS	1.96 ( 0.49 - 7.86 )	1.96 ( 0.95 )	0.58-3.35	1.96 ( 0.62 )	0.97 ( -0.69 )
LETHARGY	2	NERVOUS SYSTEM DISORDERS	0.21 ( 0.05 - 0.83 )	0.21 ( 6.03 )	-1.18-1.59	0.21 ( 0.07 )	-2.26 ( -3.93 )
BLOOD PRESSURE DECREASED	2	INVESTIGATIONS	0.18 ( 0.05 - 0.73 )	0.18 ( 7.3 )	-1.2-1.57	0.18 ( 0.06 )	-2.45 ( -4.12 )
PROSTATIC SPECIFIC ANTIGEN INCREASED	2	INVESTIGATIONS	0.87 ( 0.22 - 3.49 )	0.87 ( 0.04 )	-0.51-2.26	0.87 ( 0.27 )	-0.19 ( -1.86 )
STRESS	2	PSYCHIATRIC DISORDERS	0.17 ( 0.04 - 0.68 )	0.17 ( 8.05 )	-1.21-1.56	0.17 ( 0.05 )	-2.55 ( -4.21 )
RASH PAPULAR	2	SKIN AND SUBCUTANEOUS TISSUE DISORDERS	0.52 ( 0.13 - 2.09 )	0.52 ( 0.87 )	-0.86-1.91	0.52 ( 0.16 )	-0.93 ( -2.6 )
INFLUENZA LIKE ILLNESS	2	GENERAL DISORDERS AND ADMINISTRATION SITE CONDITIONS	0.14 ( 0.04 - 0.56 )	0.14 ( 10.48 )	-1.24-1.53	0.14 ( 0.04 )	-2.83 ( -4.49 )
PROSTATITIS	2	REPRODUCTIVE SYSTEM AND BREAST DISORDERS	3.88 ( 0.97 - 15.53 )	3.88 ( 4.28 )	2.5-5.27	3.88 ( 1.22 )	1.96 ( 0.29 )
CHOLELITHIASIS	2	HEPATOBILIARY DISORDERS	0.37 ( 0.09 - 1.47 )	0.37 ( 2.18 )	-1.02-1.75	0.37 ( 0.12 )	-1.44 ( -3.11 )
FAECES SOFT	2	GASTROINTESTINAL DISORDERS	1.96 ( 0.49 - 7.86 )	1.96 ( 0.95 )	0.58-3.35	1.96 ( 0.62 )	0.97 ( -0.69 )
BEDRIDDEN	2	SOCIAL CIRCUMSTANCES	0.92 ( 0.23 - 3.68 )	0.92 ( 0.01 )	-0.47-2.31	0.92 ( 0.29 )	-0.12 ( -1.79 )
DISORIENTATION	2	PSYCHIATRIC DISORDERS	0.3 ( 0.07 - 1.18 )	0.3 ( 3.37 )	-1.09-1.68	0.3 ( 0.09 )	-1.76 ( -3.43 )
MYELODYSPLASTIC SYNDROME	2	NEOPLASMS BENIGN, MALIGNANT AND UNSPECIFIED (INCL CYSTS AND POLYPS)	0.83 ( 0.21 - 3.33 )	0.83 ( 0.07 )	-0.55-2.22	0.83 ( 0.26 )	-0.26 ( -1.93 )
VIRAL UPPER RESPIRATORY TRACT INFECTION	2	INFECTIONS AND INFESTATIONS	2.37 ( 0.59 - 9.49 )	2.37 ( 1.59 )	0.99-3.76	2.37 ( 0.74 )	1.25 ( -0.42 )
VAGINAL HAEMORRHAGE	2	REPRODUCTIVE SYSTEM AND BREAST DISORDERS	0.27 ( 0.07 - 1.09 )	0.27 ( 3.91 )	-1.11-1.66	0.27 ( 0.09 )	-1.88 ( -3.55 )
AGITATION	2	PSYCHIATRIC DISORDERS	0.16 ( 0.04 - 0.64 )	0.16 ( 8.88 )	-1.23-1.55	0.16 ( 0.05 )	-2.65 ( -4.32 )
ADVERSE EVENT	2	GENERAL DISORDERS AND ADMINISTRATION SITE CONDITIONS	0.13 ( 0.03 - 0.53 )	0.13 ( 11.24 )	-1.25-1.52	0.13 ( 0.04 )	-2.9 ( -4.57 )
HYPOALBUMINAEMIA	2	METABOLISM AND NUTRITION DISORDERS	1.64 ( 0.41 - 6.55 )	1.64 ( 0.5 )	0.25-3.02	1.64 ( 0.51 )	0.71 ( -0.95 )
CHOLECYSTITIS	2	HEPATOBILIARY DISORDERS	1.04 ( 0.26 - 4.18 )	1.04 ( 0 )	-0.34-2.43	1.04 ( 0.33 )	0.06 ( -1.6 )
ENDOCARDITIS	2	INFECTIONS AND INFESTATIONS	2.41 ( 0.6 - 9.64 )	2.41 ( 1.65 )	1.02-3.8	2.41 ( 0.76 )	1.27 ( -0.4 )
PYELONEPHRITIS ACUTE	2	INFECTIONS AND INFESTATIONS	6.2 ( 1.55 - 24.8 )	6.2 ( 8.7 )	4.81-7.58	6.19 ( 1.94 )	2.63 ( 0.96 )
TONSILLITIS	2	INFECTIONS AND INFESTATIONS	2.28 ( 0.57 - 9.13 )	2.28 ( 1.44 )	0.9-3.67	2.28 ( 0.72 )	1.19 ( -0.48 )
FACIAL PAIN	2	GENERAL DISORDERS AND ADMINISTRATION SITE CONDITIONS	1.39 ( 0.35 - 5.54 )	1.39 ( 0.21 )	0-2.77	1.39 ( 0.43 )	0.47 ( -1.2 )
DEAFNESS CONGENITAL	2	CONGENITAL, FAMILIAL AND GENETIC DISORDERS	65.81 ( 16.31 - 265.48 )	65.79 ( 126.02 )	64.4-67.19	64.98 ( 20.23 )	6.02 ( 4.34 )
ANAPHYLACTIC REACTION	2	IMMUNE SYSTEM DISORDERS	0.24 ( 0.06 - 0.95 )	0.24 ( 4.86 )	-1.15-1.62	0.24 ( 0.07 )	-2.07 ( -3.73 )
BLOOD PHOSPHORUS DECREASED	2	INVESTIGATIONS	3.41 ( 0.85 - 13.64 )	3.41 ( 3.4 )	2.02-4.79	3.41 ( 1.07 )	1.77 ( 0.1 )
IMMOBILE	2	SOCIAL CIRCUMSTANCES	2.83 ( 0.71 - 11.3 )	2.82 ( 2.36 )	1.44-4.21	2.82 ( 0.89 )	1.5 ( -0.17 )
VENOOCCLUSIVE LIVER DISEASE	2	HEPATOBILIARY DISORDERS	2.57 ( 0.64 - 10.27 )	2.57 ( 1.91 )	1.18-3.95	2.57 ( 0.8 )	1.36 ( -0.31 )
DERMATITIS ALLERGIC	2	SKIN AND SUBCUTANEOUS TISSUE DISORDERS	1.05 ( 0.26 - 4.22 )	1.05 ( 0.01 )	-0.33-2.44	1.05 ( 0.33 )	0.08 ( -1.59 )
CRANIOFACIAL FRACTURE	2	INJURY, POISONING AND PROCEDURAL COMPLICATIONS	2.72 ( 0.68 - 10.89 )	2.72 ( 2.18 )	1.34-4.11	2.72 ( 0.85 )	1.44 ( -0.22 )
BLOOD URIC ACID INCREASED	2	INVESTIGATIONS	2.16 ( 0.54 - 8.64 )	2.16 ( 1.25 )	0.77-3.55	2.16 ( 0.68 )	1.11 ( -0.56 )
OESOPHAGEAL DISORDER	2	GASTROINTESTINAL DISORDERS	3.07 ( 0.77 - 12.3 )	3.07 ( 2.8 )	1.69-4.46	3.07 ( 0.96 )	1.62 ( -0.05 )
PRE-ECLAMPSIA	2	PREGNANCY, PUERPERIUM AND PERINATAL CONDITIONS	2.59 ( 0.65 - 10.36 )	2.59 ( 1.95 )	1.2-3.98	2.59 ( 0.81 )	1.37 ( -0.29 )
TERATOGENICITY	2	CONGENITAL, FAMILIAL AND GENETIC DISORDERS	38.65 ( 9.62 - 155.37 )	38.65 ( 72.8 )	37.25-40.04	38.37 ( 11.98 )	5.26 ( 3.59 )
FUSARIUM INFECTION	2	INFECTIONS AND INFESTATIONS	20.11 ( 5.02 - 80.64 )	20.11 ( 36.17 )	18.72-21.5	20.03 ( 6.27 )	4.32 ( 2.65 )
PRODUCT ADMINISTERED TO PATIENT OF INAPPROPRIATE AGE	2	INJURY, POISONING AND PROCEDURAL COMPLICATIONS	0.93 ( 0.23 - 3.72 )	0.93 ( 0.01 )	-0.46-2.32	0.93 ( 0.29 )	-0.11 ( -1.77 )
SYSTEMIC LUPUS ERYTHEMATOSUS	2	MUSCULOSKELETAL AND CONNECTIVE TISSUE DISORDERS	0.4 ( 0.1 - 1.61 )	0.4 ( 1.78 )	-0.98-1.79	0.4 ( 0.13 )	-1.32 ( -2.98 )
AMYLASE INCREASED	2	INVESTIGATIONS	2.17 ( 0.54 - 8.67 )	2.17 ( 1.26 )	0.78-3.55	2.17 ( 0.68 )	1.12 ( -0.55 )
KLEBSIELLA INFECTION	2	INFECTIONS AND INFESTATIONS	2.56 ( 0.64 - 10.24 )	2.56 ( 1.9 )	1.17-3.95	2.56 ( 0.8 )	1.36 ( -0.31 )
ORTHOSTATIC HYPOTENSION	2	VASCULAR DISORDERS	0.69 ( 0.17 - 2.75 )	0.69 ( 0.28 )	-0.7-2.07	0.69 ( 0.22 )	-0.54 ( -2.21 )
NEPHROGENIC DIABETES INSIPIDUS	2	RENAL AND URINARY DISORDERS	10.48 ( 2.62 - 41.97 )	10.48 ( 17.12 )	9.09-11.87	10.46 ( 3.28 )	3.39 ( 1.72 )
ABDOMINAL COMPARTMENT SYNDROME	2	GASTROINTESTINAL DISORDERS	20.67 ( 5.15 - 82.89 )	20.67 ( 37.28 )	19.28-22.06	20.59 ( 6.44 )	4.36 ( 2.69 )
MEGACOLON	2	GASTROINTESTINAL DISORDERS	7.7 ( 1.92 - 30.83 )	7.7 ( 11.64 )	6.31-9.09	7.69 ( 2.41 )	2.94 ( 1.28 )
PARVOVIRUS B19 INFECTION	2	INFECTIONS AND INFESTATIONS	22.12 ( 5.52 - 88.73 )	22.12 ( 40.16 )	20.73-23.51	22.03 ( 6.89 )	4.46 ( 2.79 )
HAEMORRHAGE INTRACRANIAL	2	NERVOUS SYSTEM DISORDERS	0.76 ( 0.19 - 3.06 )	0.76 ( 0.14 )	-0.62-2.15	0.76 ( 0.24 )	-0.39 ( -2.05 )
CELL DEATH	2	METABOLISM AND NUTRITION DISORDERS	6.21 ( 1.55 - 24.84 )	6.21 ( 8.72 )	4.82-7.59	6.2 ( 1.94 )	2.63 ( 0.96 )
PANCREATIC FAILURE	2	GASTROINTESTINAL DISORDERS	8.21 ( 2.05 - 32.88 )	8.21 ( 12.65 )	6.82-9.6	8.2 ( 2.57 )	3.04 ( 1.37 )
CENTRAL NERVOUS SYSTEM LYMPHOMA	2	NEOPLASMS BENIGN, MALIGNANT AND UNSPECIFIED (INCL CYSTS AND POLYPS)	9.84 ( 2.46 - 39.39 )	9.83 ( 15.84 )	8.45-11.22	9.82 ( 3.08 )	3.3 ( 1.63 )
ACUTE MYOCARDIAL INFARCTION	2	CARDIAC DISORDERS	0.39 ( 0.1 - 1.56 )	0.39 ( 1.91 )	-1-1.78	0.39 ( 0.12 )	-1.36 ( -3.02 )
HICCUPS	2	RESPIRATORY, THORACIC AND MEDIASTINAL DISORDERS	1.55 ( 0.39 - 6.19 )	1.55 ( 0.39 )	0.16-2.93	1.55 ( 0.49 )	0.63 ( -1.04 )
CARNITINE DEFICIENCY	2	METABOLISM AND NUTRITION DISORDERS	75.89 ( 18.79 - 306.59 )	75.88 ( 145.66 )	74.48-77.28	74.8 ( 23.26 )	6.23 ( 4.54 )
ABDOMINAL DISTENSION	2	GASTROINTESTINAL DISORDERS	0.12 ( 0.03 - 0.48 )	0.12 ( 12.95 )	-1.27-1.51	0.12 ( 0.04 )	-3.06 ( -4.73 )
INFUSION RELATED REACTION	2	INJURY, POISONING AND PROCEDURAL COMPLICATIONS	0.2 ( 0.05 - 0.8 )	0.2 ( 6.45 )	-1.19-1.58	0.2 ( 0.06 )	-2.33 ( -4 )
MASS	2	GENERAL DISORDERS AND ADMINISTRATION SITE CONDITIONS	0.85 ( 0.21 - 3.4 )	0.85 ( 0.05 )	-0.54-2.24	0.85 ( 0.27 )	-0.23 ( -1.9 )
HEPATIC ENZYME ABNORMAL	2	INVESTIGATIONS	2.5 ( 0.62 - 10 )	2.5 ( 1.8 )	1.11-3.89	2.5 ( 0.78 )	1.32 ( -0.35 )
SCEDOSPORIUM INFECTION	2	INFECTIONS AND INFESTATIONS	21.57 ( 5.38 - 86.52 )	21.57 ( 39.07 )	20.18-22.96	21.48 ( 6.72 )	4.43 ( 2.75 )
STUPOR	2	NERVOUS SYSTEM DISORDERS	3.56 ( 0.89 - 14.25 )	3.56 ( 3.68 )	2.17-4.95	3.56 ( 1.12 )	1.83 ( 0.16 )
BRAIN ABSCESS	2	INFECTIONS AND INFESTATIONS	5.12 ( 1.28 - 20.49 )	5.12 ( 6.62 )	3.73-6.5	5.11 ( 1.6 )	2.35 ( 0.69 )
SEPTAL PANNICULITIS	2	SKIN AND SUBCUTANEOUS TISSUE DISORDERS	131.62 ( 32.34 - 535.6 )	131.59 ( 252.79 )	130.19-132.99	128.36 ( 39.67 )	7 ( 5.31 )
HEMIPARESIS	2	NERVOUS SYSTEM DISORDERS	0.68 ( 0.17 - 2.74 )	0.68 ( 0.29 )	-0.7-2.07	0.68 ( 0.21 )	-0.55 ( -2.21 )
ECTHYMA	2	INFECTIONS AND INFESTATIONS	33.76 ( 8.4 - 135.61 )	33.75 ( 63.15 )	32.36-35.14	33.54 ( 10.48 )	5.07 ( 3.39 )
DISABILITY	2	SOCIAL CIRCUMSTANCES	0.63 ( 0.16 - 2.5 )	0.63 ( 0.45 )	-0.76-2.01	0.63 ( 0.2 )	-0.68 ( -2.34 )
GASTRIC HAEMORRHAGE	2	GASTROINTESTINAL DISORDERS	0.99 ( 0.25 - 3.97 )	0.99 ( 0 )	-0.39-2.38	0.99 ( 0.31 )	-0.01 ( -1.68 )
INAPPROPRIATE ANTIDIURETIC HORMONE SECRETION	2	ENDOCRINE DISORDERS	1.25 ( 0.31 - 4.99 )	1.25 ( 0.1 )	-0.14-2.63	1.25 ( 0.39 )	0.32 ( -1.35 )
VENTRICULAR TACHYCARDIA	2	CARDIAC DISORDERS	0.73 ( 0.18 - 2.91 )	0.73 ( 0.21 )	-0.66-2.11	0.73 ( 0.23 )	-0.46 ( -2.13 )
HAEMORRHAGIC OVARIAN CYST	2	REPRODUCTIVE SYSTEM AND BREAST DISORDERS	20.35 ( 5.07 - 81.59 )	20.34 ( 36.64 )	18.96-21.73	20.27 ( 6.34 )	4.34 ( 2.67 )
NEUTROPHIL COUNT INCREASED	2	INVESTIGATIONS	1.16 ( 0.29 - 4.63 )	1.16 ( 0.04 )	-0.23-2.54	1.16 ( 0.36 )	0.21 ( -1.46 )
BOTULISM	2	INFECTIONS AND INFESTATIONS	26.87 ( 6.69 - 107.83 )	26.86 ( 49.54 )	25.47-28.25	26.73 ( 8.36 )	4.74 ( 3.07 )
BRAIN DEATH	2	GENERAL DISORDERS AND ADMINISTRATION SITE CONDITIONS	3.94 ( 0.99 - 15.78 )	3.94 ( 4.39 )	2.56-5.33	3.94 ( 1.23 )	1.98 ( 0.31 )
OBSTRUCTIVE AIRWAYS DISORDER	2	RESPIRATORY, THORACIC AND MEDIASTINAL DISORDERS	1.09 ( 0.27 - 4.34 )	1.09 ( 0.01 )	-0.3-2.47	1.09 ( 0.34 )	0.12 ( -1.55 )
BRAIN HERNIATION	2	INJURY, POISONING AND PROCEDURAL COMPLICATIONS	4.08 ( 1.02 - 16.33 )	4.08 ( 4.65 )	2.7-5.47	4.08 ( 1.28 )	2.03 ( 0.36 )
BREAST CANCER	2	NEOPLASMS BENIGN, MALIGNANT AND UNSPECIFIED (INCL CYSTS AND POLYPS)	0.12 ( 0.03 - 0.47 )	0.12 ( 13.28 )	-1.27-1.5	0.12 ( 0.04 )	-3.09 ( -4.76 )
CYTOMEGALOVIRUS TEST	2	INVESTIGATIONS	221.23 ( 53.73 - 910.9 )	221.18 ( 420.48 )	219.77-222.6	212.19 ( 64.93 )	7.73 ( 6.01 )
NEOPLASM PROGRESSION	2	NEOPLASMS BENIGN, MALIGNANT AND UNSPECIFIED (INCL CYSTS AND POLYPS)	0.33 ( 0.08 - 1.33 )	0.33 ( 2.67 )	-1.05-1.72	0.33 ( 0.1 )	-1.58 ( -3.25 )
POLLAKIURIA	2	RENAL AND URINARY DISORDERS	0.29 ( 0.07 - 1.17 )	0.29 ( 3.41 )	-1.09-1.68	0.29 ( 0.09 )	-1.77 ( -3.44 )
IRON DEFICIENCY ANAEMIA	2	BLOOD AND LYMPHATIC SYSTEM DISORDERS	1.33 ( 0.33 - 5.33 )	1.33 ( 0.17 )	-0.05-2.72	1.33 ( 0.42 )	0.42 ( -1.25 )
NECROTISING RETINITIS	2	EYE DISORDERS	19.8 ( 4.94 - 79.41 )	19.8 ( 35.57 )	18.41-21.19	19.73 ( 6.17 )	4.3 ( 2.63 )
PERICARDITIS	2	CARDIAC DISORDERS	0.88 ( 0.22 - 3.54 )	0.88 ( 0.03 )	-0.5-2.27	0.88 ( 0.28 )	-0.18 ( -1.84 )
INTRACRANIAL INFECTION	2	INFECTIONS AND INFESTATIONS	150.69 ( 36.94 - 614.76 )	150.66 ( 288.96 )	149.25-152.07	146.44 ( 45.16 )	7.19 ( 5.49 )
CYTOMEGALOVIRUS NEPHRITIS	2	INFECTIONS AND INFESTATIONS	236.31 ( 57.28 - 974.92 )	236.26 ( 448.16 )	234.85-237.68	226.03 ( 69.05 )	7.82 ( 6.1 )
CYTOMEGALOVIRUS GASTRITIS	2	INFECTIONS AND INFESTATIONS	61.16 ( 15.17 - 246.59 )	61.15 ( 116.96 )	59.76-62.54	60.45 ( 18.83 )	5.92 ( 4.24 )
MYOCARDITIS TOXOPLASMAL	2	INFECTIONS AND INFESTATIONS	742.69 ( 168.77 - 3268.3 )	742.54 ( 1295.95 )	741.06-744.02	649.85 ( 188.09 )	9.34 ( 7.54 )
SMOOTH MUSCLE CELL NEOPLASM	2	NEOPLASMS BENIGN, MALIGNANT AND UNSPECIFIED (INCL CYSTS AND POLYPS)	41.1 ( 10.22 - 165.25 )	41.09 ( 77.61 )	39.7-42.48	40.77 ( 12.73 )	5.35 ( 3.67 )
TOXOPLASMOSIS	2	INFECTIONS AND INFESTATIONS	11.54 ( 2.88 - 46.22 )	11.54 ( 19.21 )	10.15-12.93	11.51 ( 3.61 )	3.53 ( 1.86 )
ANKLE FRACTURE	2	INJURY, POISONING AND PROCEDURAL COMPLICATIONS	0.77 ( 0.19 - 3.09 )	0.77 ( 0.13 )	-0.61-2.16	0.77 ( 0.24 )	-0.37 ( -2.04 )
LOWER LIMB FRACTURE	2	INJURY, POISONING AND PROCEDURAL COMPLICATIONS	0.69 ( 0.17 - 2.74 )	0.69 ( 0.29 )	-0.7-2.07	0.69 ( 0.21 )	-0.55 ( -2.21 )
MYCOBACTERIAL INFECTION	2	INFECTIONS AND INFESTATIONS	7.13 ( 1.78 - 28.55 )	7.13 ( 10.53 )	5.74-8.52	7.12 ( 2.23 )	2.83 ( 1.16 )
PNEUMONIA STAPHYLOCOCCAL	2	INFECTIONS AND INFESTATIONS	6.04 ( 1.51 - 24.19 )	6.04 ( 8.41 )	4.66-7.43	6.04 ( 1.89 )	2.59 ( 0.93 )
PNEUMONIA PSEUDOMONAL	2	INFECTIONS AND INFESTATIONS	6.05 ( 1.51 - 24.22 )	6.05 ( 8.42 )	4.66-7.44	6.05 ( 1.89 )	2.6 ( 0.93 )
IRRITABILITY	2	PSYCHIATRIC DISORDERS	0.2 ( 0.05 - 0.78 )	0.2 ( 6.62 )	-1.19-1.58	0.2 ( 0.06 )	-2.35 ( -4.02 )
CUSHINGOID	2	ENDOCRINE DISORDERS	4.06 ( 1.01 - 16.24 )	4.06 ( 4.6 )	2.67-5.44	4.06 ( 1.27 )	2.02 ( 0.35 )
ABDOMINAL PAIN LOWER	2	GASTROINTESTINAL DISORDERS	0.47 ( 0.12 - 1.89 )	0.47 ( 1.18 )	-0.91-1.86	0.47 ( 0.15 )	-1.08 ( -2.75 )
HYPOPHAGIA	2	METABOLISM AND NUTRITION DISORDERS	0.44 ( 0.11 - 1.74 )	0.44 ( 1.46 )	-0.95-1.82	0.44 ( 0.14 )	-1.2 ( -2.86 )
APATHY	2	PSYCHIATRIC DISORDERS	0.85 ( 0.21 - 3.39 )	0.85 ( 0.05 )	-0.54-2.23	0.85 ( 0.27 )	-0.24 ( -1.9 )
BEHAVIOUR DISORDER	2	PSYCHIATRIC DISORDERS	2.73 ( 0.68 - 10.92 )	2.73 ( 2.19 )	1.34-4.11	2.73 ( 0.85 )	1.45 ( -0.22 )
DELUSION	2	PSYCHIATRIC DISORDERS	0.8 ( 0.2 - 3.19 )	0.8 ( 0.1 )	-0.59-2.18	0.8 ( 0.25 )	-0.32 ( -1.99 )
NEUROLEPTIC MALIGNANT SYNDROME	2	NERVOUS SYSTEM DISORDERS	1.02 ( 0.26 - 4.09 )	1.02 ( 0 )	-0.36-2.41	1.02 ( 0.32 )	0.03 ( -1.63 )
COGNITIVE DISORDER	2	NERVOUS SYSTEM DISORDERS	0.26 ( 0.07 - 1.05 )	0.26 ( 4.12 )	-1.12-1.65	0.26 ( 0.08 )	-1.92 ( -3.59 )
SYNCOPE	2	NERVOUS SYSTEM DISORDERS	0.12 ( 0.03 - 0.47 )	0.12 ( 13.11 )	-1.27-1.5	0.12 ( 0.04 )	-3.07 ( -4.74 )
HEPATITIS C	2	INFECTIONS AND INFESTATIONS	0.9 ( 0.23 - 3.61 )	0.9 ( 0.02 )	-0.48-2.29	0.9 ( 0.28 )	-0.15 ( -1.81 )
ABORTION SPONTANEOUS	2	PREGNANCY, PUERPERIUM AND PERINATAL CONDITIONS	0.3 ( 0.07 - 1.19 )	0.3 ( 3.34 )	-1.09-1.68	0.3 ( 0.09 )	-1.75 ( -3.42 )
B-CELL LYMPHOMA	2	NEOPLASMS BENIGN, MALIGNANT AND UNSPECIFIED (INCL CYSTS AND POLYPS)	3.45 ( 0.86 - 13.81 )	3.45 ( 3.48 )	2.07-4.84	3.45 ( 1.08 )	1.79 ( 0.12 )
HYPOTHERMIA	2	GENERAL DISORDERS AND ADMINISTRATION SITE CONDITIONS	1.21 ( 0.3 - 4.84 )	1.21 ( 0.07 )	-0.18-2.6	1.21 ( 0.38 )	0.27 ( -1.39 )
PHYSICAL DECONDITIONING	2	GENERAL DISORDERS AND ADMINISTRATION SITE CONDITIONS	7.36 ( 1.84 - 29.48 )	7.36 ( 10.98 )	5.98-8.75	7.35 ( 2.3 )	2.88 ( 1.21 )
ORAL FUNGAL INFECTION	2	INFECTIONS AND INFESTATIONS	4.38 ( 1.09 - 17.53 )	4.38 ( 5.21 )	2.99-5.77	4.38 ( 1.37 )	2.13 ( 0.46 )
ESCHERICHIA SEPSIS	2	INFECTIONS AND INFESTATIONS	4.15 ( 1.04 - 16.6 )	4.15 ( 4.78 )	2.76-5.53	4.15 ( 1.3 )	2.05 ( 0.38 )
CAMPYLOBACTER INFECTION	2	INFECTIONS AND INFESTATIONS	16.02 ( 4 - 64.21 )	16.02 ( 28.07 )	14.63-17.41	15.97 ( 5 )	4 ( 2.33 )
BRAIN INJURY	2	NERVOUS SYSTEM DISORDERS	1.15 ( 0.29 - 4.62 )	1.15 ( 0.04 )	-0.23-2.54	1.15 ( 0.36 )	0.21 ( -1.46 )
MENINGITIS ASEPTIC	2	INFECTIONS AND INFESTATIONS	2.87 ( 0.72 - 11.49 )	2.87 ( 2.44 )	1.49-4.26	2.87 ( 0.9 )	1.52 ( -0.15 )
CAMPYLOBACTER GASTROENTERITIS	2	INFECTIONS AND INFESTATIONS	20.55 ( 5.12 - 82.4 )	20.54 ( 37.04 )	19.16-21.93	20.47 ( 6.4 )	4.36 ( 2.68 )
ENTEROVIRUS INFECTION	2	INFECTIONS AND INFESTATIONS	16.27 ( 4.06 - 65.21 )	16.27 ( 28.57 )	14.88-17.66	16.22 ( 5.08 )	4.02 ( 2.35 )
HELICOBACTER INFECTION	2	INFECTIONS AND INFESTATIONS	1.55 ( 0.39 - 6.2 )	1.55 ( 0.39 )	0.16-2.94	1.55 ( 0.49 )	0.63 ( -1.03 )
LARGE INTESTINE INFECTION	2	INFECTIONS AND INFESTATIONS	8.03 ( 2.01 - 32.14 )	8.03 ( 12.29 )	6.64-9.41	8.02 ( 2.51 )	3 ( 1.33 )
STRONGYLOIDIASIS	2	INFECTIONS AND INFESTATIONS	7.78 ( 1.94 - 31.16 )	7.78 ( 11.8 )	6.39-9.17	7.77 ( 2.43 )	2.96 ( 1.29 )
HYPERTHERMIA	2	GENERAL DISORDERS AND ADMINISTRATION SITE CONDITIONS	1.58 ( 0.4 - 6.33 )	1.58 ( 0.43 )	0.2-2.97	1.58 ( 0.5 )	0.66 ( -1 )
CARDIAC OPERATION	2	SURGICAL AND MEDICAL PROCEDURES	1.53 ( 0.38 - 6.12 )	1.53 ( 0.37 )	0.14-2.91	1.53 ( 0.48 )	0.61 ( -1.05 )
ENTEROCOLITIS HAEMORRHAGIC	2	GASTROINTESTINAL DISORDERS	7.71 ( 1.93 - 30.88 )	7.71 ( 11.67 )	6.33-9.1	7.7 ( 2.41 )	2.95 ( 1.28 )
DISSEMINATED CYTOMEGALOVIRAL INFECTION	2	INFECTIONS AND INFESTATIONS	58.41 ( 14.49 - 235.42 )	58.4 ( 111.58 )	57.01-59.8	57.76 ( 18 )	5.85 ( 4.17 )
PERICARDITIS CONSTRICTIVE	2	CARDIAC DISORDERS	32.8 ( 8.17 - 131.74 )	32.79 ( 61.26 )	31.4-34.18	32.59 ( 10.18 )	5.03 ( 3.35 )
VIRAL SEPSIS	2	INFECTIONS AND INFESTATIONS	99.02 ( 24.44 - 401.25 )	99.01 ( 190.4 )	97.61-100.4	97.17 ( 30.14 )	6.6 ( 4.91 )
DRUG LEVEL INCREASED	2	INVESTIGATIONS	0.73 ( 0.18 - 2.92 )	0.73 ( 0.2 )	-0.65-2.12	0.73 ( 0.23 )	-0.45 ( -2.12 )
HEPATITIS CHOLESTATIC	2	HEPATOBILIARY DISORDERS	2.11 ( 0.53 - 8.43 )	2.11 ( 1.16 )	0.72-3.49	2.11 ( 0.66 )	1.08 ( -0.59 )
INTERNAL HAEMORRHAGE	2	VASCULAR DISORDERS	1.05 ( 0.26 - 4.19 )	1.05 ( 0 )	-0.34-2.43	1.05 ( 0.33 )	0.07 ( -1.6 )
PRODUCT PRESCRIBING ISSUE	2	INJURY, POISONING AND PROCEDURAL COMPLICATIONS	1.02 ( 0.26 - 4.09 )	1.02 ( 0 )	-0.36-2.41	1.02 ( 0.32 )	0.03 ( -1.63 )
CEREBRAL ASPERGILLOSIS	2	INFECTIONS AND INFESTATIONS	20.88 ( 5.21 - 83.73 )	20.87 ( 37.69 )	19.49-22.26	20.8 ( 6.51 )	4.38 ( 2.71 )
VASCULITIS	2	VASCULAR DISORDERS	1.06 ( 0.26 - 4.23 )	1.06 ( 0.01 )	-0.33-2.44	1.06 ( 0.33 )	0.08 ( -1.59 )
AZOOSPERMIA	2	REPRODUCTIVE SYSTEM AND BREAST DISORDERS	28.64 ( 7.14 - 114.99 )	28.64 ( 53.05 )	27.25-30.03	28.49 ( 8.9 )	4.83 ( 3.16 )
INFECTED SKIN ULCER	2	INFECTIONS AND INFESTATIONS	6.16 ( 1.54 - 24.65 )	6.16 ( 8.63 )	4.77-7.55	6.15 ( 1.93 )	2.62 ( 0.95 )
PNEUMOCYSTIS JIROVECII INFECTION	2	INFECTIONS AND INFESTATIONS	9.32 ( 2.33 - 37.3 )	9.32 ( 14.82 )	7.93-10.7	9.3 ( 2.91 )	3.22 ( 1.55 )
SKIN ULCER	2	SKIN AND SUBCUTANEOUS TISSUE DISORDERS	0.47 ( 0.12 - 1.87 )	0.47 ( 1.21 )	-0.92-1.85	0.47 ( 0.15 )	-1.1 ( -2.76 )
BLINDNESS UNILATERAL	2	EYE DISORDERS	0.88 ( 0.22 - 3.5 )	0.88 ( 0.04 )	-0.51-2.26	0.88 ( 0.27 )	-0.19 ( -1.86 )
GRAFT LOSS	2	INJURY, POISONING AND PROCEDURAL COMPLICATIONS	16.1 ( 4.02 - 64.5 )	16.09 ( 28.22 )	14.7-17.48	16.05 ( 5.02 )	4 ( 2.33 )
PRODUCT DISPENSING ERROR	2	INJURY, POISONING AND PROCEDURAL COMPLICATIONS	0.34 ( 0.08 - 1.35 )	0.34 ( 2.61 )	-1.05-1.72	0.34 ( 0.11 )	-1.57 ( -3.23 )
GASTRIC ULCER	2	GASTROINTESTINAL DISORDERS	0.62 ( 0.16 - 2.49 )	0.62 ( 0.46 )	-0.76-2.01	0.62 ( 0.2 )	-0.68 ( -2.35 )
ADENOVIRUS INFECTION	2	INFECTIONS AND INFESTATIONS	4.59 ( 1.15 - 18.36 )	4.59 ( 5.61 )	3.2-5.97	4.58 ( 1.44 )	2.2 ( 0.53 )
BOWEN'S DISEASE	2	NEOPLASMS BENIGN, MALIGNANT AND UNSPECIFIED (INCL CYSTS AND POLYPS)	9.99 ( 2.49 - 40 )	9.99 ( 16.14 )	8.6-11.37	9.97 ( 3.12 )	3.32 ( 1.65 )
AORTIC VALVE INCOMPETENCE	2	CARDIAC DISORDERS	2.78 ( 0.7 - 11.13 )	2.78 ( 2.28 )	1.4-4.17	2.78 ( 0.87 )	1.48 ( -0.19 )
SARS-COV-2 ANTIBODY TEST POSITIVE	2	INVESTIGATIONS	43.14 ( 10.73 - 173.53 )	43.14 ( 81.64 )	41.74-44.53	42.79 ( 13.35 )	5.42 ( 3.74 )
BLOOD CHOLESTEROL INCREASED	2	INVESTIGATIONS	0.27 ( 0.07 - 1.06 )	0.27 ( 4.05 )	-1.12-1.65	0.27 ( 0.08 )	-1.91 ( -3.58 )
AORTIC ANEURYSM	2	VASCULAR DISORDERS	1.52 ( 0.38 - 6.1 )	1.52 ( 0.36 )	0.14-2.91	1.52 ( 0.48 )	0.61 ( -1.06 )
OSTEOMYELITIS CHRONIC	2	INFECTIONS AND INFESTATIONS	19.01 ( 4.74 - 76.21 )	19 ( 33.99 )	17.62-20.39	18.94 ( 5.93 )	4.24 ( 2.57 )
SPEECH DISORDER	2	NERVOUS SYSTEM DISORDERS	0.23 ( 0.06 - 0.91 )	0.23 ( 5.23 )	-1.16-1.61	0.23 ( 0.07 )	-2.13 ( -3.8 )
HEAD INJURY	2	INJURY, POISONING AND PROCEDURAL COMPLICATIONS	0.39 ( 0.1 - 1.56 )	0.39 ( 1.91 )	-1-1.78	0.39 ( 0.12 )	-1.36 ( -3.02 )
EPSTEIN-BARR VIRUS ASSOCIATED LYMPHOPROLIFERATIVE DISORDER	2	NEOPLASMS BENIGN, MALIGNANT AND UNSPECIFIED (INCL CYSTS AND POLYPS)	7.46 ( 1.86 - 29.88 )	7.46 ( 11.18 )	6.08-8.85	7.45 ( 2.34 )	2.9 ( 1.23 )
CARDIOMYOPATHY	2	CARDIAC DISORDERS	0.81 ( 0.2 - 3.23 )	0.81 ( 0.09 )	-0.58-2.19	0.81 ( 0.25 )	-0.31 ( -1.97 )
AMERICAN TRYPANOSOMIASIS	2	INFECTIONS AND INFESTATIONS	53.32 ( 13.24 - 214.75 )	53.31 ( 101.62 )	51.92-54.7	52.78 ( 16.45 )	5.72 ( 4.04 )
LOW BIRTH WEIGHT BABY	2	PREGNANCY, PUERPERIUM AND PERINATAL CONDITIONS	1.54 ( 0.38 - 6.15 )	1.54 ( 0.38 )	0.15-2.92	1.54 ( 0.48 )	0.62 ( -1.05 )
VASCULAR ANASTOMOTIC HAEMORRHAGE	2	INJURY, POISONING AND PROCEDURAL COMPLICATIONS	385.1 ( 91.56 - 1619.66 )	385.02 ( 713.22 )	383.58-386.46	358.54 ( 107.78 )	8.49 ( 6.74 )
INTERVERTEBRAL DISC SPACE NARROWING	2	MUSCULOSKELETAL AND CONNECTIVE TISSUE DISORDERS	13.84 ( 3.46 - 55.47 )	13.84 ( 23.77 )	12.45-15.23	13.81 ( 4.32 )	3.79 ( 2.12 )
PERINEAL CYST	2	REPRODUCTIVE SYSTEM AND BREAST DISORDERS	196.18 ( 47.8 - 805.14 )	196.14 ( 374.18 )	194.73-197.55	189.05 ( 58.01 )	7.56 ( 5.85 )
ABDOMINAL WALL HAEMORRHAGE	2	GASTROINTESTINAL DISORDERS	47.26 ( 11.74 - 190.2 )	47.25 ( 89.73 )	45.86-48.64	46.84 ( 14.61 )	5.55 ( 3.87 )
ATRIOVENTRICULAR BLOCK FIRST DEGREE	2	CARDIAC DISORDERS	2.61 ( 0.65 - 10.42 )	2.6 ( 1.98 )	1.22-3.99	2.6 ( 0.82 )	1.38 ( -0.29 )
PRODUCT NAME CONFUSION	2	INJURY, POISONING AND PROCEDURAL COMPLICATIONS	9.08 ( 2.27 - 36.36 )	9.08 ( 14.35 )	7.69-10.47	9.06 ( 2.84 )	3.18 ( 1.51 )
NORMAL NEWBORN	2	PREGNANCY, PUERPERIUM AND PERINATAL CONDITIONS	2.25 ( 0.56 - 8.99 )	2.25 ( 1.39 )	0.86-3.63	2.25 ( 0.7 )	1.17 ( -0.5 )
MARROW HYPERPLASIA	2	NEOPLASMS BENIGN, MALIGNANT AND UNSPECIFIED (INCL CYSTS AND POLYPS)	16.66 ( 4.16 - 66.78 )	16.66 ( 29.35 )	15.27-18.05	16.61 ( 5.2 )	4.05 ( 2.38 )
LUNG NEOPLASM MALIGNANT	2	NEOPLASMS BENIGN, MALIGNANT AND UNSPECIFIED (INCL CYSTS AND POLYPS)	0.28 ( 0.07 - 1.12 )	0.28 ( 3.73 )	-1.11-1.66	0.28 ( 0.09 )	-1.84 ( -3.51 )
GASTRIC PERFORATION	2	GASTROINTESTINAL DISORDERS	4.65 ( 1.16 - 18.6 )	4.65 ( 5.72 )	3.26-6.03	4.64 ( 1.46 )	2.22 ( 0.55 )
PARAINFLUENZAE VIRUS INFECTION	2	INFECTIONS AND INFESTATIONS	8.21 ( 2.05 - 32.85 )	8.2 ( 12.63 )	6.82-9.59	8.19 ( 2.57 )	3.03 ( 1.37 )
BRONCHOPLEURAL FISTULA	2	RESPIRATORY, THORACIC AND MEDIASTINAL DISORDERS	35.37 ( 8.8 - 142.1 )	35.36 ( 66.32 )	33.97-36.75	35.13 ( 10.97 )	5.13 ( 3.46 )
LIP NEOPLASM	2	NEOPLASMS BENIGN, MALIGNANT AND UNSPECIFIED (INCL CYSTS AND POLYPS)	182.41 ( 44.53 - 747.29 )	182.38 ( 348.54 )	180.97-183.79	176.23 ( 54.15 )	7.46 ( 5.75 )
PROCTOCOLECTOMY	2	SURGICAL AND MEDICAL PROCEDURES	45.8 ( 11.38 - 184.29 )	45.8 ( 86.87 )	44.4-47.19	45.4 ( 14.16 )	5.5 ( 3.83 )
ANAEMIA MACROCYTIC	2	BLOOD AND LYMPHATIC SYSTEM DISORDERS	5.67 ( 1.42 - 22.69 )	5.67 ( 7.68 )	4.28-7.05	5.66 ( 1.77 )	2.5 ( 0.83 )
ERYTHROPHAGOCYTOSIS	2	BLOOD AND LYMPHATIC SYSTEM DISORDERS	547.24 ( 127.45 - 2349.77 )	547.13 ( 986.44 )	545.68-548.59	495.12 ( 146.28 )	8.95 ( 7.18 )
INJECTION SITE HAEMATOMA	2	GENERAL DISORDERS AND ADMINISTRATION SITE CONDITIONS	0.75 ( 0.19 - 2.98 )	0.75 ( 0.17 )	-0.64-2.13	0.75 ( 0.23 )	-0.42 ( -2.09 )
ORGANISING PNEUMONIA	2	RESPIRATORY, THORACIC AND MEDIASTINAL DISORDERS	2.49 ( 0.62 - 9.97 )	2.49 ( 1.79 )	1.11-3.88	2.49 ( 0.78 )	1.32 ( -0.35 )
TUMOUR LYSIS SYNDROME	2	METABOLISM AND NUTRITION DISORDERS	1.47 ( 0.37 - 5.89 )	1.47 ( 0.3 )	0.09-2.86	1.47 ( 0.46 )	0.56 ( -1.11 )
CUTANEOUS VASCULITIS	2	SKIN AND SUBCUTANEOUS TISSUE DISORDERS	2.68 ( 0.67 - 10.72 )	2.68 ( 2.11 )	1.29-4.07	2.68 ( 0.84 )	1.42 ( -0.25 )
ASPERGILLUS TEST POSITIVE	2	INVESTIGATIONS	39.38 ( 9.8 - 158.33 )	39.38 ( 74.24 )	37.99-40.77	39.09 ( 12.2 )	5.29 ( 3.61 )
ATELECTASIS	2	RESPIRATORY, THORACIC AND MEDIASTINAL DISORDERS	1.2 ( 0.3 - 4.8 )	1.2 ( 0.07 )	-0.19-2.59	1.2 ( 0.38 )	0.26 ( -1.4 )
PYELONEPHRITIS	2	INFECTIONS AND INFESTATIONS	1.43 ( 0.36 - 5.73 )	1.43 ( 0.26 )	0.05-2.82	1.43 ( 0.45 )	0.52 ( -1.15 )
OESOPHAGEAL CANDIDIASIS	2	INFECTIONS AND INFESTATIONS	3.25 ( 0.81 - 12.99 )	3.25 ( 3.11 )	1.86-4.63	3.25 ( 1.02 )	1.7 ( 0.03 )
CONGENITAL DYSKERATOSIS	2	CONGENITAL, FAMILIAL AND GENETIC DISORDERS	742.69 ( 168.77 - 3268.3 )	742.54 ( 1295.95 )	741.06-744.02	649.85 ( 188.09 )	9.34 ( 7.54 )
COOMBS POSITIVE HAEMOLYTIC ANAEMIA	2	BLOOD AND LYMPHATIC SYSTEM DISORDERS	25.05 ( 6.24 - 100.53 )	25.05 ( 45.96 )	23.66-26.44	24.93 ( 7.8 )	4.64 ( 2.97 )
EMPHYSEMA	2	RESPIRATORY, THORACIC AND MEDIASTINAL DISORDERS	1.16 ( 0.29 - 4.65 )	1.16 ( 0.05 )	-0.22-2.55	1.16 ( 0.36 )	0.22 ( -1.45 )
TONGUE NEOPLASM MALIGNANT STAGE UNSPECIFIED	2	NEOPLASMS BENIGN, MALIGNANT AND UNSPECIFIED (INCL CYSTS AND POLYPS)	6.88 ( 1.72 - 27.53 )	6.88 ( 10.03 )	5.49-8.26	6.87 ( 2.15 )	2.78 ( 1.11 )
GENOTYPE DRUG RESISTANCE TEST POSITIVE	2	INVESTIGATIONS	10.49 ( 2.62 - 42.02 )	10.49 ( 17.14 )	9.1-11.88	10.47 ( 3.28 )	3.39 ( 1.72 )
PSYCHOMOTOR SKILLS IMPAIRED	2	NERVOUS SYSTEM DISORDERS	4.42 ( 1.11 - 17.7 )	4.42 ( 5.3 )	3.04-5.81	4.42 ( 1.39 )	2.14 ( 0.48 )
TRACHEOBRONCHITIS	2	INFECTIONS AND INFESTATIONS	15.66 ( 3.91 - 62.75 )	15.66 ( 27.36 )	14.27-17.04	15.61 ( 4.89 )	3.96 ( 2.29 )
TRICHODYSPLASIA SPINULOSA	2	SKIN AND SUBCUTANEOUS TISSUE DISORDERS	33.22 ( 8.27 - 133.43 )	33.21 ( 62.09 )	31.82-34.6	33.01 ( 10.31 )	5.04 ( 3.37 )
BONE MARROW DISORDER	2	BLOOD AND LYMPHATIC SYSTEM DISORDERS	4.14 ( 1.03 - 16.55 )	4.14 ( 4.75 )	2.75-5.52	4.13 ( 1.3 )	2.05 ( 0.38 )
BLOOD UREA INCREASED	2	INVESTIGATIONS	0.68 ( 0.17 - 2.7 )	0.68 ( 0.31 )	-0.71-2.06	0.68 ( 0.21 )	-0.56 ( -2.23 )
TOXIC EPIDERMAL NECROLYSIS	2	SKIN AND SUBCUTANEOUS TISSUE DISORDERS	0.83 ( 0.21 - 3.3 )	0.83 ( 0.07 )	-0.56-2.21	0.83 ( 0.26 )	-0.28 ( -1.94 )
MENINGITIS CRYPTOCOCCAL	2	INFECTIONS AND INFESTATIONS	7.83 ( 1.96 - 31.34 )	7.83 ( 11.89 )	6.44-9.21	7.82 ( 2.45 )	2.97 ( 1.3 )
BILIARY ANASTOMOSIS COMPLICATION	2	INJURY, POISONING AND PROCEDURAL COMPLICATIONS	91.21 ( 22.53 - 369.19 )	91.19 ( 175.32 )	89.79-92.59	89.63 ( 27.82 )	6.49 ( 4.8 )
PULMONARY HAEMORRHAGE	2	RESPIRATORY, THORACIC AND MEDIASTINAL DISORDERS	1.49 ( 0.37 - 5.95 )	1.49 ( 0.32 )	0.1-2.87	1.49 ( 0.47 )	0.57 ( -1.09 )
EAR INFECTION	1	INFECTIONS AND INFESTATIONS	0.24 ( 0.03 - 1.72 )	0.24 ( 2.37 )	-1.72-2.2	0.24 ( 0.05 )	-2.04 ( -3.71 )
GROWTH RETARDATION	1	MUSCULOSKELETAL AND CONNECTIVE TISSUE DISORDERS	2.04 ( 0.29 - 14.51 )	2.04 ( 0.53 )	0.08-4	2.04 ( 0.4 )	1.03 ( -0.64 )
NEURALGIA	1	NERVOUS SYSTEM DISORDERS	0.25 ( 0.04 - 1.81 )	0.25 ( 2.18 )	-1.71-2.21	0.25 ( 0.05 )	-1.97 ( -3.64 )
CYTOKINE STORM	1	IMMUNE SYSTEM DISORDERS	10.05 ( 1.41 - 71.52 )	10.05 ( 8.14 )	8.09-12.02	10.04 ( 1.94 )	3.33 ( 1.66 )
PULSELESS ELECTRICAL ACTIVITY	1	CARDIAC DISORDERS	1.23 ( 0.17 - 8.76 )	1.23 ( 0.04 )	-0.73-3.19	1.23 ( 0.24 )	0.3 ( -1.36 )
VASCULAR BYPASS DYSFUNCTION	1	INJURY, POISONING AND PROCEDURAL COMPLICATIONS	94.51 ( 13.08 - 683.06 )	94.51 ( 90.86 )	92.53-96.48	92.84 ( 17.74 )	6.54 ( 4.83 )
CORONARY ARTERY DISEASE	1	CARDIAC DISORDERS	0.18 ( 0.03 - 1.27 )	0.18 ( 3.76 )	-1.78-2.14	0.18 ( 0.03 )	-2.48 ( -4.14 )
IMMUNOSUPPRESSANT DRUG LEVEL DECREASED	1	INVESTIGATIONS	5.07 ( 0.71 - 36.01 )	5.07 ( 3.26 )	3.11-7.03	5.06 ( 0.98 )	2.34 ( 0.67 )
POLYMYALGIA RHEUMATICA	1	MUSCULOSKELETAL AND CONNECTIVE TISSUE DISORDERS	2.21 ( 0.31 - 15.72 )	2.21 ( 0.66 )	0.25-4.17	2.21 ( 0.43 )	1.15 ( -0.52 )
KERATITIS	1	EYE DISORDERS	2.13 ( 0.3 - 15.13 )	2.13 ( 0.6 )	0.17-4.09	2.13 ( 0.41 )	1.09 ( -0.58 )
HYPERTHYROIDISM	1	ENDOCRINE DISORDERS	0.44 ( 0.06 - 3.1 )	0.44 ( 0.73 )	-1.52-2.4	0.44 ( 0.08 )	-1.2 ( -2.86 )
IMPAIRED HEALING	1	GENERAL DISORDERS AND ADMINISTRATION SITE CONDITIONS	0.19 ( 0.03 - 1.37 )	0.19 ( 3.39 )	-1.77-2.15	0.19 ( 0.04 )	-2.38 ( -4.04 )
SKIN HYPERTROPHY	1	SKIN AND SUBCUTANEOUS TISSUE DISORDERS	2.17 ( 0.31 - 15.39 )	2.17 ( 0.63 )	0.21-4.13	2.17 ( 0.42 )	1.12 ( -0.55 )
DELIRIUM	1	PSYCHIATRIC DISORDERS	0.18 ( 0.03 - 1.3 )	0.18 ( 3.66 )	-1.78-2.14	0.18 ( 0.04 )	-2.45 ( -4.12 )
CLOSTRIDIUM COLITIS	1	INFECTIONS AND INFESTATIONS	4.54 ( 0.64 - 32.29 )	4.54 ( 2.76 )	2.58-6.5	4.54 ( 0.88 )	2.18 ( 0.51 )
MOOD SWINGS	1	PSYCHIATRIC DISORDERS	0.18 ( 0.03 - 1.31 )	0.18 ( 3.61 )	-1.78-2.14	0.18 ( 0.04 )	-2.44 ( -4.1 )
SUBDURAL HAEMATOMA	1	INJURY, POISONING AND PROCEDURAL COMPLICATIONS	0.41 ( 0.06 - 2.91 )	0.41 ( 0.85 )	-1.55-2.37	0.41 ( 0.08 )	-1.29 ( -2.95 )
ABDOMINAL INFECTION	1	INFECTIONS AND INFESTATIONS	2.45 ( 0.35 - 17.43 )	2.45 ( 0.86 )	0.49-4.41	2.45 ( 0.48 )	1.29 ( -0.37 )
ENTEROBACTER INFECTION	1	INFECTIONS AND INFESTATIONS	3.74 ( 0.53 - 26.55 )	3.74 ( 2 )	1.78-5.7	3.73 ( 0.72 )	1.9 ( 0.23 )
HABITUAL ABORTION	1	PREGNANCY, PUERPERIUM AND PERINATAL CONDITIONS	69.31 ( 9.64 - 498.56 )	69.3 ( 66.43 )	67.33-71.28	68.4 ( 13.12 )	6.1 ( 4.4 )
MENINGOENCEPHALITIS HERPETIC	1	INFECTIONS AND INFESTATIONS	6.39 ( 0.9 - 45.4 )	6.39 ( 4.54 )	4.42-8.35	6.38 ( 1.24 )	2.67 ( 1 )
ADENOCARCINOMA	1	NEOPLASMS BENIGN, MALIGNANT AND UNSPECIFIED (INCL CYSTS AND POLYPS)	2.6 ( 0.37 - 18.44 )	2.6 ( 0.98 )	0.64-4.56	2.6 ( 0.5 )	1.38 ( -0.29 )
BEZOAR	1	GASTROINTESTINAL DISORDERS	5.29 ( 0.74 - 37.62 )	5.29 ( 3.48 )	3.33-7.25	5.29 ( 1.02 )	2.4 ( 0.73 )
NERVE INJURY	1	INJURY, POISONING AND PROCEDURAL COMPLICATIONS	0.53 ( 0.07 - 3.75 )	0.53 ( 0.42 )	-1.43-2.49	0.53 ( 0.1 )	-0.92 ( -2.59 )
PERONEAL NERVE PALSY	1	NERVOUS SYSTEM DISORDERS	1.04 ( 0.15 - 7.37 )	1.04 ( 0 )	-0.92-3	1.04 ( 0.2 )	0.05 ( -1.61 )
AZOTAEMIA	1	RENAL AND URINARY DISORDERS	1.57 ( 0.22 - 11.18 )	1.57 ( 0.21 )	-0.39-3.53	1.57 ( 0.31 )	0.65 ( -1.01 )
GENERAL SYMPTOM	1	GENERAL DISORDERS AND ADMINISTRATION SITE CONDITIONS	0.78 ( 0.11 - 5.53 )	0.78 ( 0.06 )	-1.18-2.74	0.78 ( 0.15 )	-0.36 ( -2.03 )
PRODUCT ODOUR ABNORMAL	1	PRODUCT ISSUES	0.64 ( 0.09 - 4.57 )	0.64 ( 0.2 )	-1.32-2.6	0.64 ( 0.12 )	-0.63 ( -2.3 )
NEUTROPENIC INFECTION	1	INFECTIONS AND INFESTATIONS	5.96 ( 0.84 - 42.37 )	5.96 ( 4.12 )	4-7.92	5.96 ( 1.15 )	2.57 ( 0.91 )
INTESTINAL ANASTOMOSIS COMPLICATION	1	INJURY, POISONING AND PROCEDURAL COMPLICATIONS	24.07 ( 3.37 - 171.65 )	24.06 ( 22 )	22.1-26.03	23.96 ( 4.63 )	4.58 ( 2.9 )
EPILEPSY	1	NERVOUS SYSTEM DISORDERS	0.21 ( 0.03 - 1.48 )	0.21 ( 2.99 )	-1.75-2.17	0.21 ( 0.04 )	-2.26 ( -3.92 )
OTITIS MEDIA	1	INFECTIONS AND INFESTATIONS	1.8 ( 0.25 - 12.75 )	1.8 ( 0.35 )	-0.16-3.76	1.8 ( 0.35 )	0.84 ( -0.82 )
RENAL HAEMATOMA	1	RENAL AND URINARY DISORDERS	11.35 ( 1.6 - 80.76 )	11.35 ( 9.42 )	9.39-13.31	11.33 ( 2.19 )	3.5 ( 1.83 )
BILIRUBIN CONJUGATED INCREASED	1	INVESTIGATIONS	2.57 ( 0.36 - 18.25 )	2.57 ( 0.96 )	0.61-4.53	2.57 ( 0.5 )	1.36 ( -0.31 )
PIGMENTATION DISORDER	1	SKIN AND SUBCUTANEOUS TISSUE DISORDERS	1 ( 0.14 - 7.11 )	1 ( 0 )	-0.96-2.96	1 ( 0.19 )	0 ( -1.66 )
MITOCHONDRIAL TOXICITY	1	METABOLISM AND NUTRITION DISORDERS	7.08 ( 1 - 50.35 )	7.08 ( 5.22 )	5.12-9.04	7.07 ( 1.37 )	2.82 ( 1.15 )
CATHETER SITE RELATED REACTION	1	GENERAL DISORDERS AND ADMINISTRATION SITE CONDITIONS	9.35 ( 1.31 - 66.5 )	9.35 ( 7.44 )	7.39-11.31	9.33 ( 1.81 )	3.22 ( 1.55 )
DYSTONIA	1	NERVOUS SYSTEM DISORDERS	0.3 ( 0.04 - 2.11 )	0.3 ( 1.67 )	-1.66-2.26	0.3 ( 0.06 )	-1.75 ( -3.42 )
KLEBSIELLA SEPSIS	1	INFECTIONS AND INFESTATIONS	5.51 ( 0.77 - 39.14 )	5.51 ( 3.68 )	3.55-7.47	5.5 ( 1.07 )	2.46 ( 0.79 )
MUSCULOSKELETAL CHEST PAIN	1	MUSCULOSKELETAL AND CONNECTIVE TISSUE DISORDERS	0.38 ( 0.05 - 2.71 )	0.38 ( 1 )	-1.58-2.34	0.38 ( 0.07 )	-1.39 ( -3.06 )
OPTIC NERVE INJURY	1	INJURY, POISONING AND PROCEDURAL COMPLICATIONS	5.45 ( 0.77 - 38.73 )	5.45 ( 3.63 )	3.49-7.41	5.44 ( 1.05 )	2.44 ( 0.78 )
POOR VENOUS ACCESS	1	VASCULAR DISORDERS	0.62 ( 0.09 - 4.38 )	0.62 ( 0.24 )	-1.34-2.58	0.62 ( 0.12 )	-0.7 ( -2.36 )
TRANSIENT ISCHAEMIC ATTACK	1	NERVOUS SYSTEM DISORDERS	0.17 ( 0.02 - 1.23 )	0.17 ( 3.96 )	-1.79-2.13	0.17 ( 0.03 )	-2.53 ( -4.2 )
MIXED LIVER INJURY	1	HEPATOBILIARY DISORDERS	2.69 ( 0.38 - 19.08 )	2.69 ( 1.06 )	0.73-4.65	2.69 ( 0.52 )	1.43 ( -0.24 )
LOGORRHOEA	1	PSYCHIATRIC DISORDERS	1.64 ( 0.23 - 11.65 )	1.64 ( 0.25 )	-0.32-3.6	1.64 ( 0.32 )	0.71 ( -0.95 )
MANIA	1	PSYCHIATRIC DISORDERS	0.37 ( 0.05 - 2.59 )	0.37 ( 1.1 )	-1.59-2.33	0.37 ( 0.07 )	-1.45 ( -3.12 )
VIRAL LOAD	1	INVESTIGATIONS	36.1 ( 5.05 - 258.05 )	36.1 ( 33.89 )	34.13-38.06	35.85 ( 6.91 )	5.16 ( 3.48 )
PNEUMONIA MYCOPLASMAL	1	INFECTIONS AND INFESTATIONS	7.95 ( 1.12 - 56.52 )	7.95 ( 6.06 )	5.99-9.91	7.94 ( 1.54 )	2.99 ( 1.32 )
HYPERACTIVE PHARYNGEAL REFLEX	1	RESPIRATORY, THORACIC AND MEDIASTINAL DISORDERS	55.3 ( 7.71 - 396.74 )	55.3 ( 52.75 )	53.33-57.27	54.72 ( 10.52 )	5.77 ( 4.08 )
ENZYME LEVEL ABNORMAL	1	INVESTIGATIONS	50.96 ( 7.11 - 365.33 )	50.96 ( 48.5 )	48.99-52.93	50.47 ( 9.71 )	5.66 ( 3.97 )
FLUORIDE INCREASED	1	INVESTIGATIONS	106.09 ( 14.65 - 768.36 )	106.08 ( 102 )	104.1-108.06	103.98 ( 19.83 )	6.7 ( 4.99 )
GRANULOMATOUS LIVER DISEASE	1	HEPATOBILIARY DISORDERS	8.41 ( 1.18 - 59.82 )	8.41 ( 6.52 )	6.45-10.37	8.4 ( 1.63 )	3.07 ( 1.4 )
INTRACRANIAL PRESSURE INCREASED	1	NERVOUS SYSTEM DISORDERS	1.1 ( 0.15 - 7.82 )	1.1 ( 0.01 )	-0.86-3.06	1.1 ( 0.21 )	0.14 ( -1.53 )
CHEILITIS	1	GASTROINTESTINAL DISORDERS	1.11 ( 0.16 - 7.9 )	1.11 ( 0.01 )	-0.85-3.07	1.11 ( 0.22 )	0.15 ( -1.51 )
FUNGAL SKIN INFECTION	1	INFECTIONS AND INFESTATIONS	1.55 ( 0.22 - 10.99 )	1.55 ( 0.19 )	-0.41-3.51	1.55 ( 0.3 )	0.63 ( -1.04 )
RAYNAUD'S PHENOMENON	1	VASCULAR DISORDERS	1.25 ( 0.18 - 8.86 )	1.25 ( 0.05 )	-0.71-3.21	1.25 ( 0.24 )	0.32 ( -1.35 )
PETIT MAL EPILEPSY	1	NERVOUS SYSTEM DISORDERS	1.22 ( 0.17 - 8.65 )	1.22 ( 0.04 )	-0.74-3.18	1.22 ( 0.24 )	0.28 ( -1.38 )
IMPAIRED WORK ABILITY	1	SOCIAL CIRCUMSTANCES	0.27 ( 0.04 - 1.94 )	0.27 ( 1.93 )	-1.69-2.23	0.27 ( 0.05 )	-1.87 ( -3.54 )
ATRIAL FLUTTER	1	CARDIAC DISORDERS	0.74 ( 0.1 - 5.23 )	0.74 ( 0.09 )	-1.22-2.7	0.74 ( 0.14 )	-0.44 ( -2.11 )
PULMONARY THROMBOSIS	1	RESPIRATORY, THORACIC AND MEDIASTINAL DISORDERS	0.57 ( 0.08 - 4.06 )	0.57 ( 0.32 )	-1.39-2.53	0.57 ( 0.11 )	-0.81 ( -2.47 )
PORTAL VEIN FLOW DECREASED	1	INVESTIGATIONS	144.4 ( 19.8 - 1053.32 )	144.38 ( 138.54 )	142.4-146.37	140.51 ( 26.64 )	7.13 ( 5.4 )
VIRAL HAEMORRHAGIC CYSTITIS	1	INFECTIONS AND INFESTATIONS	11.23 ( 1.58 - 79.88 )	11.23 ( 9.3 )	9.26-13.19	11.2 ( 2.17 )	3.49 ( 1.81 )
BLOOD CREATINE PHOSPHOKINASE INCREASED	1	INVESTIGATIONS	0.2 ( 0.03 - 1.39 )	0.2 ( 3.29 )	-1.76-2.16	0.2 ( 0.04 )	-2.35 ( -4.01 )
DIASTOLIC HYPERTENSION	1	VASCULAR DISORDERS	45.2 ( 6.31 - 323.68 )	45.2 ( 42.85 )	43.23-47.17	44.82 ( 8.63 )	5.49 ( 3.8 )
SIALOADENITIS	1	INFECTIONS AND INFESTATIONS	4.58 ( 0.64 - 32.52 )	4.58 ( 2.79 )	2.61-6.54	4.57 ( 0.89 )	2.19 ( 0.52 )
MUCOSAL TOXICITY	1	GENERAL DISORDERS AND ADMINISTRATION SITE CONDITIONS	22.8 ( 3.2 - 162.57 )	22.8 ( 20.75 )	20.83-24.76	22.7 ( 4.39 )	4.5 ( 2.83 )
CREATININE RENAL CLEARANCE DECREASED	1	INVESTIGATIONS	1.39 ( 0.2 - 9.89 )	1.39 ( 0.11 )	-0.57-3.35	1.39 ( 0.27 )	0.48 ( -1.19 )
NON-CIRRHOTIC PORTAL HYPERTENSION	1	HEPATOBILIARY DISORDERS	19.77 ( 2.77 - 140.86 )	19.76 ( 17.75 )	17.8-21.73	19.69 ( 3.81 )	4.3 ( 2.62 )
ANGINA PECTORIS	1	CARDIAC DISORDERS	0.2 ( 0.03 - 1.42 )	0.2 ( 3.2 )	-1.76-2.16	0.2 ( 0.04 )	-2.32 ( -3.99 )
HAEMOPTYSIS	1	RESPIRATORY, THORACIC AND MEDIASTINAL DISORDERS	0.21 ( 0.03 - 1.52 )	0.21 ( 2.87 )	-1.75-2.17	0.21 ( 0.04 )	-2.22 ( -3.89 )
PULMONARY PAIN	1	RESPIRATORY, THORACIC AND MEDIASTINAL DISORDERS	2.3 ( 0.32 - 16.35 )	2.3 ( 0.74 )	0.34-4.26	2.3 ( 0.45 )	1.2 ( -0.46 )
HEART RATE IRREGULAR	1	INVESTIGATIONS	0.25 ( 0.04 - 1.81 )	0.25 ( 2.18 )	-1.71-2.21	0.25 ( 0.05 )	-1.97 ( -3.64 )
ARTERIAL PERFORATION	1	VASCULAR DISORDERS	148.52 ( 20.35 - 1084.24 )	148.51 ( 142.44 )	146.52-150.5	144.41 ( 27.37 )	7.17 ( 5.44 )
DISTURBANCE IN ATTENTION	1	NERVOUS SYSTEM DISORDERS	0.11 ( 0.02 - 0.77 )	0.11 ( 7.33 )	-1.85-2.07	0.11 ( 0.02 )	-3.2 ( -4.87 )
PERIPHERAL SENSORY NEUROPATHY	1	NERVOUS SYSTEM DISORDERS	1.1 ( 0.15 - 7.79 )	1.1 ( 0.01 )	-0.86-3.06	1.1 ( 0.21 )	0.13 ( -1.53 )
VULVOVAGINAL INFLAMMATION	1	REPRODUCTIVE SYSTEM AND BREAST DISORDERS	9.09 ( 1.28 - 64.63 )	9.09 ( 7.18 )	7.13-11.05	9.07 ( 1.76 )	3.18 ( 1.51 )
SEDATION	1	NERVOUS SYSTEM DISORDERS	0.25 ( 0.04 - 1.79 )	0.25 ( 2.21 )	-1.71-2.21	0.25 ( 0.05 )	-1.99 ( -3.65 )
FUNGAEMIA	1	INFECTIONS AND INFESTATIONS	4.11 ( 0.58 - 29.2 )	4.11 ( 2.35 )	2.15-6.07	4.11 ( 0.8 )	2.04 ( 0.37 )
TONSIL CANCER	1	NEOPLASMS BENIGN, MALIGNANT AND UNSPECIFIED (INCL CYSTS AND POLYPS)	7.18 ( 1.01 - 51.05 )	7.18 ( 5.31 )	5.22-9.14	7.17 ( 1.39 )	2.84 ( 1.17 )
INTESTINE TRANSPLANT REJECTION	1	IMMUNE SYSTEM DISORDERS	74.26 ( 10.31 - 534.66 )	74.25 ( 71.25 )	72.28-76.23	73.22 ( 14.04 )	6.19 ( 4.49 )
MUSCLE SPASMS	1	MUSCULOSKELETAL AND CONNECTIVE TISSUE DISORDERS	0.03 ( 0 - 0.23 )	0.03 ( 28.85 )	-1.93-1.99	0.03 ( 0.01 )	-4.94 ( -6.61 )
LOCALISED INFECTION	1	INFECTIONS AND INFESTATIONS	0.25 ( 0.04 - 1.78 )	0.25 ( 2.25 )	-1.71-2.21	0.25 ( 0.05 )	-2 ( -3.67 )
MEDIASTINITIS	1	INFECTIONS AND INFESTATIONS	11.06 ( 1.55 - 78.69 )	11.06 ( 9.13 )	9.1-13.02	11.04 ( 2.14 )	3.46 ( 1.79 )
DIABETIC FOOT	1	SKIN AND SUBCUTANEOUS TISSUE DISORDERS	1.49 ( 0.21 - 10.57 )	1.49 ( 0.16 )	-0.47-3.45	1.49 ( 0.29 )	0.57 ( -1.09 )
CENTRAL NERVOUS SYSTEM INFECTION	1	INFECTIONS AND INFESTATIONS	5.58 ( 0.79 - 39.68 )	5.58 ( 3.76 )	3.62-7.54	5.58 ( 1.08 )	2.48 ( 0.81 )
EPSTEIN-BARR VIRUS ANTIBODY POSITIVE	1	INVESTIGATIONS	14.89 ( 2.09 - 106.05 )	14.89 ( 12.92 )	12.93-16.86	14.85 ( 2.87 )	3.89 ( 2.22 )
MAGNETIC RESONANCE IMAGING ABNORMAL	1	INVESTIGATIONS	1.25 ( 0.18 - 8.86 )	1.25 ( 0.05 )	-0.71-3.21	1.25 ( 0.24 )	0.32 ( -1.35 )
SEMINOMA	1	NEOPLASMS BENIGN, MALIGNANT AND UNSPECIFIED (INCL CYSTS AND POLYPS)	25.36 ( 3.55 - 180.9 )	25.36 ( 23.28 )	23.39-27.32	25.24 ( 4.88 )	4.66 ( 2.98 )
IMMUNE RECOVERY UVEITIS	1	IMMUNE SYSTEM DISORDERS	226.01 ( 30.52 - 1673.78 )	225.99 ( 214.66 )	223.99-227.99	216.62 ( 40.56 )	7.76 ( 6 )
RENAL LYMPHOCELE	1	INJURY, POISONING AND PROCEDURAL COMPLICATIONS	118.14 ( 16.28 - 857.6 )	118.13 ( 113.56 )	116.15-120.11	115.53 ( 22 )	6.85 ( 5.13 )
PARAESTHESIA ORAL	1	GASTROINTESTINAL DISORDERS	0.43 ( 0.06 - 3.08 )	0.43 ( 0.74 )	-1.53-2.39	0.43 ( 0.08 )	-1.21 ( -2.87 )
RENAL TUBULAR INJURY	1	RENAL AND URINARY DISORDERS	7.4 ( 1.04 - 52.65 )	7.4 ( 5.53 )	5.44-9.37	7.4 ( 1.43 )	2.89 ( 1.22 )
INFANTILE SPITTING UP	1	GASTROINTESTINAL DISORDERS	15.7 ( 2.21 - 111.83 )	15.7 ( 13.73 )	13.74-17.67	15.66 ( 3.03 )	3.97 ( 2.3 )
EXTRA DOSE ADMINISTERED	1	INJURY, POISONING AND PROCEDURAL COMPLICATIONS	0.2 ( 0.03 - 1.44 )	0.2 ( 3.13 )	-1.76-2.16	0.2 ( 0.04 )	-2.3 ( -3.97 )
PREGNANCY OF PARTNER	1	SOCIAL CIRCUMSTANCES	7.98 ( 1.12 - 56.78 )	7.98 ( 6.1 )	6.02-9.95	7.97 ( 1.54 )	3 ( 1.33 )
MACROCYTOSIS	1	BLOOD AND LYMPHATIC SYSTEM DISORDERS	4.99 ( 0.7 - 35.45 )	4.99 ( 3.19 )	3.03-6.95	4.98 ( 0.97 )	2.32 ( 0.65 )
CYTOMEGALOVIRUS TEST NEGATIVE	1	INVESTIGATIONS	866.38 ( 104.29 - 7197.28 )	866.3 ( 740.83 )	864.18-868.41	742.68 ( 126.32 )	9.54 ( 7.58 )
FULL BLOOD COUNT DECREASED	1	INVESTIGATIONS	0.31 ( 0.04 - 2.23 )	0.31 ( 1.49 )	-1.65-2.27	0.31 ( 0.06 )	-1.67 ( -3.34 )
BLOOD TEST ABNORMAL	1	INVESTIGATIONS	0.45 ( 0.06 - 3.19 )	0.45 ( 0.67 )	-1.51-2.41	0.45 ( 0.09 )	-1.15 ( -2.82 )
NERVOUSNESS	1	PSYCHIATRIC DISORDERS	0.11 ( 0.02 - 0.78 )	0.11 ( 7.25 )	-1.85-2.07	0.11 ( 0.02 )	-3.19 ( -4.86 )
FLUSHING	1	VASCULAR DISORDERS	0.06 ( 0.01 - 0.41 )	0.06 ( 15.45 )	-1.9-2.02	0.06 ( 0.01 )	-4.12 ( -5.78 )
ABNORMAL BEHAVIOUR	1	PSYCHIATRIC DISORDERS	0.14 ( 0.02 - 1.01 )	0.14 ( 5.15 )	-1.82-2.1	0.14 ( 0.03 )	-2.81 ( -4.47 )
AGGRESSION	1	PSYCHIATRIC DISORDERS	0.12 ( 0.02 - 0.83 )	0.12 ( 6.64 )	-1.84-2.08	0.12 ( 0.02 )	-3.09 ( -4.76 )
ROAD TRAFFIC ACCIDENT	1	INJURY, POISONING AND PROCEDURAL COMPLICATIONS	0.15 ( 0.02 - 1.04 )	0.15 ( 4.97 )	-1.81-2.11	0.15 ( 0.03 )	-2.77 ( -4.44 )
SWOLLEN TONGUE	1	GASTROINTESTINAL DISORDERS	0.19 ( 0.03 - 1.36 )	0.19 ( 3.4 )	-1.77-2.15	0.19 ( 0.04 )	-2.38 ( -4.05 )
ADVERSE DRUG REACTION	1	GENERAL DISORDERS AND ADMINISTRATION SITE CONDITIONS	0.07 ( 0.01 - 0.53 )	0.07 ( 11.46 )	-1.89-2.03	0.07 ( 0.01 )	-3.74 ( -5.41 )
GASTROINTESTINAL TUBE INSERTION	1	SURGICAL AND MEDICAL PROCEDURES	2.6 ( 0.37 - 18.43 )	2.59 ( 0.98 )	0.63-4.56	2.59 ( 0.5 )	1.38 ( -0.29 )
PANCREATIC DISORDER	1	GASTROINTESTINAL DISORDERS	1.33 ( 0.19 - 9.41 )	1.33 ( 0.08 )	-0.63-3.29	1.33 ( 0.26 )	0.41 ( -1.26 )
PROCEDURAL PAIN	1	INJURY, POISONING AND PROCEDURAL COMPLICATIONS	0.23 ( 0.03 - 1.63 )	0.23 ( 2.58 )	-1.73-2.19	0.23 ( 0.04 )	-2.12 ( -3.79 )
SURGERY	1	SURGICAL AND MEDICAL PROCEDURES	0.12 ( 0.02 - 0.84 )	0.12 ( 6.56 )	-1.84-2.08	0.12 ( 0.02 )	-3.08 ( -4.74 )
PERIPHERAL COLDNESS	1	VASCULAR DISORDERS	0.44 ( 0.06 - 3.11 )	0.44 ( 0.72 )	-1.52-2.4	0.44 ( 0.09 )	-1.19 ( -2.86 )
OESOPHAGOGASTRIC FUNDOPLASTY	1	SURGICAL AND MEDICAL PROCEDURES	35.6 ( 4.98 - 254.49 )	35.6 ( 33.4 )	33.63-37.57	35.37 ( 6.82 )	5.14 ( 3.46 )
MENSTRUATION IRREGULAR	1	REPRODUCTIVE SYSTEM AND BREAST DISORDERS	0.22 ( 0.03 - 1.56 )	0.22 ( 2.78 )	-1.74-2.18	0.22 ( 0.04 )	-2.19 ( -3.86 )
HIGH FAT DIET	1	SURGICAL AND MEDICAL PROCEDURES	2599.15 ( 235.65 - 28667.47 )	2598.89 ( 1731.26 )	2596.49-2601.29	1732.93 ( 232.51 )	10.76 ( 8.56 )
INFLUENZA	1	INFECTIONS AND INFESTATIONS	0.06 ( 0.01 - 0.42 )	0.06 ( 15.02 )	-1.9-2.02	0.06 ( 0.01 )	-4.08 ( -5.75 )
AMENORRHOEA	1	REPRODUCTIVE SYSTEM AND BREAST DISORDERS	0.36 ( 0.05 - 2.55 )	0.36 ( 1.14 )	-1.6-2.32	0.36 ( 0.07 )	-1.48 ( -3.14 )
FAECES DISCOLOURED	1	GASTROINTESTINAL DISORDERS	0.28 ( 0.04 - 1.96 )	0.28 ( 1.9 )	-1.68-2.24	0.28 ( 0.05 )	-1.86 ( -3.52 )
FREQUENT BOWEL MOVEMENTS	1	GASTROINTESTINAL DISORDERS	0.25 ( 0.03 - 1.75 )	0.25 ( 2.3 )	-1.71-2.21	0.25 ( 0.05 )	-2.02 ( -3.69 )
EXPOSURE VIA SKIN CONTACT	1	INJURY, POISONING AND PROCEDURAL COMPLICATIONS	1.21 ( 0.17 - 8.59 )	1.21 ( 0.04 )	-0.75-3.17	1.21 ( 0.23 )	0.28 ( -1.39 )
FAECES PALE	1	GASTROINTESTINAL DISORDERS	2.71 ( 0.38 - 19.23 )	2.71 ( 1.08 )	0.75-4.67	2.71 ( 0.52 )	1.44 ( -0.23 )
LABORATORY TEST ABNORMAL	1	INVESTIGATIONS	0.21 ( 0.03 - 1.48 )	0.21 ( 3.01 )	-1.75-2.17	0.21 ( 0.04 )	-2.26 ( -3.93 )
THERAPY CHANGE	1	SURGICAL AND MEDICAL PROCEDURES	0.72 ( 0.1 - 5.11 )	0.72 ( 0.11 )	-1.24-2.68	0.72 ( 0.14 )	-0.48 ( -2.14 )
ULCER	1	GENERAL DISORDERS AND ADMINISTRATION SITE CONDITIONS	0.38 ( 0.05 - 2.71 )	0.38 ( 1 )	-1.58-2.34	0.38 ( 0.07 )	-1.39 ( -3.06 )
ADVERSE REACTION	1	GENERAL DISORDERS AND ADMINISTRATION SITE CONDITIONS	0.47 ( 0.07 - 3.33 )	0.47 ( 0.6 )	-1.49-2.43	0.47 ( 0.09 )	-1.09 ( -2.76 )
HAIR COLOUR CHANGES	1	SKIN AND SUBCUTANEOUS TISSUE DISORDERS	0.45 ( 0.06 - 3.18 )	0.45 ( 0.68 )	-1.51-2.41	0.45 ( 0.09 )	-1.16 ( -2.82 )
EYELID OEDEMA	1	EYE DISORDERS	0.48 ( 0.07 - 3.44 )	0.48 ( 0.55 )	-1.48-2.44	0.48 ( 0.09 )	-1.04 ( -2.71 )
NASAL CONGESTION	1	RESPIRATORY, THORACIC AND MEDIASTINAL DISORDERS	0.11 ( 0.02 - 0.77 )	0.11 ( 7.29 )	-1.85-2.07	0.11 ( 0.02 )	-3.2 ( -4.86 )
ABDOMINAL ABSCESS	1	INFECTIONS AND INFESTATIONS	1.43 ( 0.2 - 10.13 )	1.43 ( 0.13 )	-0.53-3.39	1.43 ( 0.28 )	0.51 ( -1.15 )
ACUTE SINUSITIS	1	INFECTIONS AND INFESTATIONS	3.4 ( 0.48 - 24.17 )	3.4 ( 1.69 )	1.44-5.36	3.4 ( 0.66 )	1.77 ( 0.1 )
ARTHRITIS INFECTIVE	1	INFECTIONS AND INFESTATIONS	1.33 ( 0.19 - 9.47 )	1.33 ( 0.08 )	-0.63-3.29	1.33 ( 0.26 )	0.42 ( -1.25 )
INFECTIVE SPONDYLITIS	1	INFECTIONS AND INFESTATIONS	22.12 ( 3.1 - 157.71 )	22.12 ( 20.08 )	20.15-24.08	22.03 ( 4.26 )	4.46 ( 2.78 )
OSTEONECROSIS	1	MUSCULOSKELETAL AND CONNECTIVE TISSUE DISORDERS	0.17 ( 0.02 - 1.17 )	0.17 ( 4.22 )	-1.79-2.13	0.17 ( 0.03 )	-2.6 ( -4.26 )
PAROTITIS	1	INFECTIONS AND INFESTATIONS	5.33 ( 0.75 - 37.85 )	5.33 ( 3.51 )	3.36-7.29	5.32 ( 1.03 )	2.41 ( 0.74 )
PELVIC ABSCESS	1	INFECTIONS AND INFESTATIONS	5.26 ( 0.74 - 37.35 )	5.26 ( 3.44 )	3.29-7.22	5.25 ( 1.02 )	2.39 ( 0.72 )
SKIN INFECTION	1	INFECTIONS AND INFESTATIONS	0.56 ( 0.08 - 4 )	0.56 ( 0.34 )	-1.4-2.52	0.56 ( 0.11 )	-0.83 ( -2.49 )
SYSTEMIC INFLAMMATORY RESPONSE SYNDROME	1	GENERAL DISORDERS AND ADMINISTRATION SITE CONDITIONS	1.55 ( 0.22 - 10.99 )	1.55 ( 0.19 )	-0.41-3.51	1.55 ( 0.3 )	0.63 ( -1.04 )
DEMENTIA ALZHEIMER'S TYPE	1	NERVOUS SYSTEM DISORDERS	0.65 ( 0.09 - 4.64 )	0.65 ( 0.18 )	-1.31-2.61	0.65 ( 0.13 )	-0.61 ( -2.28 )
GLAUCOMA	1	EYE DISORDERS	0.31 ( 0.04 - 2.23 )	0.31 ( 1.49 )	-1.65-2.27	0.31 ( 0.06 )	-1.67 ( -3.33 )
VITAMIN D DEFICIENCY	1	METABOLISM AND NUTRITION DISORDERS	0.63 ( 0.09 - 4.46 )	0.63 ( 0.22 )	-1.33-2.59	0.63 ( 0.12 )	-0.67 ( -2.34 )
PROTHROMBIN TIME PROLONGED	1	INVESTIGATIONS	0.91 ( 0.13 - 6.47 )	0.91 ( 0.01 )	-1.05-2.87	0.91 ( 0.18 )	-0.13 ( -1.8 )
CONJUNCTIVAL HAEMORRHAGE	1	EYE DISORDERS	1.53 ( 0.22 - 10.87 )	1.53 ( 0.18 )	-0.43-3.49	1.53 ( 0.3 )	0.61 ( -1.05 )
LACRIMAL DISORDER	1	EYE DISORDERS	10.05 ( 1.41 - 71.52 )	10.05 ( 8.14 )	8.09-12.02	10.04 ( 1.94 )	3.33 ( 1.66 )
NECROSIS	1	GENERAL DISORDERS AND ADMINISTRATION SITE CONDITIONS	1.06 ( 0.15 - 7.56 )	1.06 ( 0 )	-0.9-3.02	1.06 ( 0.21 )	0.09 ( -1.58 )
RHINITIS	1	INFECTIONS AND INFESTATIONS	0.77 ( 0.11 - 5.44 )	0.77 ( 0.07 )	-1.19-2.73	0.77 ( 0.15 )	-0.38 ( -2.05 )
PNEUMONIA VIRAL	1	INFECTIONS AND INFESTATIONS	2.03 ( 0.29 - 14.39 )	2.03 ( 0.52 )	0.07-3.99	2.03 ( 0.39 )	1.02 ( -0.65 )
ANTIVIRAL DRUG LEVEL ABOVE THERAPEUTIC	1	INVESTIGATIONS	89.63 ( 12.41 - 647.14 )	89.62 ( 86.14 )	87.64-91.59	88.11 ( 16.85 )	6.46 ( 4.75 )
INCORRECT PRODUCT DOSAGE FORM ADMINISTERED	1	INJURY, POISONING AND PROCEDURAL COMPLICATIONS	5.88 ( 0.83 - 41.8 )	5.88 ( 4.05 )	3.92-7.84	5.87 ( 1.14 )	2.55 ( 0.89 )
PRODUCT TAMPERING	1	PRODUCT ISSUES	4.33 ( 0.61 - 30.76 )	4.33 ( 2.56 )	2.37-6.29	4.33 ( 0.84 )	2.11 ( 0.44 )
DISSEMINATED TUBERCULOSIS	1	INFECTIONS AND INFESTATIONS	2.49 ( 0.35 - 17.68 )	2.49 ( 0.89 )	0.53-4.45	2.49 ( 0.48 )	1.32 ( -0.35 )
TONGUE INJURY	1	INJURY, POISONING AND PROCEDURAL COMPLICATIONS	6.56 ( 0.92 - 46.6 )	6.55 ( 4.7 )	4.59-8.52	6.55 ( 1.27 )	2.71 ( 1.04 )
SERUM FERRITIN INCREASED	1	INVESTIGATIONS	1.17 ( 0.16 - 8.3 )	1.17 ( 0.02 )	-0.79-3.13	1.17 ( 0.23 )	0.23 ( -1.44 )
HEPATITIS VIRAL	1	INFECTIONS AND INFESTATIONS	7.62 ( 1.07 - 54.19 )	7.62 ( 5.74 )	5.66-9.58	7.61 ( 1.47 )	2.93 ( 1.26 )
T-CELL LYMPHOMA STAGE IV	1	NEOPLASMS BENIGN, MALIGNANT AND UNSPECIFIED (INCL CYSTS AND POLYPS)	98.08 ( 13.56 - 709.31 )	98.07 ( 94.3 )	96.09-100.05	96.27 ( 18.39 )	6.59 ( 4.88 )
THROAT CANCER	1	NEOPLASMS BENIGN, MALIGNANT AND UNSPECIFIED (INCL CYSTS AND POLYPS)	1.31 ( 0.18 - 9.28 )	1.31 ( 0.07 )	-0.65-3.27	1.31 ( 0.25 )	0.39 ( -1.28 )
SUPERINFECTION BACTERIAL	1	INFECTIONS AND INFESTATIONS	8.95 ( 1.26 - 63.63 )	8.95 ( 7.05 )	6.98-10.91	8.93 ( 1.73 )	3.16 ( 1.49 )
SUPERINFECTION VIRAL	1	INFECTIONS AND INFESTATIONS	133.29 ( 18.31 - 970.28 )	133.28 ( 128 )	131.29-135.26	129.97 ( 24.69 )	7.02 ( 5.3 )
DIVERTICULAR PERFORATION	1	GASTROINTESTINAL DISORDERS	2.8 ( 0.39 - 19.86 )	2.8 ( 1.15 )	0.84-4.76	2.8 ( 0.54 )	1.48 ( -0.18 )
ENTEROCOLITIS VIRAL	1	INFECTIONS AND INFESTATIONS	26.39 ( 3.7 - 188.28 )	26.38 ( 24.3 )	24.42-28.35	26.26 ( 5.07 )	4.71 ( 3.04 )
LIVE BIRTH	1	PREGNANCY, PUERPERIUM AND PERINATAL CONDITIONS	0.85 ( 0.12 - 6.04 )	0.85 ( 0.03 )	-1.11-2.81	0.85 ( 0.17 )	-0.23 ( -1.9 )
PREMATURE BABY	1	PREGNANCY, PUERPERIUM AND PERINATAL CONDITIONS	0.19 ( 0.03 - 1.38 )	0.19 ( 3.35 )	-1.77-2.15	0.19 ( 0.04 )	-2.37 ( -4.03 )
JOINT RANGE OF MOTION DECREASED	1	MUSCULOSKELETAL AND CONNECTIVE TISSUE DISORDERS	0.51 ( 0.07 - 3.65 )	0.51 ( 0.46 )	-1.45-2.47	0.51 ( 0.1 )	-0.96 ( -2.62 )
MEAN CELL HAEMOGLOBIN INCREASED	1	INVESTIGATIONS	3.98 ( 0.56 - 28.3 )	3.98 ( 2.23 )	2.02-5.94	3.98 ( 0.77 )	1.99 ( 0.32 )
SWALLOW STUDY ABNORMAL	1	INVESTIGATIONS	472.57 ( 61 - 3660.8 )	472.53 ( 431.32 )	470.48-474.57	433.23 ( 78.12 )	8.76 ( 6.91 )
SINUS BRADYCARDIA	1	CARDIAC DISORDERS	0.62 ( 0.09 - 4.39 )	0.62 ( 0.23 )	-1.34-2.58	0.62 ( 0.12 )	-0.69 ( -2.36 )
URINE OUTPUT DECREASED	1	INVESTIGATIONS	0.67 ( 0.09 - 4.76 )	0.67 ( 0.16 )	-1.29-2.63	0.67 ( 0.13 )	-0.58 ( -2.24 )
ACUTE LEFT VENTRICULAR FAILURE	1	CARDIAC DISORDERS	8.95 ( 1.26 - 63.63 )	8.95 ( 7.05 )	6.98-10.91	8.93 ( 1.73 )	3.16 ( 1.49 )
HIV TEST POSITIVE	1	INVESTIGATIONS	8.78 ( 1.23 - 62.45 )	8.78 ( 6.88 )	6.82-10.74	8.77 ( 1.7 )	3.13 ( 1.46 )
BALANCE DISORDER	1	NERVOUS SYSTEM DISORDERS	0.07 ( 0.01 - 0.49 )	0.07 ( 12.61 )	-1.89-2.03	0.07 ( 0.01 )	-3.86 ( -5.53 )
INTENTIONAL UNDERDOSE	1	INJURY, POISONING AND PROCEDURAL COMPLICATIONS	0.83 ( 0.12 - 5.9 )	0.83 ( 0.03 )	-1.13-2.79	0.83 ( 0.16 )	-0.27 ( -1.93 )
HAIR GROWTH ABNORMAL	1	SKIN AND SUBCUTANEOUS TISSUE DISORDERS	0.87 ( 0.12 - 6.2 )	0.87 ( 0.02 )	-1.09-2.83	0.87 ( 0.17 )	-0.2 ( -1.86 )
ILLNESS ANXIETY DISORDER	1	PSYCHIATRIC DISORDERS	14.81 ( 2.08 - 105.44 )	14.81 ( 12.84 )	12.85-16.77	14.77 ( 2.86 )	3.88 ( 2.21 )
TENDON RUPTURE	1	INJURY, POISONING AND PROCEDURAL COMPLICATIONS	0.48 ( 0.07 - 3.38 )	0.48 ( 0.58 )	-1.48-2.44	0.48 ( 0.09 )	-1.07 ( -2.74 )
RENAL GRAFT INFECTION	1	INFECTIONS AND INFESTATIONS	30.4 ( 4.26 - 217.07 )	30.4 ( 28.26 )	28.43-32.36	30.23 ( 5.83 )	4.92 ( 3.24 )
AUTOIMMUNE HAEMOLYTIC ANAEMIA	1	BLOOD AND LYMPHATIC SYSTEM DISORDERS	1.51 ( 0.21 - 10.71 )	1.51 ( 0.17 )	-0.45-3.47	1.51 ( 0.29 )	0.59 ( -1.07 )
EVANS SYNDROME	1	BLOOD AND LYMPHATIC SYSTEM DISORDERS	15.29 ( 2.15 - 108.87 )	15.29 ( 13.31 )	13.32-17.25	15.25 ( 2.95 )	3.93 ( 2.26 )
VIRAL LOAD UNDETECTABLE	1	INVESTIGATIONS	99.97 ( 13.82 - 723.21 )	99.96 ( 96.12 )	97.98-101.94	98.09 ( 18.73 )	6.62 ( 4.9 )
PLASMA CELL MYELOMA	1	NEOPLASMS BENIGN, MALIGNANT AND UNSPECIFIED (INCL CYSTS AND POLYPS)	0.14 ( 0.02 - 0.97 )	0.14 ( 5.43 )	-1.82-2.1	0.14 ( 0.03 )	-2.86 ( -4.53 )
CEREBRAL ARTERIOSCLEROSIS	1	NERVOUS SYSTEM DISORDERS	13.54 ( 1.9 - 96.36 )	13.54 ( 11.58 )	11.57-15.5	13.5 ( 2.61 )	3.76 ( 2.08 )
PAPULE	1	SKIN AND SUBCUTANEOUS TISSUE DISORDERS	0.94 ( 0.13 - 6.67 )	0.94 ( 0 )	-1.02-2.9	0.94 ( 0.18 )	-0.09 ( -1.76 )
RIGHT VENTRICULAR DYSFUNCTION	1	CARDIAC DISORDERS	6.13 ( 0.86 - 43.57 )	6.13 ( 4.29 )	4.17-8.09	6.12 ( 1.19 )	2.61 ( 0.95 )
VENTRICULAR HYPOKINESIA	1	CARDIAC DISORDERS	1.82 ( 0.26 - 12.94 )	1.82 ( 0.37 )	-0.14-3.78	1.82 ( 0.35 )	0.87 ( -0.8 )
VENTRICULAR INTERNAL DIAMETER ABNORMAL	1	INVESTIGATIONS	59.07 ( 8.23 - 424.09 )	59.07 ( 56.44 )	57.09-61.04	58.41 ( 11.23 )	5.87 ( 4.17 )
ELECTROCARDIOGRAM ABNORMAL	1	INVESTIGATIONS	0.74 ( 0.1 - 5.24 )	0.74 ( 0.09 )	-1.22-2.7	0.74 ( 0.14 )	-0.44 ( -2.1 )
INJURY	1	INJURY, POISONING AND PROCEDURAL COMPLICATIONS	0.08 ( 0.01 - 0.58 )	0.08 ( 10.41 )	-1.88-2.04	0.08 ( 0.02 )	-3.62 ( -5.29 )
RHABDOMYOLYSIS	1	MUSCULOSKELETAL AND CONNECTIVE TISSUE DISORDERS	0.15 ( 0.02 - 1.05 )	0.15 ( 4.93 )	-1.81-2.11	0.15 ( 0.03 )	-2.76 ( -4.43 )
END STAGE RENAL DISEASE	1	RENAL AND URINARY DISORDERS	0.3 ( 0.04 - 2.16 )	0.3 ( 1.6 )	-1.66-2.26	0.3 ( 0.06 )	-1.72 ( -3.38 )
DEAFNESS NEUROSENSORY	1	EAR AND LABYRINTH DISORDERS	1.98 ( 0.28 - 14.03 )	1.98 ( 0.48 )	0.02-3.94	1.98 ( 0.38 )	0.98 ( -0.69 )
HALLUCINATIONS, MIXED	1	PSYCHIATRIC DISORDERS	1.51 ( 0.21 - 10.74 )	1.51 ( 0.17 )	-0.45-3.47	1.51 ( 0.29 )	0.6 ( -1.07 )
BUNDLE BRANCH BLOCK BILATERAL	1	CARDIAC DISORDERS	74.26 ( 10.31 - 534.66 )	74.25 ( 71.25 )	72.28-76.23	73.22 ( 14.04 )	6.19 ( 4.49 )
ANAPHYLACTIC SHOCK	1	IMMUNE SYSTEM DISORDERS	0.25 ( 0.04 - 1.78 )	0.25 ( 2.23 )	-1.71-2.21	0.25 ( 0.05 )	-1.99 ( -3.66 )
TRACHEITIS	1	INFECTIONS AND INFESTATIONS	8.12 ( 1.14 - 57.76 )	8.12 ( 6.23 )	6.16-10.08	8.11 ( 1.57 )	3.02 ( 1.35 )
VOCAL CORD DISORDER	1	RESPIRATORY, THORACIC AND MEDIASTINAL DISORDERS	3.03 ( 0.43 - 21.49 )	3.03 ( 1.36 )	1.07-4.99	3.02 ( 0.59 )	1.6 ( -0.07 )
ALANINE AMINOTRANSFERASE	1	INVESTIGATIONS	27.5 ( 3.85 - 196.29 )	27.5 ( 25.4 )	25.54-29.47	27.36 ( 5.28 )	4.77 ( 3.09 )
ASPARTATE AMINOTRANSFERASE	1	INVESTIGATIONS	24.52 ( 3.44 - 174.9 )	24.52 ( 22.45 )	22.55-26.48	24.41 ( 4.72 )	4.61 ( 2.93 )
SERUM SICKNESS	1	IMMUNE SYSTEM DISORDERS	2.16 ( 0.3 - 15.31 )	2.15 ( 0.62 )	0.19-4.12	2.15 ( 0.42 )	1.11 ( -0.56 )
ODYNOPHAGIA	1	GASTROINTESTINAL DISORDERS	1.08 ( 0.15 - 7.64 )	1.08 ( 0.01 )	-0.88-3.04	1.08 ( 0.21 )	0.11 ( -1.56 )
TROPONIN INCREASED	1	INVESTIGATIONS	0.89 ( 0.13 - 6.31 )	0.89 ( 0.01 )	-1.07-2.85	0.89 ( 0.17 )	-0.17 ( -1.84 )
INFLUENZA B VIRUS TEST POSITIVE	1	INVESTIGATIONS	38.51 ( 5.38 - 275.38 )	38.5 ( 36.26 )	36.53-40.47	38.23 ( 7.37 )	5.26 ( 3.57 )
TRANSFUSION REACTION	1	INJURY, POISONING AND PROCEDURAL COMPLICATIONS	7.17 ( 1.01 - 50.98 )	7.17 ( 5.3 )	5.21-9.13	7.16 ( 1.39 )	2.84 ( 1.17 )
DERMATOMYOSITIS	1	SKIN AND SUBCUTANEOUS TISSUE DISORDERS	2.53 ( 0.36 - 17.97 )	2.53 ( 0.92 )	0.57-4.49	2.53 ( 0.49 )	1.34 ( -0.33 )
NECK MASS	1	MUSCULOSKELETAL AND CONNECTIVE TISSUE DISORDERS	2.17 ( 0.3 - 15.38 )	2.17 ( 0.63 )	0.21-4.13	2.17 ( 0.42 )	1.11 ( -0.55 )
CALCINOSIS	1	GENERAL DISORDERS AND ADMINISTRATION SITE CONDITIONS	2.67 ( 0.38 - 18.98 )	2.67 ( 1.05 )	0.71-4.63	2.67 ( 0.52 )	1.42 ( -0.25 )
DYSMORPHISM	1	CONGENITAL, FAMILIAL AND GENETIC DISORDERS	2.08 ( 0.29 - 14.8 )	2.08 ( 0.56 )	0.12-4.04	2.08 ( 0.4 )	1.06 ( -0.61 )
PURULENT DISCHARGE	1	INFECTIONS AND INFESTATIONS	1.38 ( 0.19 - 9.78 )	1.38 ( 0.1 )	-0.58-3.34	1.38 ( 0.27 )	0.46 ( -1.21 )
UPPER-AIRWAY COUGH SYNDROME	1	RESPIRATORY, THORACIC AND MEDIASTINAL DISORDERS	0.72 ( 0.1 - 5.11 )	0.72 ( 0.11 )	-1.24-2.68	0.72 ( 0.14 )	-0.47 ( -2.14 )
T-CELL PROLYMPHOCYTIC LEUKAEMIA	1	NEOPLASMS BENIGN, MALIGNANT AND UNSPECIFIED (INCL CYSTS AND POLYPS)	71.21 ( 9.9 - 512.4 )	71.2 ( 68.28 )	69.23-73.18	70.25 ( 13.48 )	6.13 ( 4.44 )
BLOOD URINE PRESENT	1	INVESTIGATIONS	0.31 ( 0.04 - 2.21 )	0.31 ( 1.52 )	-1.65-2.27	0.31 ( 0.06 )	-1.68 ( -3.35 )
CYSTITIS	1	INFECTIONS AND INFESTATIONS	0.18 ( 0.03 - 1.3 )	0.18 ( 3.64 )	-1.78-2.14	0.18 ( 0.04 )	-2.45 ( -4.11 )
MONOPARESIS	1	NERVOUS SYSTEM DISORDERS	3.27 ( 0.46 - 23.24 )	3.27 ( 1.58 )	1.31-5.23	3.27 ( 0.63 )	1.71 ( 0.04 )
RESPIRATORY SYNCYTIAL VIRUS INFECTION	1	INFECTIONS AND INFESTATIONS	0.91 ( 0.13 - 6.43 )	0.91 ( 0.01 )	-1.06-2.87	0.91 ( 0.18 )	-0.14 ( -1.81 )
ISCHAEMIA	1	VASCULAR DISORDERS	1.24 ( 0.18 - 8.84 )	1.24 ( 0.05 )	-0.72-3.2	1.24 ( 0.24 )	0.32 ( -1.35 )
RIGHT VENTRICULAR FAILURE	1	CARDIAC DISORDERS	0.81 ( 0.11 - 5.76 )	0.81 ( 0.04 )	-1.15-2.77	0.81 ( 0.16 )	-0.3 ( -1.97 )
DRUG LEVEL FLUCTUATING	1	INVESTIGATIONS	6.89 ( 0.97 - 48.95 )	6.88 ( 5.02 )	4.92-8.85	6.88 ( 1.33 )	2.78 ( 1.11 )
GENITOURINARY TRACT INFECTION	1	INFECTIONS AND INFESTATIONS	23.42 ( 3.28 - 166.99 )	23.41 ( 21.36 )	21.45-25.38	23.31 ( 4.51 )	4.54 ( 2.87 )
HYPERACUSIS	1	EAR AND LABYRINTH DISORDERS	1.62 ( 0.23 - 11.5 )	1.62 ( 0.24 )	-0.34-3.58	1.62 ( 0.31 )	0.69 ( -0.97 )
MYCOBACTERIUM FORTUITUM INFECTION	1	INFECTIONS AND INFESTATIONS	38.51 ( 5.38 - 275.38 )	38.5 ( 36.26 )	36.53-40.47	38.23 ( 7.37 )	5.26 ( 3.57 )
PANCREATIC PSEUDOCYST	1	GASTROINTESTINAL DISORDERS	7.64 ( 1.08 - 54.35 )	7.64 ( 5.77 )	5.68-9.61	7.63 ( 1.48 )	2.93 ( 1.26 )
UROGENITAL INFECTION BACTERIAL	1	INFECTIONS AND INFESTATIONS	148.52 ( 20.35 - 1084.24 )	148.51 ( 142.44 )	146.52-150.5	144.41 ( 27.37 )	7.17 ( 5.44 )
VENTRICULAR EXTRASYSTOLES	1	CARDIAC DISORDERS	0.56 ( 0.08 - 3.98 )	0.56 ( 0.34 )	-1.4-2.52	0.56 ( 0.11 )	-0.83 ( -2.5 )
BRONCHITIS FUNGAL	1	INFECTIONS AND INFESTATIONS	179.25 ( 24.41 - 1316.05 )	179.23 ( 171.33 )	177.24-181.23	173.29 ( 32.68 )	7.44 ( 5.69 )
NEUROPSYCHOLOGICAL SYMPTOMS	1	PSYCHIATRIC DISORDERS	4.27 ( 0.6 - 30.33 )	4.27 ( 2.5 )	2.31-6.23	4.26 ( 0.83 )	2.09 ( 0.42 )
INFECTIOUS MONONUCLEOSIS	1	INFECTIONS AND INFESTATIONS	2.68 ( 0.38 - 19.06 )	2.68 ( 1.06 )	0.72-4.64	2.68 ( 0.52 )	1.42 ( -0.24 )
NEUROENDOCRINE CARCINOMA OF THE SKIN	1	NEOPLASMS BENIGN, MALIGNANT AND UNSPECIFIED (INCL CYSTS AND POLYPS)	6.5 ( 0.91 - 46.19 )	6.5 ( 4.65 )	4.54-8.46	6.49 ( 1.26 )	2.7 ( 1.03 )
MENINGITIS BACTERIAL	1	INFECTIONS AND INFESTATIONS	4.22 ( 0.59 - 30.01 )	4.22 ( 2.46 )	2.26-6.18	4.22 ( 0.82 )	2.08 ( 0.41 )
GRAFT COMPLICATION	1	INJURY, POISONING AND PROCEDURAL COMPLICATIONS	10.42 ( 1.46 - 74.11 )	10.42 ( 8.5 )	8.45-12.38	10.4 ( 2.01 )	3.38 ( 1.71 )
CHRONIC RESPIRATORY FAILURE	1	RESPIRATORY, THORACIC AND MEDIASTINAL DISORDERS	5.44 ( 0.77 - 38.69 )	5.44 ( 3.62 )	3.48-7.4	5.44 ( 1.05 )	2.44 ( 0.77 )
BACTERIAL TOXAEMIA	1	INFECTIONS AND INFESTATIONS	41.92 ( 5.86 - 300 )	41.92 ( 39.62 )	39.95-43.89	41.59 ( 8.01 )	5.38 ( 3.69 )
BRONCHIAL SECRETION RETENTION	1	RESPIRATORY, THORACIC AND MEDIASTINAL DISORDERS	4.84 ( 0.68 - 34.43 )	4.84 ( 3.05 )	2.88-6.8	4.84 ( 0.94 )	2.28 ( 0.61 )
UNRESPONSIVE TO STIMULI	1	NERVOUS SYSTEM DISORDERS	0.24 ( 0.03 - 1.67 )	0.24 ( 2.48 )	-1.72-2.2	0.24 ( 0.05 )	-2.09 ( -3.75 )
SLEEP DEFICIT	1	NERVOUS SYSTEM DISORDERS	3.85 ( 0.54 - 27.34 )	3.85 ( 2.11 )	1.89-5.81	3.85 ( 0.75 )	1.94 ( 0.28 )
EYELID PTOSIS	1	EYE DISORDERS	0.64 ( 0.09 - 4.55 )	0.64 ( 0.2 )	-1.32-2.6	0.64 ( 0.12 )	-0.64 ( -2.31 )
HYPOKINESIA	1	NERVOUS SYSTEM DISORDERS	0.41 ( 0.06 - 2.88 )	0.41 ( 0.87 )	-1.55-2.37	0.41 ( 0.08 )	-1.3 ( -2.97 )
OPHTHALMOPLEGIA	1	EYE DISORDERS	3.02 ( 0.43 - 21.46 )	3.02 ( 1.35 )	1.06-4.98	3.02 ( 0.59 )	1.59 ( -0.07 )
PUPILLARY LIGHT REFLEX TESTS	1	INVESTIGATIONS	5198.29 ( 325.11 - 83117.74 )	5197.78 ( 2597.89 )	5195-5200.55	2599.39 ( 255.61 )	11.34 ( 8.99 )
COLD SWEAT	1	SKIN AND SUBCUTANEOUS TISSUE DISORDERS	0.34 ( 0.05 - 2.43 )	0.34 ( 1.26 )	-1.62-2.3	0.34 ( 0.07 )	-1.55 ( -3.21 )
HEART RATE INCREASED	1	INVESTIGATIONS	0.06 ( 0.01 - 0.44 )	0.06 ( 14.3 )	-1.9-2.02	0.06 ( 0.01 )	-4.02 ( -5.69 )
MUSCLE FATIGUE	1	MUSCULOSKELETAL AND CONNECTIVE TISSUE DISORDERS	1.51 ( 0.21 - 10.7 )	1.51 ( 0.17 )	-0.45-3.47	1.51 ( 0.29 )	0.59 ( -1.08 )
INNER EAR DISORDER	1	EAR AND LABYRINTH DISORDERS	5.57 ( 0.78 - 39.56 )	5.57 ( 3.74 )	3.6-7.53	5.56 ( 1.08 )	2.48 ( 0.81 )
MALIGNANT MUSCLE NEOPLASM	1	NEOPLASMS BENIGN, MALIGNANT AND UNSPECIFIED (INCL CYSTS AND POLYPS)	519.83 ( 66.54 - 4061.3 )	519.78 ( 470.71 )	517.72-521.83	472.62 ( 84.62 )	8.88 ( 7.02 )
TOXIC ENCEPHALOPATHY	1	NERVOUS SYSTEM DISORDERS	1.31 ( 0.18 - 9.31 )	1.31 ( 0.07 )	-0.65-3.27	1.31 ( 0.25 )	0.39 ( -1.28 )
BLOOD PRESSURE SYSTOLIC INCREASED	1	INVESTIGATIONS	0.3 ( 0.04 - 2.14 )	0.3 ( 1.62 )	-1.66-2.26	0.3 ( 0.06 )	-1.73 ( -3.4 )
HEART RATE DECREASED	1	INVESTIGATIONS	0.17 ( 0.02 - 1.18 )	0.17 ( 4.19 )	-1.79-2.13	0.17 ( 0.03 )	-2.59 ( -4.26 )
MOVEMENT DISORDER	1	NERVOUS SYSTEM DISORDERS	0.19 ( 0.03 - 1.31 )	0.19 ( 3.59 )	-1.77-2.15	0.19 ( 0.04 )	-2.43 ( -4.1 )
PREMATURE DELIVERY	1	PREGNANCY, PUERPERIUM AND PERINATAL CONDITIONS	0.37 ( 0.05 - 2.66 )	0.37 ( 1.04 )	-1.59-2.33	0.37 ( 0.07 )	-1.42 ( -3.08 )
EYE SWELLING	1	EYE DISORDERS	0.17 ( 0.02 - 1.2 )	0.17 ( 4.09 )	-1.79-2.13	0.17 ( 0.03 )	-2.57 ( -4.23 )
RETINAL DEGENERATION	1	EYE DISORDERS	4.26 ( 0.6 - 30.3 )	4.26 ( 2.5 )	2.3-6.22	4.26 ( 0.83 )	2.09 ( 0.42 )
CHEST X-RAY ABNORMAL	1	INVESTIGATIONS	1.78 ( 0.25 - 12.63 )	1.78 ( 0.34 )	-0.18-3.74	1.78 ( 0.34 )	0.83 ( -0.84 )
PARANASAL SINUS DISCOMFORT	1	RESPIRATORY, THORACIC AND MEDIASTINAL DISORDERS	1.78 ( 0.25 - 12.66 )	1.78 ( 0.34 )	-0.18-3.74	1.78 ( 0.35 )	0.83 ( -0.83 )
SINUS PAIN	1	RESPIRATORY, THORACIC AND MEDIASTINAL DISORDERS	2.83 ( 0.4 - 20.07 )	2.82 ( 1.18 )	0.86-4.79	2.82 ( 0.55 )	1.5 ( -0.17 )
GASTROINTESTINAL INFLAMMATION	1	GASTROINTESTINAL DISORDERS	0.82 ( 0.12 - 5.83 )	0.82 ( 0.04 )	-1.14-2.78	0.82 ( 0.16 )	-0.28 ( -1.95 )
CHRONIC OBSTRUCTIVE PULMONARY DISEASE	1	RESPIRATORY, THORACIC AND MEDIASTINAL DISORDERS	0.11 ( 0.02 - 0.81 )	0.11 ( 6.86 )	-1.85-2.07	0.11 ( 0.02 )	-3.13 ( -4.79 )
SUPERIOR VENA CAVA SYNDROME	1	VASCULAR DISORDERS	9.77 ( 1.37 - 69.5 )	9.77 ( 7.86 )	7.81-11.73	9.75 ( 1.89 )	3.29 ( 1.62 )
WRONG DOSE	1	INJURY, POISONING AND PROCEDURAL COMPLICATIONS	2.85 ( 0.4 - 20.21 )	2.84 ( 1.2 )	0.88-4.81	2.84 ( 0.55 )	1.51 ( -0.16 )
GUILLAIN-BARRE SYNDROME	1	NERVOUS SYSTEM DISORDERS	1.33 ( 0.19 - 9.43 )	1.33 ( 0.08 )	-0.63-3.29	1.33 ( 0.26 )	0.41 ( -1.26 )
APHERESIS	1	SURGICAL AND MEDICAL PROCEDURES	157.52 ( 21.54 - 1151.88 )	157.51 ( 150.94 )	155.52-159.5	152.91 ( 28.94 )	7.26 ( 5.52 )
DERMATITIS BULLOUS	1	SKIN AND SUBCUTANEOUS TISSUE DISORDERS	0.86 ( 0.12 - 6.08 )	0.86 ( 0.02 )	-1.1-2.82	0.86 ( 0.17 )	-0.22 ( -1.89 )
MALIGNANT MELANOMA	1	NEOPLASMS BENIGN, MALIGNANT AND UNSPECIFIED (INCL CYSTS AND POLYPS)	0.45 ( 0.06 - 3.2 )	0.45 ( 0.67 )	-1.51-2.41	0.45 ( 0.09 )	-1.15 ( -2.82 )
HIRSUTISM	1	SKIN AND SUBCUTANEOUS TISSUE DISORDERS	4.44 ( 0.62 - 31.52 )	4.43 ( 2.66 )	2.47-6.4	4.43 ( 0.86 )	2.15 ( 0.48 )
EYE OPACITY	1	EYE DISORDERS	77.59 ( 10.77 - 558.95 )	77.58 ( 74.48 )	75.6-79.55	76.45 ( 14.65 )	6.26 ( 4.55 )
PNEUMOMEDIASTINUM	1	RESPIRATORY, THORACIC AND MEDIASTINAL DISORDERS	3.78 ( 0.53 - 26.86 )	3.78 ( 2.04 )	1.82-5.74	3.78 ( 0.73 )	1.92 ( 0.25 )
DENTAL CARIES	1	GASTROINTESTINAL DISORDERS	0.54 ( 0.08 - 3.82 )	0.54 ( 0.4 )	-1.42-2.5	0.54 ( 0.1 )	-0.89 ( -2.56 )
COATING IN MOUTH	1	GASTROINTESTINAL DISORDERS	12.09 ( 1.7 - 86.03 )	12.09 ( 10.15 )	10.13-14.05	12.06 ( 2.34 )	3.59 ( 1.92 )
PANCREAS TRANSPLANT REJECTION	1	IMMUNE SYSTEM DISORDERS	31.5 ( 4.41 - 225.01 )	31.5 ( 29.36 )	29.54-33.47	31.32 ( 6.04 )	4.97 ( 3.29 )
COLON CANCER	1	NEOPLASMS BENIGN, MALIGNANT AND UNSPECIFIED (INCL CYSTS AND POLYPS)	0.4 ( 0.06 - 2.84 )	0.4 ( 0.9 )	-1.56-2.36	0.4 ( 0.08 )	-1.32 ( -2.99 )
DRY MOUTH	1	GASTROINTESTINAL DISORDERS	0.08 ( 0.01 - 0.55 )	0.08 ( 11.06 )	-1.88-2.04	0.08 ( 0.01 )	-3.7 ( -5.36 )
ABSCESS LIMB	1	INFECTIONS AND INFESTATIONS	1.46 ( 0.21 - 10.38 )	1.46 ( 0.15 )	-0.5-3.42	1.46 ( 0.28 )	0.55 ( -1.12 )
CHROMATURIA	1	RENAL AND URINARY DISORDERS	0.26 ( 0.04 - 1.83 )	0.26 ( 2.14 )	-1.7-2.22	0.26 ( 0.05 )	-1.96 ( -3.62 )
HEPATIC INFECTION	1	INFECTIONS AND INFESTATIONS	4.99 ( 0.7 - 35.49 )	4.99 ( 3.19 )	3.03-6.95	4.99 ( 0.97 )	2.32 ( 0.65 )
PARADOXICAL DRUG REACTION	1	GENERAL DISORDERS AND ADMINISTRATION SITE CONDITIONS	1.75 ( 0.25 - 12.43 )	1.75 ( 0.32 )	-0.21-3.71	1.75 ( 0.34 )	0.81 ( -0.86 )
VULVAL CANCER	1	NEOPLASMS BENIGN, MALIGNANT AND UNSPECIFIED (INCL CYSTS AND POLYPS)	10.07 ( 1.42 - 71.66 )	10.07 ( 8.16 )	8.11-12.04	10.06 ( 1.95 )	3.33 ( 1.66 )
VISUAL ACUITY REDUCED	1	EYE DISORDERS	0.17 ( 0.02 - 1.18 )	0.17 ( 4.18 )	-1.79-2.13	0.17 ( 0.03 )	-2.59 ( -4.25 )
RHONCHI	1	RESPIRATORY, THORACIC AND MEDIASTINAL DISORDERS	4.23 ( 0.6 - 30.08 )	4.23 ( 2.47 )	2.27-6.19	4.23 ( 0.82 )	2.08 ( 0.41 )
SINUS CONGESTION	1	RESPIRATORY, THORACIC AND MEDIASTINAL DISORDERS	0.45 ( 0.06 - 3.17 )	0.45 ( 0.69 )	-1.51-2.41	0.45 ( 0.09 )	-1.16 ( -2.83 )
DEVICE RELATED THROMBOSIS	1	GENERAL DISORDERS AND ADMINISTRATION SITE CONDITIONS	6.08 ( 0.86 - 43.22 )	6.08 ( 4.24 )	4.12-8.04	6.07 ( 1.18 )	2.6 ( 0.93 )
CHRONIC GRAFT VERSUS HOST DISEASE IN SKIN	1	IMMUNE SYSTEM DISORDERS	7.5 ( 1.05 - 53.33 )	7.5 ( 5.63 )	5.54-9.46	7.49 ( 1.45 )	2.91 ( 1.24 )
THINKING ABNORMAL	1	PSYCHIATRIC DISORDERS	0.31 ( 0.04 - 2.2 )	0.31 ( 1.54 )	-1.65-2.27	0.31 ( 0.06 )	-1.69 ( -3.36 )
INAPPROPRIATE AFFECT	1	PSYCHIATRIC DISORDERS	3.58 ( 0.5 - 25.44 )	3.58 ( 1.86 )	1.62-5.54	3.58 ( 0.69 )	1.84 ( 0.17 )
COMMUNICATION DISORDER	1	PSYCHIATRIC DISORDERS	1.57 ( 0.22 - 11.18 )	1.57 ( 0.21 )	-0.39-3.53	1.57 ( 0.31 )	0.65 ( -1.01 )
SENSITIVE SKIN	1	SKIN AND SUBCUTANEOUS TISSUE DISORDERS	1.04 ( 0.15 - 7.36 )	1.04 ( 0 )	-0.92-3	1.04 ( 0.2 )	0.05 ( -1.62 )
SKIN FRAGILITY	1	SKIN AND SUBCUTANEOUS TISSUE DISORDERS	2.3 ( 0.32 - 16.35 )	2.3 ( 0.74 )	0.34-4.26	2.3 ( 0.45 )	1.2 ( -0.46 )
GINGIVITIS ULCERATIVE	1	GASTROINTESTINAL DISORDERS	31.89 ( 4.46 - 227.79 )	31.89 ( 29.74 )	29.92-33.85	31.7 ( 6.12 )	4.99 ( 3.31 )
CHRONIC LYMPHOCYTIC LEUKAEMIA	1	NEOPLASMS BENIGN, MALIGNANT AND UNSPECIFIED (INCL CYSTS AND POLYPS)	1.33 ( 0.19 - 9.43 )	1.33 ( 0.08 )	-0.63-3.29	1.33 ( 0.26 )	0.41 ( -1.26 )
BLOOD ELECTROLYTES ABNORMAL	1	INVESTIGATIONS	4.86 ( 0.68 - 34.52 )	4.86 ( 3.06 )	2.9-6.82	4.85 ( 0.94 )	2.28 ( 0.61 )
LYMPHOMA TRANSFORMATION	1	NEOPLASMS BENIGN, MALIGNANT AND UNSPECIFIED (INCL CYSTS AND POLYPS)	23 ( 3.23 - 164.02 )	23 ( 20.95 )	21.03-24.96	22.9 ( 4.43 )	4.52 ( 2.84 )
SEASONAL ALLERGY	1	IMMUNE SYSTEM DISORDERS	0.47 ( 0.07 - 3.33 )	0.47 ( 0.6 )	-1.49-2.43	0.47 ( 0.09 )	-1.09 ( -2.76 )
BURKITT'S LYMPHOMA	1	NEOPLASMS BENIGN, MALIGNANT AND UNSPECIFIED (INCL CYSTS AND POLYPS)	11.79 ( 1.66 - 83.88 )	11.79 ( 9.85 )	9.82-13.75	11.76 ( 2.28 )	3.56 ( 1.88 )
DRUG ERUPTION	1	SKIN AND SUBCUTANEOUS TISSUE DISORDERS	0.36 ( 0.05 - 2.56 )	0.36 ( 1.13 )	-1.6-2.32	0.36 ( 0.07 )	-1.47 ( -3.14 )
INFECTIOUS PLEURAL EFFUSION	1	INFECTIONS AND INFESTATIONS	4.14 ( 0.58 - 29.41 )	4.14 ( 2.38 )	2.18-6.1	4.14 ( 0.8 )	2.05 ( 0.38 )
NEUROLOGICAL DECOMPENSATION	1	NERVOUS SYSTEM DISORDERS	2.82 ( 0.4 - 20.01 )	2.82 ( 1.17 )	0.86-4.78	2.82 ( 0.55 )	1.49 ( -0.17 )
MACULAR FIBROSIS	1	EYE DISORDERS	7.82 ( 1.1 - 55.58 )	7.82 ( 5.94 )	5.85-9.78	7.81 ( 1.51 )	2.96 ( 1.29 )
DISSEMINATED CRYPTOCOCCOSIS	1	INFECTIONS AND INFESTATIONS	10.25 ( 1.44 - 72.94 )	10.25 ( 8.33 )	8.29-12.21	10.23 ( 1.98 )	3.36 ( 1.68 )
PNEUMONIA CRYPTOCOCCAL	1	INFECTIONS AND INFESTATIONS	7.16 ( 1.01 - 50.91 )	7.16 ( 5.29 )	5.2-9.12	7.15 ( 1.39 )	2.84 ( 1.17 )
ANORECTAL VARICES	1	GASTROINTESTINAL DISORDERS	162.45 ( 22.19 - 1188.96 )	162.43 ( 155.58 )	160.44-164.42	157.54 ( 29.79 )	7.3 ( 5.56 )
ISOSPORIASIS	1	INFECTIONS AND INFESTATIONS	71.21 ( 9.9 - 512.4 )	71.2 ( 68.28 )	69.23-73.18	70.25 ( 13.48 )	6.13 ( 4.44 )
KIDNEY FIBROSIS	1	RENAL AND URINARY DISORDERS	3.35 ( 0.47 - 23.83 )	3.35 ( 1.65 )	1.39-5.31	3.35 ( 0.65 )	1.74 ( 0.08 )
RENAL TUBULAR ATROPHY	1	RENAL AND URINARY DISORDERS	6.89 ( 0.97 - 48.95 )	6.88 ( 5.02 )	4.92-8.85	6.88 ( 1.33 )	2.78 ( 1.11 )
BIPOLAR DISORDER	1	PSYCHIATRIC DISORDERS	0.53 ( 0.07 - 3.76 )	0.53 ( 0.42 )	-1.43-2.49	0.53 ( 0.1 )	-0.92 ( -2.58 )
HYPERLACTACIDAEMIA	1	METABOLISM AND NUTRITION DISORDERS	2.58 ( 0.36 - 18.34 )	2.58 ( 0.97 )	0.62-4.54	2.58 ( 0.5 )	1.37 ( -0.3 )
HYPERAMMONAEMIA	1	METABOLISM AND NUTRITION DISORDERS	1.25 ( 0.18 - 8.84 )	1.24 ( 0.05 )	-0.72-3.21	1.24 ( 0.24 )	0.32 ( -1.35 )
POSTERIOR REVERSIBLE ENCEPHALOPATHY SYNDROME	1	NERVOUS SYSTEM DISORDERS	0.63 ( 0.09 - 4.45 )	0.63 ( 0.22 )	-1.33-2.59	0.63 ( 0.12 )	-0.68 ( -2.34 )
STEROID DIABETES	1	METABOLISM AND NUTRITION DISORDERS	5.22 ( 0.73 - 37.09 )	5.22 ( 3.41 )	3.26-7.18	5.21 ( 1.01 )	2.38 ( 0.71 )
TYPE 1 DIABETES MELLITUS	1	METABOLISM AND NUTRITION DISORDERS	0.96 ( 0.14 - 6.81 )	0.96 ( 0 )	-1-2.92	0.96 ( 0.19 )	-0.06 ( -1.73 )
UREAPLASMA INFECTION	1	INFECTIONS AND INFESTATIONS	19.25 ( 2.7 - 137.19 )	19.25 ( 17.24 )	17.29-21.21	19.18 ( 3.71 )	4.26 ( 2.59 )
BLADDER TUMOUR ANTIGEN	1	INVESTIGATIONS	Inf ( NaN - Inf )	Inf ( 5197.78 )	#VALUE!	5198.78 ( 0 )	12.34 ( 9.71 )
BACTERIAL PYELONEPHRITIS	1	INFECTIONS AND INFESTATIONS	18.97 ( 2.66 - 135.18 )	18.97 ( 16.96 )	17.01-20.93	18.9 ( 3.66 )	4.24 ( 2.57 )
BLOOD GLUCOSE FLUCTUATION	1	INVESTIGATIONS	0.54 ( 0.08 - 3.84 )	0.54 ( 0.39 )	-1.42-2.5	0.54 ( 0.1 )	-0.89 ( -2.55 )
ESCHERICHIA PYELONEPHRITIS	1	INFECTIONS AND INFESTATIONS	29.88 ( 4.18 - 213.31 )	29.87 ( 27.75 )	27.91-31.84	29.71 ( 5.74 )	4.89 ( 3.21 )
IRON DEFICIENCY	1	METABOLISM AND NUTRITION DISORDERS	1.44 ( 0.2 - 10.25 )	1.44 ( 0.14 )	-0.52-3.4	1.44 ( 0.28 )	0.53 ( -1.14 )
ORAL DYSAESTHESIA	1	GASTROINTESTINAL DISORDERS	29.54 ( 4.14 - 210.87 )	29.53 ( 27.41 )	27.57-31.5	29.37 ( 5.67 )	4.88 ( 3.2 )
WOUND DEHISCENCE	1	INJURY, POISONING AND PROCEDURAL COMPLICATIONS	1.74 ( 0.24 - 12.34 )	1.74 ( 0.31 )	-0.22-3.7	1.74 ( 0.34 )	0.8 ( -0.87 )
PROCEDURAL COMPLICATION	1	INJURY, POISONING AND PROCEDURAL COMPLICATIONS	0.74 ( 0.1 - 5.26 )	0.74 ( 0.09 )	-1.22-2.7	0.74 ( 0.14 )	-0.43 ( -2.1 )
OESOPHAGEAL CARCINOMA	1	NEOPLASMS BENIGN, MALIGNANT AND UNSPECIFIED (INCL CYSTS AND POLYPS)	0.18 ( 0.03 - 1.26 )	0.18 ( 3.8 )	-1.78-2.14	0.18 ( 0.03 )	-2.49 ( -4.16 )
MUSCLE STRAIN	1	INJURY, POISONING AND PROCEDURAL COMPLICATIONS	0.69 ( 0.1 - 4.9 )	0.69 ( 0.14 )	-1.27-2.65	0.69 ( 0.13 )	-0.53 ( -2.2 )
MYCOBACTERIUM ABSCESSUS INFECTION	1	INFECTIONS AND INFESTATIONS	10.13 ( 1.42 - 72.08 )	10.13 ( 8.21 )	8.17-12.09	10.11 ( 1.96 )	3.34 ( 1.67 )
RASH ERYTHEMATOUS	1	SKIN AND SUBCUTANEOUS TISSUE DISORDERS	0.15 ( 0.02 - 1.04 )	0.15 ( 4.96 )	-1.81-2.11	0.15 ( 0.03 )	-2.77 ( -4.43 )
PROTEINURIA	1	RENAL AND URINARY DISORDERS	0.34 ( 0.05 - 2.42 )	0.34 ( 1.28 )	-1.62-2.3	0.34 ( 0.07 )	-1.55 ( -3.22 )
APPARENT DEATH	1	GENERAL DISORDERS AND ADMINISTRATION SITE CONDITIONS	1.46 ( 0.21 - 10.34 )	1.46 ( 0.14 )	-0.5-3.42	1.46 ( 0.28 )	0.54 ( -1.12 )
DIARRHOEA HAEMORRHAGIC	1	GASTROINTESTINAL DISORDERS	0.65 ( 0.09 - 4.59 )	0.65 ( 0.19 )	-1.31-2.61	0.65 ( 0.13 )	-0.63 ( -2.3 )
HYPOVOLAEMIC SHOCK	1	VASCULAR DISORDERS	1.3 ( 0.18 - 9.24 )	1.3 ( 0.07 )	-0.66-3.26	1.3 ( 0.25 )	0.38 ( -1.29 )
GENITAL ULCERATION	1	REPRODUCTIVE SYSTEM AND BREAST DISORDERS	9.57 ( 1.35 - 68.09 )	9.57 ( 7.66 )	7.61-11.53	9.56 ( 1.85 )	3.26 ( 1.59 )
ACUTE BIPHENOTYPIC LEUKAEMIA	1	NEOPLASMS BENIGN, MALIGNANT AND UNSPECIFIED (INCL CYSTS AND POLYPS)	66.64 ( 9.27 - 479.14 )	66.64 ( 63.83 )	64.67-68.61	65.81 ( 12.63 )	6.04 ( 4.34 )
PURPURA	1	SKIN AND SUBCUTANEOUS TISSUE DISORDERS	0.67 ( 0.09 - 4.79 )	0.67 ( 0.16 )	-1.29-2.63	0.67 ( 0.13 )	-0.57 ( -2.24 )
HYPERVOLAEMIA	1	METABOLISM AND NUTRITION DISORDERS	0.3 ( 0.04 - 2.13 )	0.3 ( 1.63 )	-1.66-2.26	0.3 ( 0.06 )	-1.73 ( -3.4 )
POLYURIA	1	RENAL AND URINARY DISORDERS	0.74 ( 0.1 - 5.22 )	0.74 ( 0.09 )	-1.22-2.7	0.74 ( 0.14 )	-0.44 ( -2.11 )
HYPERTRICHOSIS	1	SKIN AND SUBCUTANEOUS TISSUE DISORDERS	3 ( 0.42 - 21.35 )	3 ( 1.34 )	1.04-4.96	3 ( 0.58 )	1.59 ( -0.08 )
HEPATIC HYPERTROPHY	1	HEPATOBILIARY DISORDERS	226.01 ( 30.52 - 1673.78 )	225.99 ( 214.66 )	223.99-227.99	216.62 ( 40.56 )	7.76 ( 6 )
RED BLOOD CELL TRANSFUSION	1	SURGICAL AND MEDICAL PROCEDURES	3.47 ( 0.49 - 24.65 )	3.47 ( 1.76 )	1.51-5.43	3.47 ( 0.67 )	1.79 ( 0.13 )
GENITAL BURNING SENSATION	1	REPRODUCTIVE SYSTEM AND BREAST DISORDERS	7.28 ( 1.02 - 51.76 )	7.28 ( 5.41 )	5.32-9.24	7.27 ( 1.41 )	2.86 ( 1.19 )
MIDDLE INSOMNIA	1	PSYCHIATRIC DISORDERS	0.34 ( 0.05 - 2.39 )	0.34 ( 1.3 )	-1.62-2.3	0.34 ( 0.07 )	-1.57 ( -3.23 )
TINNITUS	1	EAR AND LABYRINTH DISORDERS	0.13 ( 0.02 - 0.94 )	0.13 ( 5.67 )	-1.83-2.09	0.13 ( 0.03 )	-2.91 ( -4.58 )
BUNDLE BRANCH BLOCK RIGHT	1	CARDIAC DISORDERS	1.24 ( 0.18 - 8.83 )	1.24 ( 0.05 )	-0.72-3.2	1.24 ( 0.24 )	0.31 ( -1.35 )
HYPERMAGNESAEMIA	1	METABOLISM AND NUTRITION DISORDERS	9.79 ( 1.38 - 69.63 )	9.79 ( 7.88 )	7.83-11.75	9.77 ( 1.89 )	3.29 ( 1.62 )
MENINGITIS FUNGAL	1	INFECTIONS AND INFESTATIONS	25.61 ( 3.59 - 182.69 )	25.6 ( 23.53 )	23.64-27.57	25.48 ( 4.92 )	4.67 ( 2.99 )
BLOOD CREATININE ABNORMAL	1	INVESTIGATIONS	1.86 ( 0.26 - 13.19 )	1.86 ( 0.39 )	-0.1-3.82	1.86 ( 0.36 )	0.89 ( -0.77 )
BLOOD MAGNESIUM DECREASED	1	INVESTIGATIONS	0.72 ( 0.1 - 5.14 )	0.72 ( 0.1 )	-1.24-2.68	0.72 ( 0.14 )	-0.47 ( -2.13 )
BIOPSY	1	INVESTIGATIONS	6.81 ( 0.96 - 48.43 )	6.81 ( 4.95 )	4.85-8.77	6.8 ( 1.32 )	2.77 ( 1.1 )
GASTRIC INFECTION	1	INFECTIONS AND INFESTATIONS	1.63 ( 0.23 - 11.55 )	1.63 ( 0.24 )	-0.33-3.59	1.63 ( 0.32 )	0.7 ( -0.97 )
HEPATIC RUPTURE	1	INJURY, POISONING AND PROCEDURAL COMPLICATIONS	28.41 ( 3.98 - 202.76 )	28.4 ( 26.29 )	26.44-30.37	28.25 ( 5.46 )	4.82 ( 3.14 )
NEUTROPHILIA	1	BLOOD AND LYMPHATIC SYSTEM DISORDERS	1.18 ( 0.17 - 8.41 )	1.18 ( 0.03 )	-0.78-3.14	1.18 ( 0.23 )	0.24 ( -1.42 )
RETINAL ARTERY OCCLUSION	1	EYE DISORDERS	2.58 ( 0.36 - 18.34 )	2.58 ( 0.97 )	0.62-4.54	2.58 ( 0.5 )	1.37 ( -0.3 )
CERVICITIS	1	INFECTIONS AND INFESTATIONS	13.61 ( 1.91 - 96.87 )	13.61 ( 11.65 )	11.64-15.57	13.57 ( 2.63 )	3.76 ( 2.09 )
TERMINAL STATE	1	GENERAL DISORDERS AND ADMINISTRATION SITE CONDITIONS	0.9 ( 0.13 - 6.41 )	0.9 ( 0.01 )	-1.06-2.86	0.9 ( 0.17 )	-0.15 ( -1.81 )
HYPERAEMIA	1	VASCULAR DISORDERS	3.1 ( 0.44 - 22.02 )	3.1 ( 1.42 )	1.14-5.06	3.1 ( 0.6 )	1.63 ( -0.04 )
HIATUS HERNIA	1	GASTROINTESTINAL DISORDERS	0.45 ( 0.06 - 3.19 )	0.45 ( 0.67 )	-1.51-2.41	0.45 ( 0.09 )	-1.15 ( -2.82 )
NOCTURIA	1	RENAL AND URINARY DISORDERS	0.52 ( 0.07 - 3.72 )	0.52 ( 0.43 )	-1.44-2.48	0.52 ( 0.1 )	-0.93 ( -2.6 )
SLEEP APNOEA SYNDROME	1	RESPIRATORY, THORACIC AND MEDIASTINAL DISORDERS	0.3 ( 0.04 - 2.16 )	0.3 ( 1.6 )	-1.66-2.26	0.3 ( 0.06 )	-1.72 ( -3.39 )
SPIROMETRY ABNORMAL	1	INVESTIGATIONS	12.15 ( 1.71 - 86.43 )	12.14 ( 10.2 )	10.18-14.11	12.12 ( 2.35 )	3.6 ( 1.93 )
INFERTILITY MALE	1	REPRODUCTIVE SYSTEM AND BREAST DISORDERS	12.68 ( 1.78 - 90.23 )	12.68 ( 10.73 )	10.72-14.64	12.65 ( 2.45 )	3.66 ( 1.99 )
TONIC CLONIC MOVEMENTS	1	NERVOUS SYSTEM DISORDERS	4.76 ( 0.67 - 33.8 )	4.76 ( 2.96 )	2.79-6.72	4.75 ( 0.92 )	2.25 ( 0.58 )
DIASTOLIC DYSFUNCTION	1	CARDIAC DISORDERS	1.95 ( 0.27 - 13.85 )	1.95 ( 0.46 )	-0.01-3.91	1.95 ( 0.38 )	0.96 ( -0.7 )
SCAB	1	SKIN AND SUBCUTANEOUS TISSUE DISORDERS	0.55 ( 0.08 - 3.92 )	0.55 ( 0.36 )	-1.41-2.51	0.55 ( 0.11 )	-0.86 ( -2.53 )
SKIN PAPILLOMA	1	NEOPLASMS BENIGN, MALIGNANT AND UNSPECIFIED (INCL CYSTS AND POLYPS)	1.5 ( 0.21 - 10.62 )	1.5 ( 0.16 )	-0.46-3.46	1.5 ( 0.29 )	0.58 ( -1.09 )
CRYSTALLURIA	1	RENAL AND URINARY DISORDERS	12.41 ( 1.74 - 88.29 )	12.41 ( 10.46 )	10.44-14.37	12.38 ( 2.4 )	3.63 ( 1.96 )
LEUKOCYTOSIS	1	BLOOD AND LYMPHATIC SYSTEM DISORDERS	0.34 ( 0.05 - 2.41 )	0.34 ( 1.28 )	-1.62-2.3	0.34 ( 0.07 )	-1.56 ( -3.22 )
CEREBRAL VENTRICLE COLLAPSE	1	INJURY, POISONING AND PROCEDURAL COMPLICATIONS	77.59 ( 10.77 - 558.95 )	77.58 ( 74.48 )	75.6-79.55	76.45 ( 14.65 )	6.26 ( 4.55 )
ONYCHOMYCOSIS	1	INFECTIONS AND INFESTATIONS	1.56 ( 0.22 - 11.07 )	1.56 ( 0.2 )	-0.4-3.52	1.56 ( 0.3 )	0.64 ( -1.03 )
MYOPIA	1	EYE DISORDERS	2.51 ( 0.35 - 17.8 )	2.51 ( 0.9 )	0.55-4.47	2.51 ( 0.49 )	1.33 ( -0.34 )
CHRONIC GRAFT VERSUS HOST DISEASE IN EYE	1	IMMUNE SYSTEM DISORDERS	39.99 ( 5.59 - 286.05 )	39.98 ( 37.72 )	38.02-41.95	39.69 ( 7.65 )	5.31 ( 3.63 )
SCLERODERMA	1	MUSCULOSKELETAL AND CONNECTIVE TISSUE DISORDERS	1.61 ( 0.23 - 11.47 )	1.61 ( 0.23 )	-0.35-3.57	1.61 ( 0.31 )	0.69 ( -0.98 )
ACUTE GRAFT VERSUS HOST DISEASE IN INTESTINE	1	IMMUNE SYSTEM DISORDERS	4.64 ( 0.65 - 32.98 )	4.64 ( 2.85 )	2.68-6.6	4.64 ( 0.9 )	2.21 ( 0.55 )
POLYOMAVIRUS VIRAEMIA	1	INFECTIONS AND INFESTATIONS	8.8 ( 1.24 - 62.55 )	8.79 ( 6.9 )	6.83-10.76	8.78 ( 1.7 )	3.13 ( 1.46 )
PLATELET COUNT INCREASED	1	INVESTIGATIONS	0.46 ( 0.06 - 3.25 )	0.46 ( 0.64 )	-1.5-2.42	0.46 ( 0.09 )	-1.13 ( -2.79 )
OCULAR HYPERTENSION	1	EYE DISORDERS	3.51 ( 0.49 - 24.94 )	3.51 ( 1.79 )	1.55-5.47	3.51 ( 0.68 )	1.81 ( 0.14 )
RENAL INJURY	1	RENAL AND URINARY DISORDERS	0.18 ( 0.03 - 1.29 )	0.18 ( 3.68 )	-1.78-2.14	0.18 ( 0.04 )	-2.46 ( -4.12 )
CHRONIC LYMPHOCYTIC INFLAMMATION WITH PONTINE PERIVASCULAR ENHANCEMENT RESPONSIVE TO STEROIDS	1	NERVOUS SYSTEM DISORDERS	346.55 ( 45.77 - 2623.88 )	346.52 ( 322.99 )	344.49-348.54	324.92 ( 59.72 )	8.34 ( 6.54 )
BONE DENSITY DECREASED	1	INVESTIGATIONS	0.18 ( 0.02 - 1.26 )	0.18 ( 3.82 )	-1.78-2.14	0.18 ( 0.03 )	-2.5 ( -4.16 )
HEART TRANSPLANT	1	SURGICAL AND MEDICAL PROCEDURES	6.97 ( 0.98 - 49.54 )	6.97 ( 5.1 )	5.01-8.93	6.96 ( 1.35 )	2.8 ( 1.13 )
CEREBRAL CALCIFICATION	1	NERVOUS SYSTEM DISORDERS	19.04 ( 2.67 - 135.68 )	19.04 ( 17.03 )	17.08-21	18.97 ( 3.67 )	4.25 ( 2.57 )
HYPOTONIA	1	NERVOUS SYSTEM DISORDERS	0.59 ( 0.08 - 4.2 )	0.59 ( 0.28 )	-1.37-2.55	0.59 ( 0.11 )	-0.76 ( -2.42 )
POOR QUALITY SLEEP	1	PSYCHIATRIC DISORDERS	0.29 ( 0.04 - 2.08 )	0.29 ( 1.7 )	-1.67-2.25	0.29 ( 0.06 )	-1.77 ( -3.43 )
FLATULENCE	1	GASTROINTESTINAL DISORDERS	0.11 ( 0.02 - 0.78 )	0.11 ( 7.24 )	-1.85-2.07	0.11 ( 0.02 )	-3.19 ( -4.86 )
PRODUCT TEMPERATURE EXCURSION ISSUE	1	PRODUCT ISSUES	2.22 ( 0.31 - 15.76 )	2.22 ( 0.67 )	0.26-4.18	2.22 ( 0.43 )	1.15 ( -0.52 )
DUODENITIS	1	GASTROINTESTINAL DISORDERS	1.95 ( 0.27 - 13.86 )	1.95 ( 0.46 )	-0.01-3.91	1.95 ( 0.38 )	0.96 ( -0.7 )
GASTRIC FISTULA	1	GASTROINTESTINAL DISORDERS	15.2 ( 2.13 - 108.23 )	15.2 ( 13.23 )	13.24-17.16	15.16 ( 2.93 )	3.92 ( 2.25 )
OESOPHAGEAL ULCER	1	GASTROINTESTINAL DISORDERS	1.54 ( 0.22 - 10.95 )	1.54 ( 0.19 )	-0.42-3.5	1.54 ( 0.3 )	0.62 ( -1.04 )
OESOPHAGOPLEURAL FISTULA	1	GASTROINTESTINAL DISORDERS	185.65 ( 25.26 - 1364.67 )	185.63 ( 177.31 )	183.64-187.63	179.27 ( 33.78 )	7.49 ( 5.74 )
PSEUDOMONAL BACTERAEMIA	1	INFECTIONS AND INFESTATIONS	8.08 ( 1.14 - 57.49 )	8.08 ( 6.2 )	6.12-10.05	8.07 ( 1.56 )	3.01 ( 1.34 )
PULMONARY ARTERIAL HYPERTENSION	1	RESPIRATORY, THORACIC AND MEDIASTINAL DISORDERS	0.4 ( 0.06 - 2.85 )	0.4 ( 0.89 )	-1.56-2.36	0.4 ( 0.08 )	-1.32 ( -2.98 )
HEPATITIS E	1	INFECTIONS AND INFESTATIONS	4.03 ( 0.57 - 28.61 )	4.03 ( 2.27 )	2.07-5.99	4.02 ( 0.78 )	2.01 ( 0.34 )
NEPHRITIS	1	RENAL AND URINARY DISORDERS	1.96 ( 0.28 - 13.91 )	1.96 ( 0.47 )	0-3.92	1.96 ( 0.38 )	0.97 ( -0.7 )
TONIC CONVULSION	1	NERVOUS SYSTEM DISORDERS	4.84 ( 0.68 - 34.4 )	4.84 ( 3.04 )	2.88-6.8	4.84 ( 0.94 )	2.27 ( 0.61 )
BREATH SOUNDS ABNORMAL	1	INVESTIGATIONS	1.24 ( 0.17 - 8.81 )	1.24 ( 0.05 )	-0.72-3.2	1.24 ( 0.24 )	0.31 ( -1.36 )
JUVENILE IDIOPATHIC ARTHRITIS	1	MUSCULOSKELETAL AND CONNECTIVE TISSUE DISORDERS	2.21 ( 0.31 - 15.72 )	2.21 ( 0.66 )	0.25-4.17	2.21 ( 0.43 )	1.15 ( -0.52 )
SPINAL CORD COMPRESSION	1	NERVOUS SYSTEM DISORDERS	1.52 ( 0.21 - 10.79 )	1.52 ( 0.18 )	-0.44-3.48	1.52 ( 0.29 )	0.6 ( -1.06 )
ALPHA HAEMOLYTIC STREPTOCOCCAL INFECTION	1	INFECTIONS AND INFESTATIONS	6.86 ( 0.96 - 48.75 )	6.86 ( 5 )	4.9-8.82	6.85 ( 1.33 )	2.78 ( 1.11 )
EYE INFECTION	1	INFECTIONS AND INFESTATIONS	0.57 ( 0.08 - 4.07 )	0.57 ( 0.32 )	-1.39-2.53	0.57 ( 0.11 )	-0.8 ( -2.47 )
INFUSION SITE CELLULITIS	1	INFECTIONS AND INFESTATIONS	15.11 ( 2.12 - 107.6 )	15.11 ( 13.14 )	13.15-17.07	15.07 ( 2.92 )	3.91 ( 2.24 )
GLOMERULONEPHROPATHY	1	RENAL AND URINARY DISORDERS	22.21 ( 3.12 - 158.39 )	22.21 ( 20.17 )	20.25-24.18	22.12 ( 4.28 )	4.47 ( 2.79 )
TRANSMISSION OF AN INFECTIOUS AGENT VIA PRODUCT	1	INFECTIONS AND INFESTATIONS	5.13 ( 0.72 - 36.43 )	5.13 ( 3.32 )	3.17-7.09	5.12 ( 0.99 )	2.36 ( 0.69 )
T-CELL LYMPHOMA	1	NEOPLASMS BENIGN, MALIGNANT AND UNSPECIFIED (INCL CYSTS AND POLYPS)	5.81 ( 0.82 - 41.28 )	5.81 ( 3.98 )	3.85-7.77	5.8 ( 1.12 )	2.54 ( 0.87 )
THROMBOTIC THROMBOCYTOPENIC PURPURA	1	BLOOD AND LYMPHATIC SYSTEM DISORDERS	1.66 ( 0.23 - 11.76 )	1.66 ( 0.26 )	-0.3-3.62	1.66 ( 0.32 )	0.73 ( -0.94 )
LIP AND/OR ORAL CAVITY CANCER	1	NEOPLASMS BENIGN, MALIGNANT AND UNSPECIFIED (INCL CYSTS AND POLYPS)	4.26 ( 0.6 - 30.3 )	4.26 ( 2.5 )	2.3-6.22	4.26 ( 0.83 )	2.09 ( 0.42 )
EPSTEIN-BARR VIRUS INFECTION REACTIVATION	1	INFECTIONS AND INFESTATIONS	7.31 ( 1.03 - 51.98 )	7.31 ( 5.44 )	5.35-9.27	7.3 ( 1.41 )	2.87 ( 1.2 )
RIB FRACTURE	1	INJURY, POISONING AND PROCEDURAL COMPLICATIONS	0.3 ( 0.04 - 2.1 )	0.3 ( 1.68 )	-1.66-2.26	0.3 ( 0.06 )	-1.76 ( -3.43 )
VITREOUS HAEMORRHAGE	1	EYE DISORDERS	2.2 ( 0.31 - 15.64 )	2.2 ( 0.66 )	0.24-4.16	2.2 ( 0.43 )	1.14 ( -0.53 )
NASAL SINUS CANCER	1	NEOPLASMS BENIGN, MALIGNANT AND UNSPECIFIED (INCL CYSTS AND POLYPS)	30.58 ( 4.28 - 218.36 )	30.58 ( 28.44 )	28.61-32.54	30.4 ( 5.87 )	4.93 ( 3.25 )
POLYMERASE CHAIN REACTION	1	INVESTIGATIONS	50.47 ( 7.04 - 361.75 )	50.46 ( 48.02 )	48.49-52.43	49.99 ( 9.62 )	5.64 ( 3.95 )
ENDOPHTHALMITIS	1	INFECTIONS AND INFESTATIONS	1.06 ( 0.15 - 7.51 )	1.06 ( 0 )	-0.9-3.02	1.06 ( 0.21 )	0.08 ( -1.59 )
PENICILLIUM INFECTION	1	INFECTIONS AND INFESTATIONS	46.83 ( 6.54 - 335.45 )	46.83 ( 44.45 )	44.86-48.8	46.42 ( 8.94 )	5.54 ( 3.85 )
OROPHARYNGEAL CANDIDIASIS	1	INFECTIONS AND INFESTATIONS	6.58 ( 0.93 - 46.78 )	6.58 ( 4.73 )	4.62-8.54	6.57 ( 1.27 )	2.72 ( 1.05 )
PATERNAL EXPOSURE DURING PREGNANCY	1	INJURY, POISONING AND PROCEDURAL COMPLICATIONS	8.74 ( 1.23 - 62.13 )	8.74 ( 6.84 )	6.77-10.7	8.72 ( 1.69 )	3.12 ( 1.45 )
DERMAL CYST	1	SKIN AND SUBCUTANEOUS TISSUE DISORDERS	2.41 ( 0.34 - 17.14 )	2.41 ( 0.83 )	0.45-4.37	2.41 ( 0.47 )	1.27 ( -0.4 )
PANCREATIC CYST	1	GASTROINTESTINAL DISORDERS	3.44 ( 0.48 - 24.46 )	3.44 ( 1.73 )	1.48-5.4	3.44 ( 0.67 )	1.78 ( 0.11 )
ANASTOMOTIC HAEMORRHAGE	1	INJURY, POISONING AND PROCEDURAL COMPLICATIONS	30.76 ( 4.31 - 219.66 )	30.76 ( 28.62 )	28.79-32.72	30.58 ( 5.9 )	4.93 ( 3.25 )
PRECANCEROUS SKIN LESION	1	SKIN AND SUBCUTANEOUS TISSUE DISORDERS	4.11 ( 0.58 - 29.2 )	4.11 ( 2.35 )	2.15-6.07	4.11 ( 0.8 )	2.04 ( 0.37 )
FEELING DRUNK	1	GENERAL DISORDERS AND ADMINISTRATION SITE CONDITIONS	0.79 ( 0.11 - 5.63 )	0.79 ( 0.05 )	-1.17-2.75	0.79 ( 0.15 )	-0.33 ( -2 )
HERPES DERMATITIS	1	INFECTIONS AND INFESTATIONS	33.98 ( 4.75 - 242.78 )	33.97 ( 31.79 )	32.01-35.94	33.76 ( 6.51 )	5.08 ( 3.39 )
STREPTOCOCCAL INFECTION	1	INFECTIONS AND INFESTATIONS	1.15 ( 0.16 - 8.16 )	1.15 ( 0.02 )	-0.81-3.11	1.15 ( 0.22 )	0.2 ( -1.47 )
SYPHILIS	1	INFECTIONS AND INFESTATIONS	8.61 ( 1.21 - 61.2 )	8.61 ( 6.71 )	6.64-10.57	8.59 ( 1.66 )	3.1 ( 1.43 )
DRUG MONITORING PROCEDURE NOT PERFORMED	1	INJURY, POISONING AND PROCEDURAL COMPLICATIONS	3.59 ( 0.51 - 25.52 )	3.59 ( 1.87 )	1.63-5.55	3.59 ( 0.7 )	1.84 ( 0.18 )
PRODUCT LABEL ISSUE	1	PRODUCT ISSUES	0.98 ( 0.14 - 6.94 )	0.98 ( 0 )	-0.98-2.94	0.98 ( 0.19 )	-0.03 ( -1.7 )
HERPES OESOPHAGITIS	1	INFECTIONS AND INFESTATIONS	25.61 ( 3.59 - 182.69 )	25.6 ( 23.53 )	23.64-27.57	25.48 ( 4.92 )	4.67 ( 2.99 )
BLOOD 25-HYDROXYCHOLECALCIFEROL DECREASED	1	INVESTIGATIONS	21.3 ( 2.99 - 151.87 )	21.3 ( 19.27 )	19.34-23.27	21.22 ( 4.1 )	4.41 ( 2.73 )
PANCREATIC CYSTADENOMA	1	NEOPLASMS BENIGN, MALIGNANT AND UNSPECIFIED (INCL CYSTS AND POLYPS)	101.93 ( 14.08 - 737.66 )	101.92 ( 98.01 )	99.94-103.9	99.98 ( 19.08 )	6.64 ( 4.93 )
VASCULAR COMPRESSION	1	VASCULAR DISORDERS	20.55 ( 2.88 - 146.45 )	20.54 ( 18.52 )	18.58-22.51	20.47 ( 3.96 )	4.36 ( 2.68 )
INTRA-ABDOMINAL HAEMATOMA	1	GASTROINTESTINAL DISORDERS	4.14 ( 0.58 - 29.38 )	4.14 ( 2.38 )	2.17-6.1	4.13 ( 0.8 )	2.05 ( 0.38 )
LOSS OF PERSONAL INDEPENDENCE IN DAILY ACTIVITIES	1	SOCIAL CIRCUMSTANCES	0.09 ( 0.01 - 0.64 )	0.09 ( 9.19 )	-1.87-2.05	0.09 ( 0.02 )	-3.47 ( -5.14 )
INFECTION SUSCEPTIBILITY INCREASED	1	INFECTIONS AND INFESTATIONS	2.89 ( 0.41 - 20.53 )	2.89 ( 1.23 )	0.93-4.85	2.89 ( 0.56 )	1.53 ( -0.14 )
DYSPLASIA	1	GENERAL DISORDERS AND ADMINISTRATION SITE CONDITIONS	5.11 ( 0.72 - 36.29 )	5.11 ( 3.3 )	3.15-7.07	5.1 ( 0.99 )	2.35 ( 0.68 )
SKIN HYPOPIGMENTATION	1	SKIN AND SUBCUTANEOUS TISSUE DISORDERS	3.47 ( 0.49 - 24.64 )	3.47 ( 1.75 )	1.51-5.43	3.47 ( 0.67 )	1.79 ( 0.13 )
SPINAL FUSION SURGERY	1	SURGICAL AND MEDICAL PROCEDURES	1.62 ( 0.23 - 11.53 )	1.62 ( 0.24 )	-0.34-3.58	1.62 ( 0.31 )	0.7 ( -0.97 )
PNEUMONECTOMY	1	SURGICAL AND MEDICAL PROCEDURES	32.29 ( 4.52 - 230.64 )	32.28 ( 30.13 )	30.32-34.25	32.09 ( 6.19 )	5 ( 3.32 )
UMBILICAL HERNIA	1	GASTROINTESTINAL DISORDERS	1.3 ( 0.18 - 9.22 )	1.3 ( 0.07 )	-0.66-3.26	1.3 ( 0.25 )	0.38 ( -1.29 )
BRAIN NEOPLASM MALIGNANT	1	NEOPLASMS BENIGN, MALIGNANT AND UNSPECIFIED (INCL CYSTS AND POLYPS)	1.27 ( 0.18 - 9.03 )	1.27 ( 0.06 )	-0.69-3.23	1.27 ( 0.25 )	0.35 ( -1.32 )
HUMAN METAPNEUMOVIRUS TEST POSITIVE	1	INVESTIGATIONS	57.76 ( 8.05 - 414.57 )	57.75 ( 55.16 )	55.78-59.72	57.13 ( 10.98 )	5.84 ( 4.14 )
BRONCHOALVEOLAR LAVAGE	1	INVESTIGATIONS	99.97 ( 13.82 - 723.21 )	99.96 ( 96.12 )	97.98-101.94	98.09 ( 18.73 )	6.62 ( 4.9 )
INTESTINAL ANASTOMOSIS	1	SURGICAL AND MEDICAL PROCEDURES	13.26 ( 1.86 - 94.39 )	13.26 ( 11.31 )	11.3-15.22	13.23 ( 2.56 )	3.73 ( 2.05 )
HCOV-OC43 INFECTION	1	INFECTIONS AND INFESTATIONS	273.59 ( 36.62 - 2043.99 )	273.57 ( 257.99 )	271.56-275.58	259.94 ( 48.32 )	8.02 ( 6.24 )
SKIN HAEMORRHAGE	1	SKIN AND SUBCUTANEOUS TISSUE DISORDERS	0.5 ( 0.07 - 3.56 )	0.5 ( 0.5 )	-1.46-2.46	0.5 ( 0.1 )	-1 ( -2.66 )
HYPERCAPNIA	1	RESPIRATORY, THORACIC AND MEDIASTINAL DISORDERS	2.09 ( 0.29 - 14.86 )	2.09 ( 0.57 )	0.13-4.05	2.09 ( 0.41 )	1.06 ( -0.6 )
TOTAL LUNG CAPACITY DECREASED	1	INVESTIGATIONS	3.97 ( 0.56 - 28.22 )	3.97 ( 2.22 )	2.01-5.93	3.97 ( 0.77 )	1.99 ( 0.32 )
ILEUS	1	GASTROINTESTINAL DISORDERS	0.51 ( 0.07 - 3.63 )	0.51 ( 0.47 )	-1.45-2.47	0.51 ( 0.1 )	-0.97 ( -2.63 )
INCONTINENCE	1	RENAL AND URINARY DISORDERS	0.57 ( 0.08 - 4.04 )	0.57 ( 0.33 )	-1.39-2.53	0.57 ( 0.11 )	-0.81 ( -2.48 )
OSTEOMYELITIS BACTERIAL	1	INFECTIONS AND INFESTATIONS	24.64 ( 3.45 - 175.73 )	24.63 ( 22.57 )	22.67-26.6	24.52 ( 4.74 )	4.62 ( 2.94 )
TUBERCULOSIS	1	INFECTIONS AND INFESTATIONS	0.48 ( 0.07 - 3.38 )	0.48 ( 0.58 )	-1.48-2.44	0.48 ( 0.09 )	-1.07 ( -2.74 )
PRODUCT USE COMPLAINT	1	INJURY, POISONING AND PROCEDURAL COMPLICATIONS	0.47 ( 0.07 - 3.31 )	0.47 ( 0.61 )	-1.49-2.43	0.47 ( 0.09 )	-1.1 ( -2.77 )
BIOPSY KIDNEY	1	INVESTIGATIONS	22.6 ( 3.17 - 161.15 )	22.6 ( 20.55 )	20.63-24.56	22.51 ( 4.35 )	4.49 ( 2.82 )
PLASMAPHERESIS	1	SURGICAL AND MEDICAL PROCEDURES	11.6 ( 1.63 - 82.56 )	11.6 ( 9.67 )	9.64-13.56	11.58 ( 2.24 )	3.53 ( 1.86 )
HUMAN HERPESVIRUS 6 ENCEPHALITIS	1	INFECTIONS AND INFESTATIONS	29.88 ( 4.18 - 213.31 )	29.87 ( 27.75 )	27.91-31.84	29.71 ( 5.74 )	4.89 ( 3.21 )
CONFABULATION	1	PSYCHIATRIC DISORDERS	21.22 ( 2.98 - 151.25 )	21.22 ( 19.18 )	19.25-23.18	21.13 ( 4.09 )	4.4 ( 2.73 )
BELL'S PALSY	1	NERVOUS SYSTEM DISORDERS	5.81 ( 0.82 - 41.28 )	5.81 ( 3.98 )	3.85-7.77	5.8 ( 1.12 )	2.54 ( 0.87 )
INFECTION IN AN IMMUNOCOMPROMISED HOST	1	INFECTIONS AND INFESTATIONS	9.5 ( 1.34 - 67.59 )	9.5 ( 7.59 )	7.54-11.46	9.49 ( 1.84 )	3.25 ( 1.58 )
GASTROENTERITIS	1	INFECTIONS AND INFESTATIONS	0.42 ( 0.06 - 2.97 )	0.42 ( 0.81 )	-1.54-2.38	0.42 ( 0.08 )	-1.26 ( -2.93 )
INCORRECT PRODUCT ADMINISTRATION DURATION	1	INJURY, POISONING AND PROCEDURAL COMPLICATIONS	0.12 ( 0.02 - 0.84 )	0.12 ( 6.56 )	-1.84-2.08	0.12 ( 0.02 )	-3.08 ( -4.74 )
CANCER PAIN	1	NEOPLASMS BENIGN, MALIGNANT AND UNSPECIFIED (INCL CYSTS AND POLYPS)	2.36 ( 0.33 - 16.79 )	2.36 ( 0.79 )	0.4-4.32	2.36 ( 0.46 )	1.24 ( -0.43 )
CORNEAL TRANSPLANT	1	SURGICAL AND MEDICAL PROCEDURES	8.63 ( 1.21 - 61.41 )	8.63 ( 6.74 )	6.67-10.6	8.62 ( 1.67 )	3.11 ( 1.44 )
PULMONARY MUCORMYCOSIS	1	INFECTIONS AND INFESTATIONS	18.57 ( 2.61 - 132.28 )	18.56 ( 16.56 )	16.6-20.53	18.5 ( 3.58 )	4.21 ( 2.53 )
HYPERLEUKOCYTOSIS	1	BLOOD AND LYMPHATIC SYSTEM DISORDERS	7.51 ( 1.06 - 53.41 )	7.51 ( 5.64 )	5.55-9.47	7.5 ( 1.45 )	2.91 ( 1.24 )
PNEUMONIA RESPIRATORY SYNCYTIAL VIRAL	1	INFECTIONS AND INFESTATIONS	8.58 ( 1.21 - 61 )	8.58 ( 6.68 )	6.62-10.54	8.56 ( 1.66 )	3.1 ( 1.43 )
FEBRILE BONE MARROW APLASIA	1	BLOOD AND LYMPHATIC SYSTEM DISORDERS	1.53 ( 0.21 - 10.84 )	1.53 ( 0.18 )	-0.43-3.49	1.53 ( 0.3 )	0.61 ( -1.06 )
PRODUCT AVAILABILITY ISSUE	1	PRODUCT ISSUES	0.37 ( 0.05 - 2.59 )	0.37 ( 1.1 )	-1.59-2.33	0.37 ( 0.07 )	-1.45 ( -3.12 )
ADENOCARCINOMA GASTRIC	1	NEOPLASMS BENIGN, MALIGNANT AND UNSPECIFIED (INCL CYSTS AND POLYPS)	6.92 ( 0.97 - 49.21 )	6.92 ( 5.06 )	4.96-8.88	6.91 ( 1.34 )	2.79 ( 1.12 )
PANCREATIC CARCINOMA	1	NEOPLASMS BENIGN, MALIGNANT AND UNSPECIFIED (INCL CYSTS AND POLYPS)	0.19 ( 0.03 - 1.38 )	0.19 ( 3.34 )	-1.77-2.15	0.19 ( 0.04 )	-2.36 ( -4.03 )
CONGENITAL SKIN DISORDER	1	CONGENITAL, FAMILIAL AND GENETIC DISORDERS	185.65 ( 25.26 - 1364.67 )	185.63 ( 177.31 )	183.64-187.63	179.27 ( 33.78 )	7.49 ( 5.74 )
XANTHOGRANULOMA	1	NEOPLASMS BENIGN, MALIGNANT AND UNSPECIFIED (INCL CYSTS AND POLYPS)	76.45 ( 10.61 - 550.61 )	76.44 ( 73.37 )	74.46-78.41	75.34 ( 14.44 )	6.24 ( 4.53 )
FOOT OPERATION	1	SURGICAL AND MEDICAL PROCEDURES	1.31 ( 0.18 - 9.31 )	1.31 ( 0.07 )	-0.65-3.27	1.31 ( 0.25 )	0.39 ( -1.28 )
LYMPHOCYTE STIMULATION TEST POSITIVE	1	INVESTIGATIONS	6.35 ( 0.89 - 45.17 )	6.35 ( 4.51 )	4.39-8.32	6.35 ( 1.23 )	2.67 ( 1 )
ORAL VIRAL INFECTION	1	INFECTIONS AND INFESTATIONS	50.47 ( 7.04 - 361.75 )	50.46 ( 48.02 )	48.49-52.43	49.99 ( 9.62 )	5.64 ( 3.95 )
DENTURE STOMATITIS	1	INFECTIONS AND INFESTATIONS	742.61 ( 91.36 - 6036.59 )	742.54 ( 647.97 )	740.44-744.63	649.85 ( 112.55 )	9.34 ( 7.42 )
BRONCHOPULMONARY DYSPLASIA	1	RESPIRATORY, THORACIC AND MEDIASTINAL DISORDERS	7.66 ( 1.08 - 54.43 )	7.66 ( 5.78 )	5.69-9.62	7.65 ( 1.48 )	2.93 ( 1.26 )
ENTEROCOLITIS	1	GASTROINTESTINAL DISORDERS	1.19 ( 0.17 - 8.44 )	1.19 ( 0.03 )	-0.77-3.15	1.19 ( 0.23 )	0.25 ( -1.42 )
HERPES SIMPLEX REACTIVATION	1	INFECTIONS AND INFESTATIONS	23.85 ( 3.34 - 170.06 )	23.84 ( 21.79 )	21.88-25.81	23.74 ( 4.59 )	4.57 ( 2.89 )
RENAL PAIN	1	RENAL AND URINARY DISORDERS	0.58 ( 0.08 - 4.11 )	0.58 ( 0.31 )	-1.38-2.54	0.58 ( 0.11 )	-0.79 ( -2.46 )
BRONCHIECTASIS	1	RESPIRATORY, THORACIC AND MEDIASTINAL DISORDERS	0.98 ( 0.14 - 6.98 )	0.98 ( 0 )	-0.98-2.94	0.98 ( 0.19 )	-0.03 ( -1.69 )
RETINITIS PIGMENTOSA	1	CONGENITAL, FAMILIAL AND GENETIC DISORDERS	22.9 ( 3.21 - 163.29 )	22.9 ( 20.85 )	20.93-24.86	22.8 ( 4.41 )	4.51 ( 2.83 )
GRANULOMA	1	GENERAL DISORDERS AND ADMINISTRATION SITE CONDITIONS	1.77 ( 0.25 - 12.57 )	1.77 ( 0.33 )	-0.19-3.73	1.77 ( 0.34 )	0.82 ( -0.84 )
PARESIS	1	NERVOUS SYSTEM DISORDERS	2.6 ( 0.37 - 18.5 )	2.6 ( 0.99 )	0.64-4.56	2.6 ( 0.5 )	1.38 ( -0.29 )
HYPHAEMA	1	INJURY, POISONING AND PROCEDURAL COMPLICATIONS	11.79 ( 1.66 - 83.88 )	11.79 ( 9.85 )	9.82-13.75	11.76 ( 2.28 )	3.56 ( 1.88 )
CENTRAL OBESITY	1	METABOLISM AND NUTRITION DISORDERS	8.74 ( 1.23 - 62.13 )	8.74 ( 6.84 )	6.77-10.7	8.72 ( 1.69 )	3.12 ( 1.45 )
URETHRAL STENOSIS	1	RENAL AND URINARY DISORDERS	8.59 ( 1.21 - 61.1 )	8.59 ( 6.7 )	6.63-10.55	8.58 ( 1.66 )	3.1 ( 1.43 )
PSYCHIATRIC DECOMPENSATION	1	PSYCHIATRIC DISORDERS	3.26 ( 0.46 - 23.14 )	3.26 ( 1.56 )	1.3-5.22	3.26 ( 0.63 )	1.7 ( 0.04 )
CARDIO-RESPIRATORY ARREST	1	CARDIAC DISORDERS	0.14 ( 0.02 - 1 )	0.14 ( 5.27 )	-1.82-2.1	0.14 ( 0.03 )	-2.83 ( -4.5 )
READING DISORDER	1	PSYCHIATRIC DISORDERS	2.61 ( 0.37 - 18.56 )	2.61 ( 1 )	0.65-4.57	2.61 ( 0.51 )	1.39 ( -0.28 )
RHEGMATOGENOUS RETINAL DETACHMENT	1	EYE DISORDERS	29.54 ( 4.14 - 210.87 )	29.53 ( 27.41 )	27.57-31.5	29.37 ( 5.67 )	4.88 ( 3.2 )
APPENDICITIS	1	INFECTIONS AND INFESTATIONS	0.68 ( 0.1 - 4.85 )	0.68 ( 0.15 )	-1.28-2.64	0.68 ( 0.13 )	-0.55 ( -2.22 )
PRODUCT SUPPLY ISSUE	1	PRODUCT ISSUES	1.03 ( 0.14 - 7.31 )	1.03 ( 0 )	-0.93-2.99	1.03 ( 0.2 )	0.04 ( -1.62 )
MELAENA	1	GASTROINTESTINAL DISORDERS	0.27 ( 0.04 - 1.9 )	0.27 ( 2 )	-1.69-2.23	0.27 ( 0.05 )	-1.9 ( -3.57 )
GLOMERULONEPHRITIS RAPIDLY PROGRESSIVE	1	RENAL AND URINARY DISORDERS	5.83 ( 0.82 - 41.47 )	5.83 ( 4 )	3.87-7.79	5.83 ( 1.13 )	2.54 ( 0.87 )
SECONDARY HYPERTENSION	1	VASCULAR DISORDERS	21.66 ( 3.04 - 154.41 )	21.66 ( 19.62 )	19.69-23.62	21.57 ( 4.17 )	4.43 ( 2.75 )
DUODENAL ULCER	1	GASTROINTESTINAL DISORDERS	0.86 ( 0.12 - 6.1 )	0.86 ( 0.02 )	-1.1-2.82	0.86 ( 0.17 )	-0.22 ( -1.89 )
FEELING HOT	1	GENERAL DISORDERS AND ADMINISTRATION SITE CONDITIONS	0.1 ( 0.01 - 0.69 )	0.1 ( 8.33 )	-1.86-2.06	0.1 ( 0.02 )	-3.35 ( -5.02 )
DRUG RESISTANCE MUTATION	1	CONGENITAL, FAMILIAL AND GENETIC DISORDERS	106.09 ( 14.65 - 768.36 )	106.08 ( 102 )	104.1-108.06	103.98 ( 19.83 )	6.7 ( 4.99 )
IMMUNE THROMBOCYTOPENIA	1	BLOOD AND LYMPHATIC SYSTEM DISORDERS	0.67 ( 0.1 - 4.79 )	0.67 ( 0.16 )	-1.29-2.63	0.67 ( 0.13 )	-0.57 ( -2.23 )
DYSGRAPHIA	1	NERVOUS SYSTEM DISORDERS	0.9 ( 0.13 - 6.36 )	0.9 ( 0.01 )	-1.06-2.86	0.9 ( 0.17 )	-0.16 ( -1.83 )
CYTOMEGALOVIRUS DUODENITIS	1	INFECTIONS AND INFESTATIONS	98.08 ( 13.56 - 709.31 )	98.07 ( 94.3 )	96.09-100.05	96.27 ( 18.39 )	6.59 ( 4.88 )
GLOMERULONEPHRITIS	1	RENAL AND URINARY DISORDERS	2.56 ( 0.36 - 18.18 )	2.56 ( 0.95 )	0.6-4.52	2.56 ( 0.5 )	1.36 ( -0.31 )
PERIODONTITIS	1	INFECTIONS AND INFESTATIONS	2.7 ( 0.38 - 19.17 )	2.7 ( 1.07 )	0.74-4.66	2.7 ( 0.52 )	1.43 ( -0.24 )
STREPTOCOCCAL BACTERAEMIA	1	INFECTIONS AND INFESTATIONS	6.09 ( 0.86 - 43.32 )	6.09 ( 4.25 )	4.13-8.05	6.09 ( 1.18 )	2.61 ( 0.94 )
BONE MARROW INFILTRATION	1	BLOOD AND LYMPHATIC SYSTEM DISORDERS	15.9 ( 2.23 - 113.21 )	15.9 ( 13.92 )	13.93-17.86	15.85 ( 3.07 )	3.99 ( 2.31 )
HYPOGEUSIA	1	NERVOUS SYSTEM DISORDERS	3.02 ( 0.43 - 21.47 )	3.02 ( 1.35 )	1.06-4.98	3.02 ( 0.59 )	1.59 ( -0.07 )
RENAL INFARCT	1	RENAL AND URINARY DISORDERS	4.22 ( 0.59 - 29.98 )	4.22 ( 2.45 )	2.26-6.18	4.22 ( 0.82 )	2.08 ( 0.41 )
POST PROCEDURAL CELLULITIS	1	INFECTIONS AND INFESTATIONS	31.31 ( 4.38 - 223.65 )	31.31 ( 29.17 )	29.35-33.28	31.13 ( 6.01 )	4.96 ( 3.28 )
NEUTROPHIL MORPHOLOGY ABNORMAL	1	INVESTIGATIONS	115.52 ( 15.92 - 838.13 )	115.51 ( 111.05 )	113.52-117.49	113.02 ( 21.53 )	6.82 ( 5.1 )
ELECTROCARDIOGRAM T WAVE PEAKED	1	INVESTIGATIONS	15.56 ( 2.19 - 110.83 )	15.56 ( 13.59 )	13.6-17.53	15.52 ( 3 )	3.96 ( 2.28 )
RHINITIS ALLERGIC	1	RESPIRATORY, THORACIC AND MEDIASTINAL DISORDERS	1.36 ( 0.19 - 9.62 )	1.35 ( 0.09 )	-0.61-3.32	1.35 ( 0.26 )	0.44 ( -1.23 )
UPPER RESPIRATORY TRACT INFLAMMATION	1	RESPIRATORY, THORACIC AND MEDIASTINAL DISORDERS	4.63 ( 0.65 - 32.92 )	4.63 ( 2.85 )	2.67-6.59	4.63 ( 0.9 )	2.21 ( 0.54 )
NEUROTOXICITY	1	NERVOUS SYSTEM DISORDERS	0.38 ( 0.05 - 2.72 )	0.38 ( 0.99 )	-1.58-2.34	0.38 ( 0.07 )	-1.38 ( -3.05 )
ACUTE PSYCHOSIS	1	PSYCHIATRIC DISORDERS	2.47 ( 0.35 - 17.54 )	2.47 ( 0.87 )	0.51-4.43	2.47 ( 0.48 )	1.3 ( -0.36 )
CORONARY ARTERY BYPASS	1	SURGICAL AND MEDICAL PROCEDURES	0.97 ( 0.14 - 6.86 )	0.97 ( 0 )	-0.99-2.93	0.97 ( 0.19 )	-0.05 ( -1.72 )
PROLYMPHOCYTIC LEUKAEMIA	1	NEOPLASMS BENIGN, MALIGNANT AND UNSPECIFIED (INCL CYSTS AND POLYPS)	157.52 ( 21.54 - 1151.88 )	157.51 ( 150.94 )	155.52-159.5	152.91 ( 28.94 )	7.26 ( 5.52 )
HIV-ASSOCIATED NEUROCOGNITIVE DISORDER	1	INFECTIONS AND INFESTATIONS	24.52 ( 3.44 - 174.9 )	24.52 ( 22.45 )	22.55-26.48	24.41 ( 4.72 )	4.61 ( 2.93 )
ELECTROCARDIOGRAM CHANGE	1	INVESTIGATIONS	6.03 ( 0.85 - 42.86 )	6.03 ( 4.19 )	4.07-7.99	6.02 ( 1.17 )	2.59 ( 0.92 )
RESPIRATORY ARREST	1	RESPIRATORY, THORACIC AND MEDIASTINAL DISORDERS	0.21 ( 0.03 - 1.46 )	0.21 ( 3.06 )	-1.75-2.17	0.21 ( 0.04 )	-2.28 ( -3.95 )
ILEUS PARALYTIC	1	GASTROINTESTINAL DISORDERS	1.39 ( 0.2 - 9.89 )	1.39 ( 0.11 )	-0.57-3.35	1.39 ( 0.27 )	0.48 ( -1.19 )
INTESTINAL MASS	1	GASTROINTESTINAL DISORDERS	4.53 ( 0.64 - 32.2 )	4.53 ( 2.75 )	2.57-6.49	4.53 ( 0.88 )	2.18 ( 0.51 )
OBLITERATIVE BRONCHIOLITIS	1	RESPIRATORY, THORACIC AND MEDIASTINAL DISORDERS	4.55 ( 0.64 - 32.32 )	4.55 ( 2.77 )	2.59-6.51	4.54 ( 0.88 )	2.18 ( 0.52 )
URETEROPYELOSTOMY	1	SURGICAL AND MEDICAL PROCEDURES	Inf ( NaN - Inf )	Inf ( 5197.78 )	-	5198.78 ( 0 )	12.34 ( 9.71 )
HUMAN POLYOMAVIRUS INFECTION	1	INFECTIONS AND INFESTATIONS	13.26 ( 1.86 - 94.39 )	13.26 ( 11.31 )	11.3-15.22	13.23 ( 2.56 )	3.73 ( 2.05 )
METASTASES TO CENTRAL NERVOUS SYSTEM	1	NEOPLASMS BENIGN, MALIGNANT AND UNSPECIFIED (INCL CYSTS AND POLYPS)	0.51 ( 0.07 - 3.62 )	0.51 ( 0.47 )	-1.45-2.47	0.51 ( 0.1 )	-0.97 ( -2.64 )
POSTOPERATIVE WOUND INFECTION	1	INFECTIONS AND INFESTATIONS	0.79 ( 0.11 - 5.58 )	0.79 ( 0.06 )	-1.17-2.75	0.79 ( 0.15 )	-0.35 ( -2.01 )
HISTOPLASMOSIS	1	INFECTIONS AND INFESTATIONS	3.45 ( 0.49 - 24.49 )	3.45 ( 1.74 )	1.49-5.41	3.45 ( 0.67 )	1.78 ( 0.12 )
ANAL ATRESIA	1	CONGENITAL, FAMILIAL AND GENETIC DISORDERS	10.29 ( 1.45 - 73.23 )	10.29 ( 8.37 )	8.33-12.25	10.27 ( 1.99 )	3.36 ( 1.69 )
CONGENITAL CENTRAL NERVOUS SYSTEM ANOMALY	1	CONGENITAL, FAMILIAL AND GENETIC DISORDERS	5.49 ( 0.77 - 39.05 )	5.49 ( 3.67 )	3.53-7.46	5.49 ( 1.06 )	2.46 ( 0.79 )
CONGENITAL GENITOURINARY ABNORMALITY	1	CONGENITAL, FAMILIAL AND GENETIC DISORDERS	33.76 ( 4.72 - 241.19 )	33.75 ( 31.58 )	31.79-35.72	33.54 ( 6.47 )	5.07 ( 3.39 )
DEFORMITY	1	GENERAL DISORDERS AND ADMINISTRATION SITE CONDITIONS	0.61 ( 0.09 - 4.3 )	0.61 ( 0.26 )	-1.35-2.57	0.61 ( 0.12 )	-0.72 ( -2.39 )
FOOT DEFORMITY	1	MUSCULOSKELETAL AND CONNECTIVE TISSUE DISORDERS	0.5 ( 0.07 - 3.54 )	0.5 ( 0.51 )	-1.46-2.46	0.5 ( 0.1 )	-1.01 ( -2.67 )
NEURAL TUBE DEFECT	1	CONGENITAL, FAMILIAL AND GENETIC DISORDERS	7.52 ( 1.06 - 53.49 )	7.52 ( 5.65 )	5.56-9.48	7.51 ( 1.46 )	2.91 ( 1.24 )
SINGLE FUNCTIONAL KIDNEY	1	RENAL AND URINARY DISORDERS	8.66 ( 1.22 - 61.61 )	8.66 ( 6.77 )	6.7-10.62	8.65 ( 1.68 )	3.11 ( 1.44 )
EPIDIDYMITIS	1	INFECTIONS AND INFESTATIONS	5.18 ( 0.73 - 36.8 )	5.18 ( 3.37 )	3.22-7.14	5.17 ( 1 )	2.37 ( 0.7 )
ORCHITIS	1	INFECTIONS AND INFESTATIONS	6.12 ( 0.86 - 43.52 )	6.12 ( 4.28 )	4.16-8.08	6.12 ( 1.19 )	2.61 ( 0.94 )
PROGRESSIVE MULTIFOCAL LEUKOENCEPHALOPATHY	1	INFECTIONS AND INFESTATIONS	0.74 ( 0.1 - 5.22 )	0.74 ( 0.09 )	-1.22-2.7	0.74 ( 0.14 )	-0.44 ( -2.11 )
ANGIOPATHY	1	VASCULAR DISORDERS	1.04 ( 0.15 - 7.42 )	1.04 ( 0 )	-0.92-3.01	1.04 ( 0.2 )	0.06 ( -1.6 )
RENAL VESSEL DISORDER	1	RENAL AND URINARY DISORDERS	26.12 ( 3.66 - 186.38 )	26.12 ( 24.04 )	24.15-28.08	25.99 ( 5.02 )	4.7 ( 3.02 )
WOUND INFECTION	1	INFECTIONS AND INFESTATIONS	0.66 ( 0.09 - 4.72 )	0.66 ( 0.17 )	-1.3-2.62	0.66 ( 0.13 )	-0.59 ( -2.26 )
CUTANEOUS T-CELL LYMPHOMA	1	NEOPLASMS BENIGN, MALIGNANT AND UNSPECIFIED (INCL CYSTS AND POLYPS)	3.43 ( 0.48 - 24.36 )	3.43 ( 1.72 )	1.47-5.39	3.43 ( 0.66 )	1.78 ( 0.11 )
CARDIOVASCULAR DISORDER	1	CARDIAC DISORDERS	0.22 ( 0.03 - 1.59 )	0.22 ( 2.7 )	-1.74-2.18	0.22 ( 0.04 )	-2.16 ( -3.83 )
NON-HODGKIN'S LYMPHOMA	1	NEOPLASMS BENIGN, MALIGNANT AND UNSPECIFIED (INCL CYSTS AND POLYPS)	0.98 ( 0.14 - 6.98 )	0.98 ( 0 )	-0.98-2.94	0.98 ( 0.19 )	-0.03 ( -1.69 )
ERYTHEMA NODOSUM	1	SKIN AND SUBCUTANEOUS TISSUE DISORDERS	1.75 ( 0.25 - 12.43 )	1.75 ( 0.32 )	-0.21-3.71	1.75 ( 0.34 )	0.81 ( -0.86 )
BODY TEMPERATURE INCREASED	1	INVESTIGATIONS	0.29 ( 0.04 - 2.02 )	0.29 ( 1.79 )	-1.67-2.25	0.29 ( 0.06 )	-1.81 ( -3.48 )
TONSILLAR ULCER	1	RESPIRATORY, THORACIC AND MEDIASTINAL DISORDERS	39.99 ( 5.59 - 286.05 )	39.98 ( 37.72 )	38.02-41.95	39.69 ( 7.65 )	5.31 ( 3.63 )
INGROWN HAIR	1	SKIN AND SUBCUTANEOUS TISSUE DISORDERS	8.63 ( 1.21 - 61.41 )	8.63 ( 6.74 )	6.67-10.6	8.62 ( 1.67 )	3.11 ( 1.44 )
EXSANGUINATION	1	VASCULAR DISORDERS	27.5 ( 3.85 - 196.29 )	27.5 ( 25.4 )	25.54-29.47	27.36 ( 5.28 )	4.77 ( 3.09 )
CHOLANGITIS	1	HEPATOBILIARY DISORDERS	1.08 ( 0.15 - 7.66 )	1.08 ( 0.01 )	-0.88-3.04	1.08 ( 0.21 )	0.11 ( -1.56 )
CHOLECYSTITIS INFECTIVE	1	INFECTIONS AND INFESTATIONS	2.25 ( 0.32 - 16 )	2.25 ( 0.7 )	0.29-4.21	2.25 ( 0.44 )	1.17 ( -0.5 )
HEPATIC HAEMATOMA	1	HEPATOBILIARY DISORDERS	12.2 ( 1.71 - 86.84 )	12.2 ( 10.26 )	10.24-14.16	12.18 ( 2.36 )	3.61 ( 1.93 )
ENCAPSULATING PERITONEAL SCLEROSIS	1	GASTROINTESTINAL DISORDERS	12.62 ( 1.77 - 89.8 )	12.62 ( 10.67 )	10.65-14.58	12.59 ( 2.44 )	3.65 ( 1.98 )
BLOOD DISORDER	1	BLOOD AND LYMPHATIC SYSTEM DISORDERS	0.75 ( 0.11 - 5.33 )	0.75 ( 0.08 )	-1.21-2.71	0.75 ( 0.15 )	-0.41 ( -2.08 )
NEUTROPENIC SEPSIS	1	INFECTIONS AND INFESTATIONS	0.82 ( 0.12 - 5.81 )	0.82 ( 0.04 )	-1.14-2.78	0.82 ( 0.16 )	-0.29 ( -1.96 )
ONCOLOGIC COMPLICATION	1	NEOPLASMS BENIGN, MALIGNANT AND UNSPECIFIED (INCL CYSTS AND POLYPS)	6.43 ( 0.9 - 45.68 )	6.42 ( 4.57 )	4.46-8.39	6.42 ( 1.24 )	2.68 ( 1.01 )
ANGIOSARCOMA	1	NEOPLASMS BENIGN, MALIGNANT AND UNSPECIFIED (INCL CYSTS AND POLYPS)	12.68 ( 1.78 - 90.23 )	12.68 ( 10.73 )	10.72-14.64	12.65 ( 2.45 )	3.66 ( 1.99 )
STILL'S DISEASE	1	MUSCULOSKELETAL AND CONNECTIVE TISSUE DISORDERS	7.08 ( 1 - 50.35 )	7.08 ( 5.22 )	5.12-9.04	7.07 ( 1.37 )	2.82 ( 1.15 )
CARDIOMEGALY	1	CARDIAC DISORDERS	0.45 ( 0.06 - 3.2 )	0.45 ( 0.67 )	-1.51-2.41	0.45 ( 0.09 )	-1.15 ( -2.82 )
BONE MARROW TRANSPLANT	1	SURGICAL AND MEDICAL PROCEDURES	3.35 ( 0.47 - 23.76 )	3.34 ( 1.64 )	1.38-5.31	3.34 ( 0.65 )	1.74 ( 0.07 )
ILEAL PERFORATION	1	GASTROINTESTINAL DISORDERS	9.1 ( 1.28 - 64.75 )	9.1 ( 7.2 )	7.14-11.06	9.09 ( 1.76 )	3.18 ( 1.51 )
TUBERCULOSIS GASTROINTESTINAL	1	INFECTIONS AND INFESTATIONS	18.97 ( 2.66 - 135.18 )	18.97 ( 16.96 )	17.01-20.93	18.9 ( 3.66 )	4.24 ( 2.57 )
CEREBRAL ISCHAEMIA	1	NERVOUS SYSTEM DISORDERS	1.09 ( 0.15 - 7.74 )	1.09 ( 0.01 )	-0.87-3.05	1.09 ( 0.21 )	0.13 ( -1.54 )
FUNGAL ENDOCARDITIS	1	INFECTIONS AND INFESTATIONS	23.42 ( 3.28 - 166.99 )	23.41 ( 21.36 )	21.45-25.38	23.31 ( 4.51 )	4.54 ( 2.87 )
PSEUDALLESCHERIA INFECTION	1	INFECTIONS AND INFESTATIONS	199.93 ( 27.13 - 1473.54 )	199.91 ( 190.59 )	197.92-201.91	192.55 ( 36.2 )	7.59 ( 5.84 )
LUNG TRANSPLANT	1	SURGICAL AND MEDICAL PROCEDURES	1.66 ( 0.23 - 11.76 )	1.66 ( 0.26 )	-0.3-3.62	1.66 ( 0.32 )	0.73 ( -0.94 )
CHRONIC HEPATIC FAILURE	1	HEPATOBILIARY DISORDERS	9.37 ( 1.32 - 66.62 )	9.37 ( 7.46 )	7.4-11.33	9.35 ( 1.81 )	3.23 ( 1.55 )
INCISIONAL HERNIA	1	INJURY, POISONING AND PROCEDURAL COMPLICATIONS	3.92 ( 0.55 - 27.85 )	3.92 ( 2.17 )	1.96-5.88	3.92 ( 0.76 )	1.97 ( 0.3 )
INTESTINAL OBSTRUCTION	1	GASTROINTESTINAL DISORDERS	0.17 ( 0.02 - 1.22 )	0.17 ( 3.97 )	-1.79-2.13	0.17 ( 0.03 )	-2.54 ( -4.2 )
POSTRENAL FAILURE	1	RENAL AND URINARY DISORDERS	13.06 ( 1.84 - 92.96 )	13.06 ( 11.11 )	11.1-15.02	13.03 ( 2.52 )	3.7 ( 2.03 )
HYPERTRIGLYCERIDAEMIA	1	METABOLISM AND NUTRITION DISORDERS	1.08 ( 0.15 - 7.64 )	1.08 ( 0.01 )	-0.88-3.04	1.08 ( 0.21 )	0.1 ( -1.56 )
ANGIOIMMUNOBLASTIC T-CELL LYMPHOMA	1	NEOPLASMS BENIGN, MALIGNANT AND UNSPECIFIED (INCL CYSTS AND POLYPS)	21.84 ( 3.06 - 155.71 )	21.84 ( 19.8 )	19.88-23.8	21.75 ( 4.2 )	4.44 ( 2.77 )
THROMBOPHLEBITIS	1	VASCULAR DISORDERS	1.64 ( 0.23 - 11.65 )	1.64 ( 0.25 )	-0.32-3.6	1.64 ( 0.32 )	0.71 ( -0.95 )
GLOMERULAR FILTRATION RATE ABNORMAL	1	INVESTIGATIONS	4.78 ( 0.67 - 33.95 )	4.78 ( 2.98 )	2.82-6.74	4.77 ( 0.93 )	2.26 ( 0.59 )
MULTI-ORGAN DISORDER	1	GENERAL DISORDERS AND ADMINISTRATION SITE CONDITIONS	2.97 ( 0.42 - 21.09 )	2.97 ( 1.3 )	1.01-4.93	2.97 ( 0.58 )	1.57 ( -0.1 )
BLOOD TRIGLYCERIDES INCREASED	1	INVESTIGATIONS	0.33 ( 0.05 - 2.38 )	0.33 ( 1.32 )	-1.62-2.29	0.34 ( 0.06 )	-1.58 ( -3.24 )
CEREBRAL HAEMATOMA	1	NERVOUS SYSTEM DISORDERS	1.79 ( 0.25 - 12.72 )	1.79 ( 0.35 )	-0.17-3.75	1.79 ( 0.35 )	0.84 ( -0.83 )
ENDOCARDITIS BACTERIAL	1	INFECTIONS AND INFESTATIONS	7.66 ( 1.08 - 54.43 )	7.66 ( 5.78 )	5.69-9.62	7.65 ( 1.48 )	2.93 ( 1.26 )
PNEUMOCOCCAL SEPSIS	1	INFECTIONS AND INFESTATIONS	9.28 ( 1.31 - 66.02 )	9.28 ( 7.38 )	7.32-11.24	9.27 ( 1.79 )	3.21 ( 1.54 )
CEREBRAL ARTERY EMBOLISM	1	NERVOUS SYSTEM DISORDERS	4.7 ( 0.66 - 33.4 )	4.7 ( 2.91 )	2.74-6.66	4.7 ( 0.91 )	2.23 ( 0.56 )
ATRIAL SEPTAL DEFECT	1	CONGENITAL, FAMILIAL AND GENETIC DISORDERS	0.67 ( 0.09 - 4.73 )	0.67 ( 0.17 )	-1.29-2.63	0.67 ( 0.13 )	-0.59 ( -2.25 )
POLYDACTYLY	1	CONGENITAL, FAMILIAL AND GENETIC DISORDERS	4.97 ( 0.7 - 35.32 )	4.97 ( 3.17 )	3.01-6.93	4.97 ( 0.96 )	2.31 ( 0.64 )
VENTRICULAR SEPTAL DEFECT	1	CONGENITAL, FAMILIAL AND GENETIC DISORDERS	0.98 ( 0.14 - 6.93 )	0.98 ( 0 )	-0.98-2.94	0.98 ( 0.19 )	-0.04 ( -1.7 )
KIDNEY MALFORMATION	1	CONGENITAL, FAMILIAL AND GENETIC DISORDERS	16.66 ( 2.34 - 118.67 )	16.66 ( 14.67 )	14.7-18.62	16.61 ( 3.21 )	4.05 ( 2.38 )
MICROTIA	1	CONGENITAL, FAMILIAL AND GENETIC DISORDERS	17.8 ( 2.5 - 126.82 )	17.8 ( 15.8 )	15.84-19.76	17.74 ( 3.43 )	4.15 ( 2.47 )
OPSOCLONUS MYOCLONUS	1	EYE DISORDERS	26.66 ( 3.74 - 190.22 )	26.66 ( 24.57 )	24.69-28.62	26.52 ( 5.12 )	4.73 ( 3.05 )
LYME DISEASE	1	INFECTIONS AND INFESTATIONS	1.84 ( 0.26 - 13.08 )	1.84 ( 0.38 )	-0.12-3.8	1.84 ( 0.36 )	0.88 ( -0.79 )
INTRAVENTRICULAR HAEMORRHAGE	1	NERVOUS SYSTEM DISORDERS	2.3 ( 0.32 - 16.33 )	2.3 ( 0.73 )	0.34-4.26	2.3 ( 0.45 )	1.2 ( -0.47 )
PAROTID LIPOMATOSIS	1	GASTROINTESTINAL DISORDERS	866.38 ( 104.29 - 7197.28 )	866.3 ( 740.83 )	864.18-868.41	742.68 ( 126.32 )	9.54 ( 7.58 )
SUDDEN CARDIAC DEATH	1	GENERAL DISORDERS AND ADMINISTRATION SITE CONDITIONS	1.78 ( 0.25 - 12.66 )	1.78 ( 0.34 )	-0.18-3.74	1.78 ( 0.35 )	0.83 ( -0.83 )
CEREBELLAR SYNDROME	1	NERVOUS SYSTEM DISORDERS	2.63 ( 0.37 - 18.65 )	2.63 ( 1.01 )	0.66-4.59	2.62 ( 0.51 )	1.39 ( -0.28 )
GRANULOCYTE COUNT DECREASED	1	INVESTIGATIONS	4.97 ( 0.7 - 35.32 )	4.97 ( 3.17 )	3.01-6.93	4.97 ( 0.96 )	2.31 ( 0.64 )
RETINAL HAEMORRHAGE	1	EYE DISORDERS	0.86 ( 0.12 - 6.1 )	0.86 ( 0.02 )	-1.1-2.82	0.86 ( 0.17 )	-0.22 ( -1.89 )
OPTIC NEURITIS	1	NERVOUS SYSTEM DISORDERS	0.64 ( 0.09 - 4.57 )	0.64 ( 0.2 )	-1.32-2.6	0.64 ( 0.12 )	-0.64 ( -2.3 )
END STAGE AIDS	1	INFECTIONS AND INFESTATIONS	192.53 ( 26.16 - 1417.02 )	192.51 ( 183.71 )	190.51-194.51	185.67 ( 34.95 )	7.54 ( 5.79 )
HISTOPLASMOSIS DISSEMINATED	1	INFECTIONS AND INFESTATIONS	4.8 ( 0.68 - 34.14 )	4.8 ( 3.01 )	2.84-6.76	4.8 ( 0.93 )	2.26 ( 0.59 )
ROTAVIRUS INFECTION	1	INFECTIONS AND INFESTATIONS	12.32 ( 1.73 - 87.66 )	12.32 ( 10.37 )	10.35-14.28	12.29 ( 2.38 )	3.62 ( 1.95 )
ACNE	1	SKIN AND SUBCUTANEOUS TISSUE DISORDERS	0.08 ( 0.01 - 0.54 )	0.08 ( 11.14 )	-1.88-2.04	0.08 ( 0.01 )	-3.71 ( -5.37 )
POLYHYDRAMNIOS	1	PREGNANCY, PUERPERIUM AND PERINATAL CONDITIONS	5.97 ( 0.84 - 42.47 )	5.97 ( 4.14 )	4.01-7.94	5.97 ( 1.16 )	2.58 ( 0.91 )
PREMATURE LABOUR	1	PREGNANCY, PUERPERIUM AND PERINATAL CONDITIONS	0.97 ( 0.14 - 6.89 )	0.97 ( 0 )	-0.99-2.93	0.97 ( 0.19 )	-0.04 ( -1.71 )
CEREBRAL HAEMORRHAGE NEONATAL	1	NERVOUS SYSTEM DISORDERS	25.48 ( 3.57 - 181.79 )	25.48 ( 23.4 )	23.51-27.44	25.36 ( 4.9 )	4.66 ( 2.99 )
CONGENITAL ANOMALY	1	CONGENITAL, FAMILIAL AND GENETIC DISORDERS	0.77 ( 0.11 - 5.47 )	0.77 ( 0.07 )	-1.19-2.73	0.77 ( 0.15 )	-0.38 ( -2.04 )
CONGENITAL OESOPHAGEAL ANOMALY	1	CONGENITAL, FAMILIAL AND GENETIC DISORDERS	113.01 ( 15.58 - 819.53 )	113 ( 108.64 )	111.01-114.98	110.61 ( 21.08 )	6.79 ( 5.07 )
DEATH NEONATAL	1	GENERAL DISORDERS AND ADMINISTRATION SITE CONDITIONS	4.24 ( 0.6 - 30.13 )	4.24 ( 2.47 )	2.28-6.2	4.24 ( 0.82 )	2.08 ( 0.41 )
TRACHEO-OESOPHAGEAL FISTULA	1	CONGENITAL, FAMILIAL AND GENETIC DISORDERS	9.49 ( 1.33 - 67.47 )	9.48 ( 7.58 )	7.52-11.45	9.47 ( 1.83 )	3.24 ( 1.57 )
GASTROINTESTINAL TOXICITY	1	GASTROINTESTINAL DISORDERS	1.5 ( 0.21 - 10.68 )	1.5 ( 0.17 )	-0.46-3.46	1.5 ( 0.29 )	0.59 ( -1.08 )
VULVOVAGINAL MYCOTIC INFECTION	1	INFECTIONS AND INFESTATIONS	1.37 ( 0.19 - 9.75 )	1.37 ( 0.1 )	-0.59-3.33	1.37 ( 0.27 )	0.46 ( -1.21 )
CYSTITIS VIRAL	1	INFECTIONS AND INFESTATIONS	20.88 ( 2.93 - 148.81 )	20.87 ( 18.85 )	18.91-22.84	20.8 ( 4.02 )	4.38 ( 2.7 )
COAGULOPATHY	1	BLOOD AND LYMPHATIC SYSTEM DISORDERS	0.36 ( 0.05 - 2.52 )	0.36 ( 1.17 )	-1.6-2.32	0.36 ( 0.07 )	-1.49 ( -3.16 )
DIABETIC NEUROPATHY	1	NERVOUS SYSTEM DISORDERS	1.15 ( 0.16 - 8.19 )	1.15 ( 0.02 )	-0.81-3.11	1.15 ( 0.22 )	0.21 ( -1.46 )
EOSINOPHILIC PUSTULAR FOLLICULITIS	1	SKIN AND SUBCUTANEOUS TISSUE DISORDERS	68.4 ( 9.51 - 491.91 )	68.39 ( 65.54 )	66.42-70.36	67.52 ( 12.96 )	6.08 ( 4.38 )
FOLATE DEFICIENCY	1	METABOLISM AND NUTRITION DISORDERS	5.69 ( 0.8 - 40.42 )	5.69 ( 3.86 )	3.73-7.65	5.68 ( 1.1 )	2.51 ( 0.84 )
LYMPHADENITIS	1	BLOOD AND LYMPHATIC SYSTEM DISORDERS	2.6 ( 0.37 - 18.47 )	2.6 ( 0.98 )	0.64-4.56	2.6 ( 0.5 )	1.38 ( -0.29 )
PERIARTHRITIS	1	MUSCULOSKELETAL AND CONNECTIVE TISSUE DISORDERS	2.68 ( 0.38 - 19.07 )	2.68 ( 1.06 )	0.72-4.65	2.68 ( 0.52 )	1.42 ( -0.24 )
GASTRIC LAVAGE	1	SURGICAL AND MEDICAL PROCEDURES	33.76 ( 4.72 - 241.19 )	33.75 ( 31.58 )	31.79-35.72	33.54 ( 6.47 )	5.07 ( 3.39 )
CONCUSSION	1	INJURY, POISONING AND PROCEDURAL COMPLICATIONS	0.8 ( 0.11 - 5.7 )	0.8 ( 0.05 )	-1.16-2.76	0.8 ( 0.16 )	-0.32 ( -1.98 )
GLIOBLASTOMA MULTIFORME	1	NEOPLASMS BENIGN, MALIGNANT AND UNSPECIFIED (INCL CYSTS AND POLYPS)	6.9 ( 0.97 - 49.08 )	6.9 ( 5.04 )	4.94-8.86	6.89 ( 1.34 )	2.79 ( 1.12 )
TRANSPLANT	1	SURGICAL AND MEDICAL PROCEDURES	2.73 ( 0.38 - 19.4 )	2.73 ( 1.1 )	0.77-4.69	2.73 ( 0.53 )	1.45 ( -0.22 )
CATHETER REMOVAL	1	SURGICAL AND MEDICAL PROCEDURES	16.09 ( 2.26 - 114.61 )	16.09 ( 14.11 )	14.13-18.06	16.05 ( 3.1 )	4 ( 2.33 )
DIAPHRAGMATIC PARALYSIS	1	RESPIRATORY, THORACIC AND MEDIASTINAL DISORDERS	10.27 ( 1.44 - 73.08 )	10.27 ( 8.35 )	8.31-12.23	10.25 ( 1.99 )	3.36 ( 1.69 )
TRACHEAL OPERATION	1	SURGICAL AND MEDICAL PROCEDURES	115.52 ( 15.92 - 838.13 )	115.51 ( 111.05 )	113.52-117.49	113.02 ( 21.53 )	6.82 ( 5.1 )
PNEUMONIA INFLUENZAL	1	INFECTIONS AND INFESTATIONS	6.2 ( 0.87 - 44.04 )	6.2 ( 4.35 )	4.23-8.16	6.19 ( 1.2 )	2.63 ( 0.96 )
